# Supplementary material for: High Structural Diversity of Aeruginosins in Bloom-Forming Cyanobacteria of the Genus Planktothrix as a Consequence of Multiple Recombination Events
Source: MDPI journal article supplement (doi:10.3390/md21120638), 2023-12-13
Supplement: s1 [file s1]

## Supplementary Information

### **High structural diversity of aeruginosins in bloom-forming cyanobacteria of the genus *Planktothrix* as a consequence of multiple recombination events**

Elisabeth Entfellner<sup>1,2</sup>, Kathrin B.L. Baumann<sup>1#</sup>, Christine Edwards<sup>3</sup>, Rainer Kurmayer<sup>1,2\*</sup>

<sup>1</sup> Research Department for Limnology, Universität Innsbruck, Mondseestrasse 9, 5310 Mondsee, Austria, elisabeth.entfellner@gmx.at; katbaumann87@gmail.com

<sup>2</sup> Universität Innsbruck, Innrain 52, 6020 Innsbruck, Austria;

<sup>3</sup> CyanoSol Research Group, Pharmacy & Life Sciences, Robert Gordon University, Aberdeen, AB10 7GJ UK c.edwards@rgu.ac.uk

\*Corresponding Author: rainer.kurmayer@uibk.ac.at

# Current address: Department of Surface Waters-Research and Management, Swiss Federal Institute for Aquatic Science and Technology (EAWAG), 6047 Kastanienbaum, Switzerland.

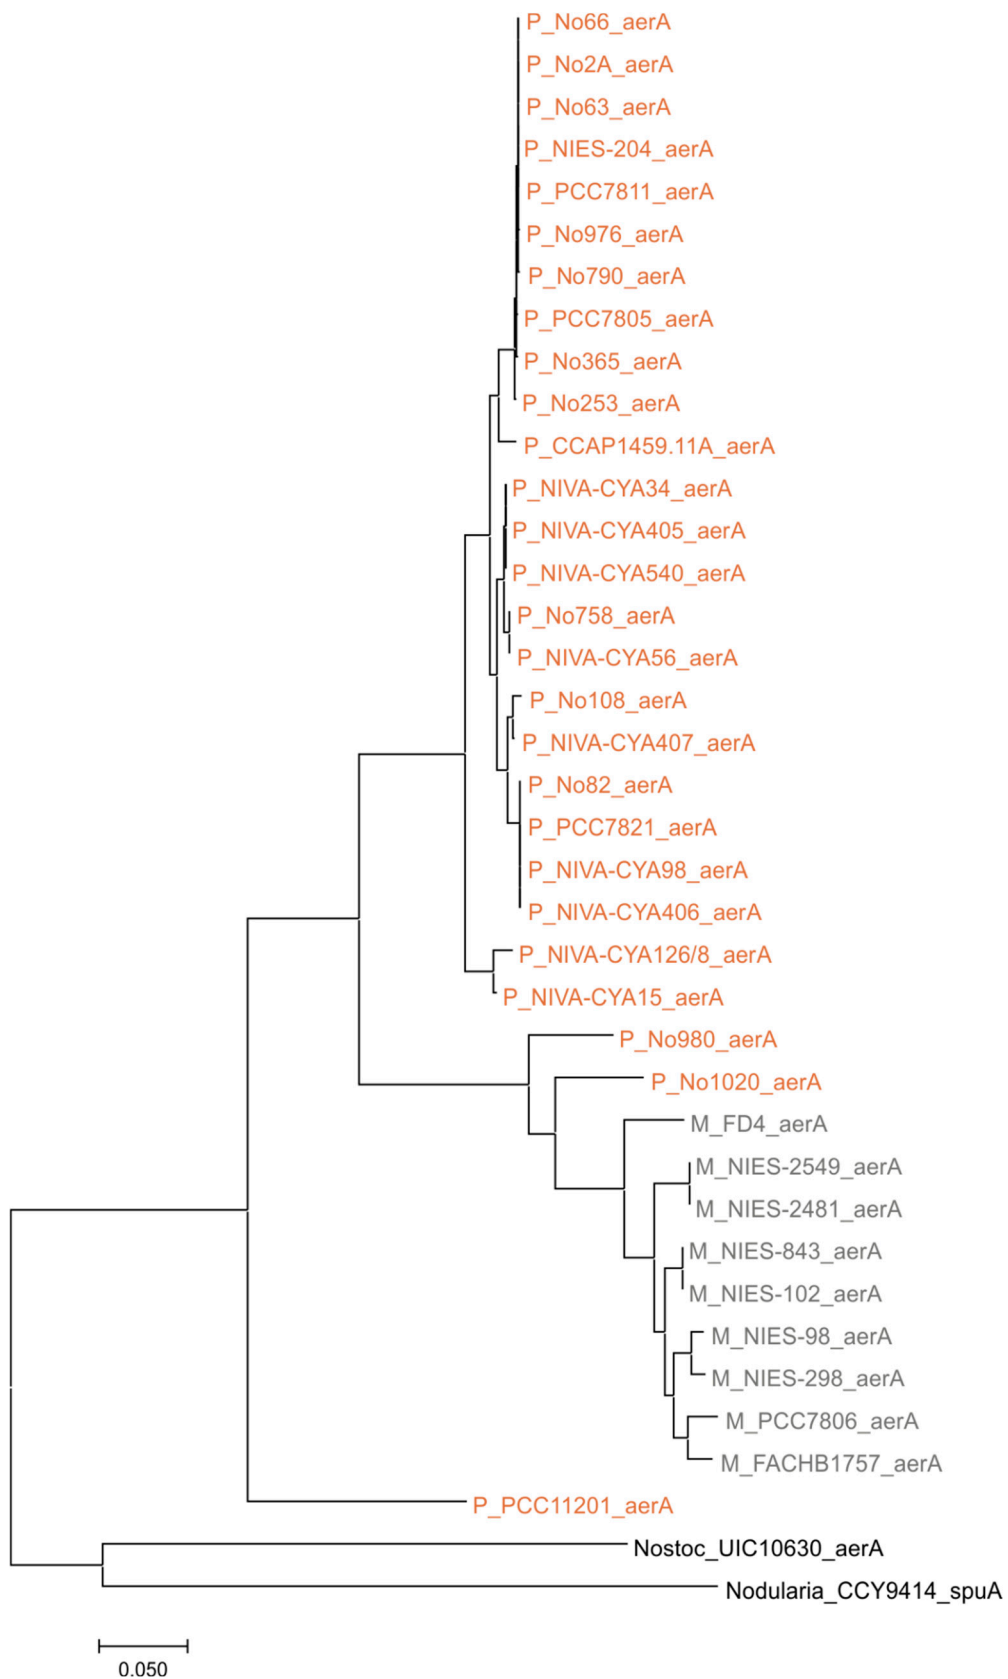

**Figure S1.** Maximum likelihood phylogenetic tree based on *aerA* (nucleotide) sequence (alignment: 4407 bp). P\_, M\_ indicate genera *Planktothrix* or *Microcystis*, each. *Nostoc* UIC10630 and *Nodularia* CCY9414 served as outgroups.

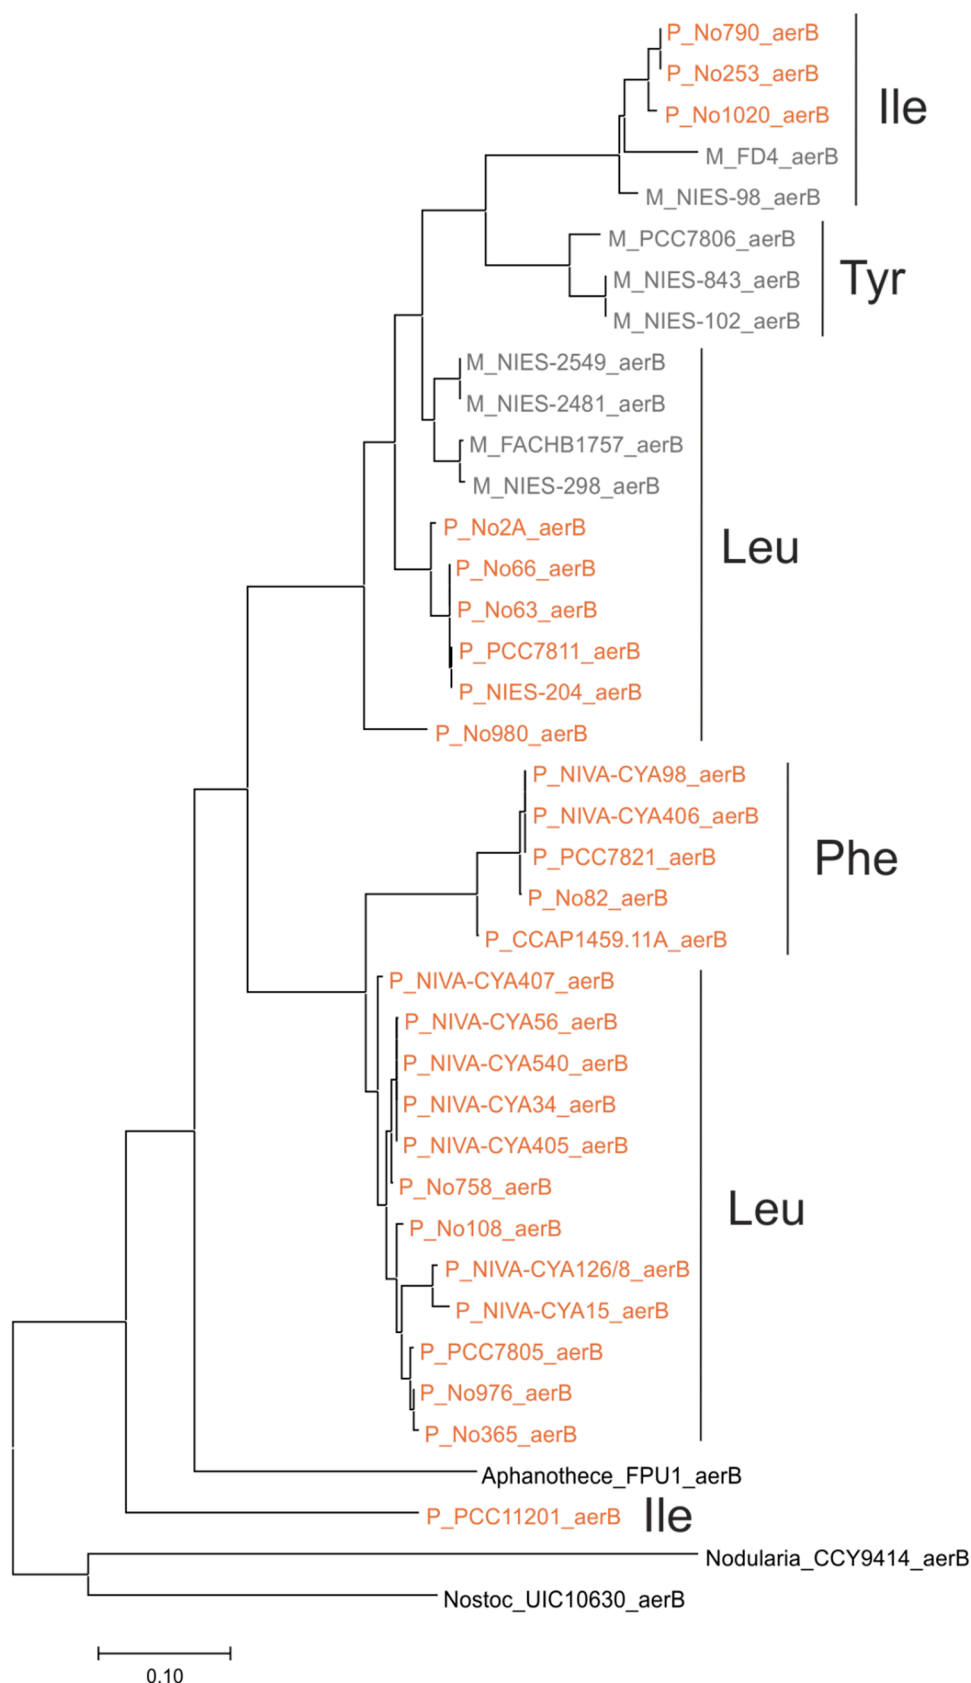

**Figure S2.** Maximum likelihood phylogenetic tree based on *aerB* (nucleotide) sequence (alignment: 4857 bp). P\_, M\_ indicate genera *Planktothrix* or *Microcystis*, each. *Nostoc* UIC10630 and *Nodularia* CCY9414 served as outgroups. Using the NRPS prediction tool [26] four different specificity-conferring codes for the adenylation domain of AerB were identified: Leu, Ile, Phe and Tyr.

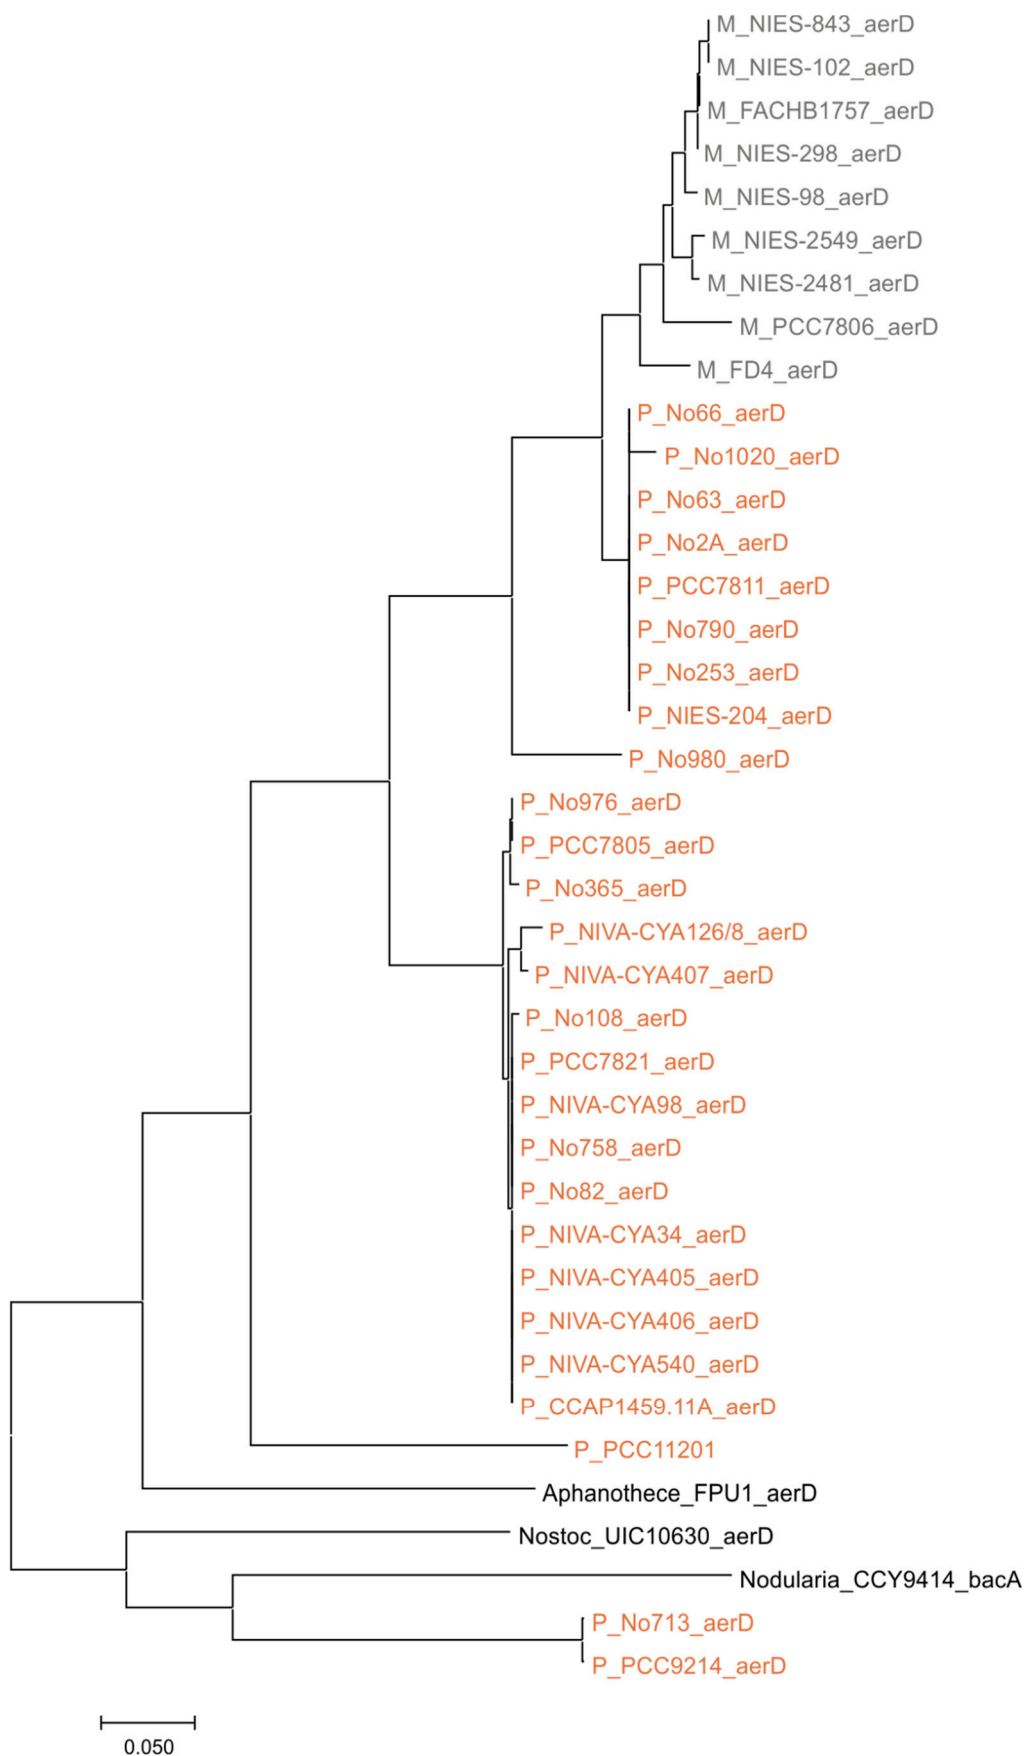

**Figure S3.** Maximum likelihood phylogenetic tree based on *aerD* (nucleotide) sequence (alignment: 633 bp). P\_, M\_ indicate genera *Planktothrix* or *Microcystis*, each. *Nostoc* UIC10630 and *Nodularia* CCY9414 served as outgroups.

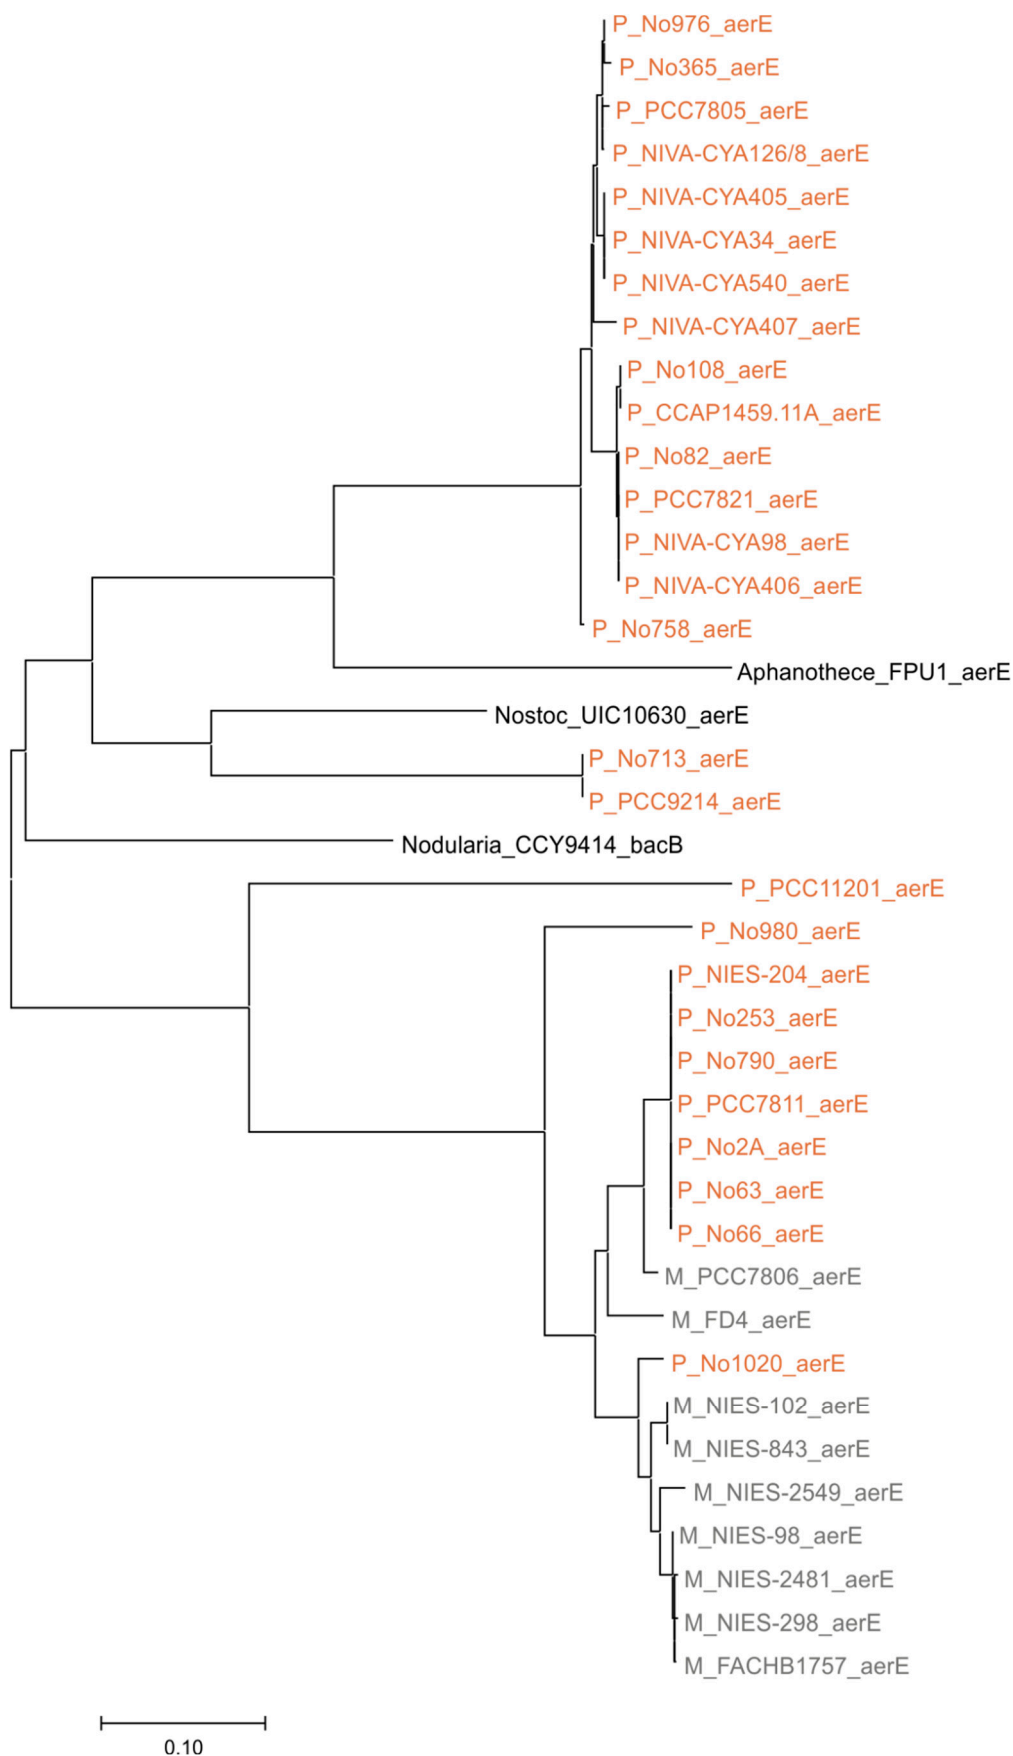

**Figure S4.** Maximum likelihood phylogenetic tree based on *aerE* (nucleotide) sequence (alignment: 756 bp). P\_, M\_ indicate genera *Planktothrix* or *Microcystis*, each. *Nostoc* UIC10630 and *Nodularia* CCY9414 served as outgroups.

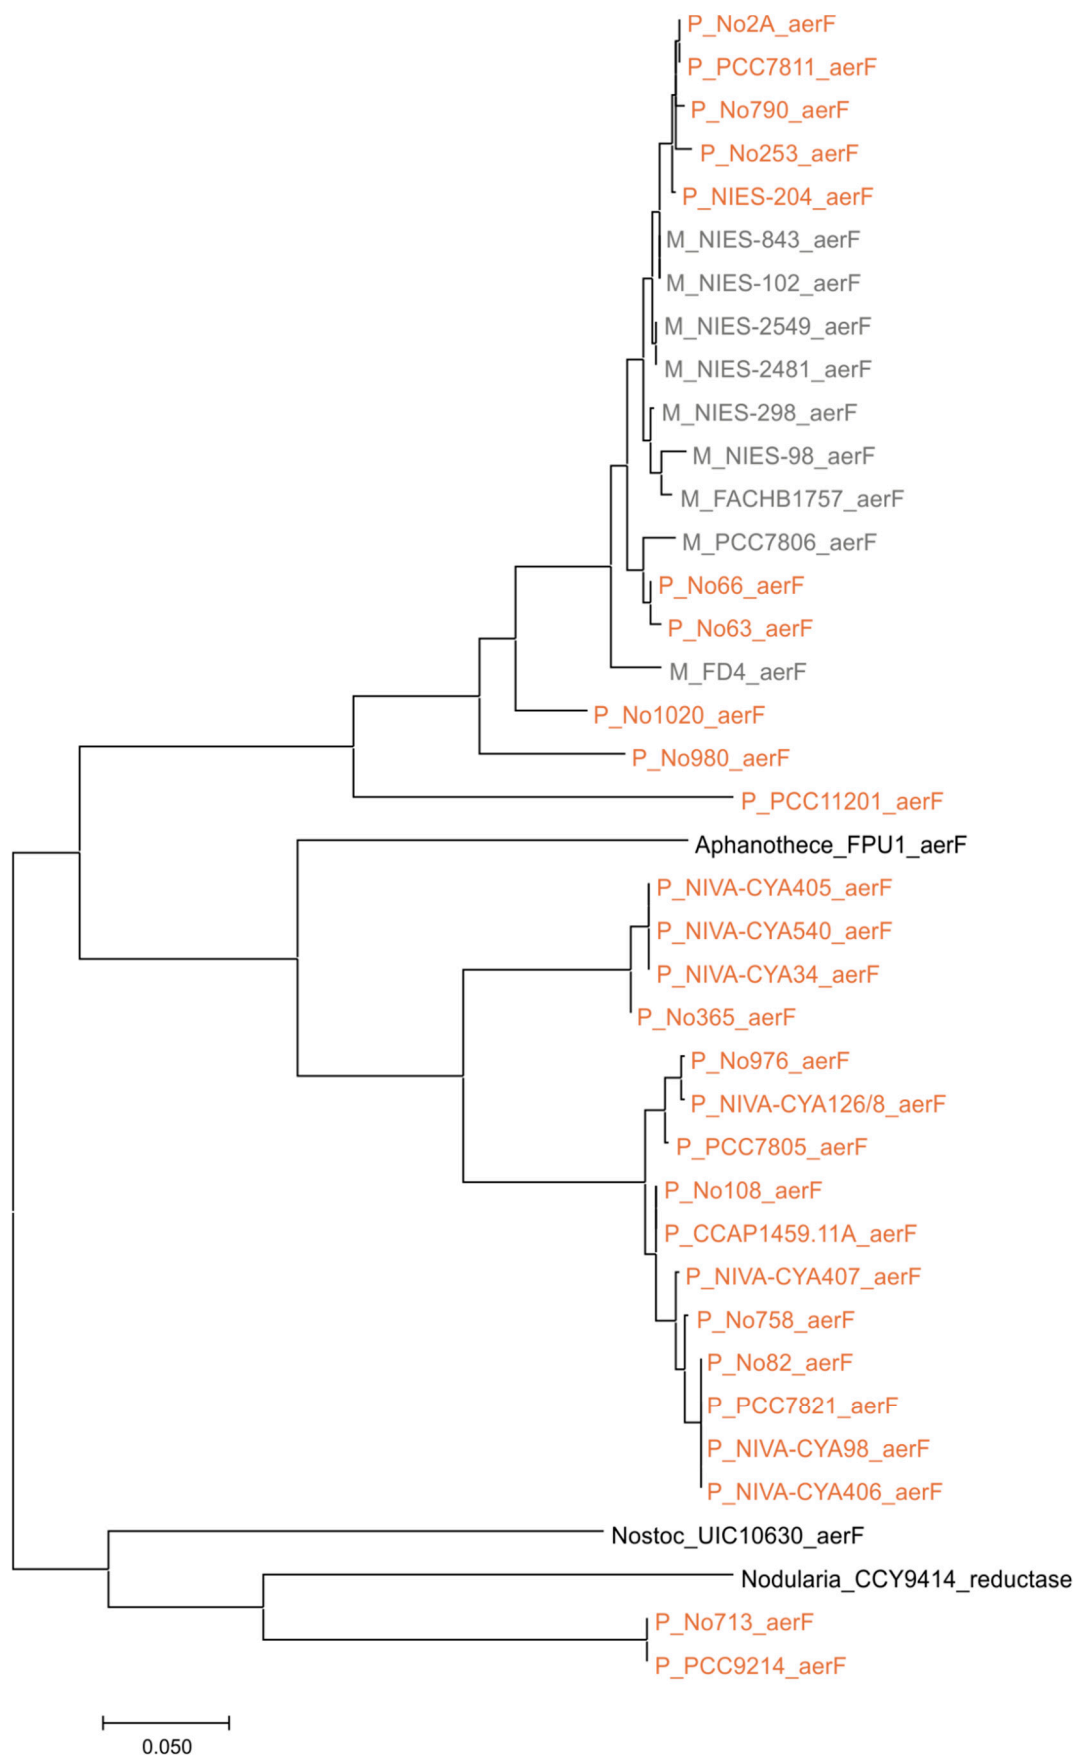

**Figure S5.** Maximum likelihood phylogenetic tree based on *aerF* (nucleotide) sequence (alignment: 801 bp). P\_, M\_ indicate genera *Planktothrix* or *Microcystis*, each. *Nostoc* UIC10630 and *Nodularia* CCY9414 served as outgroups.

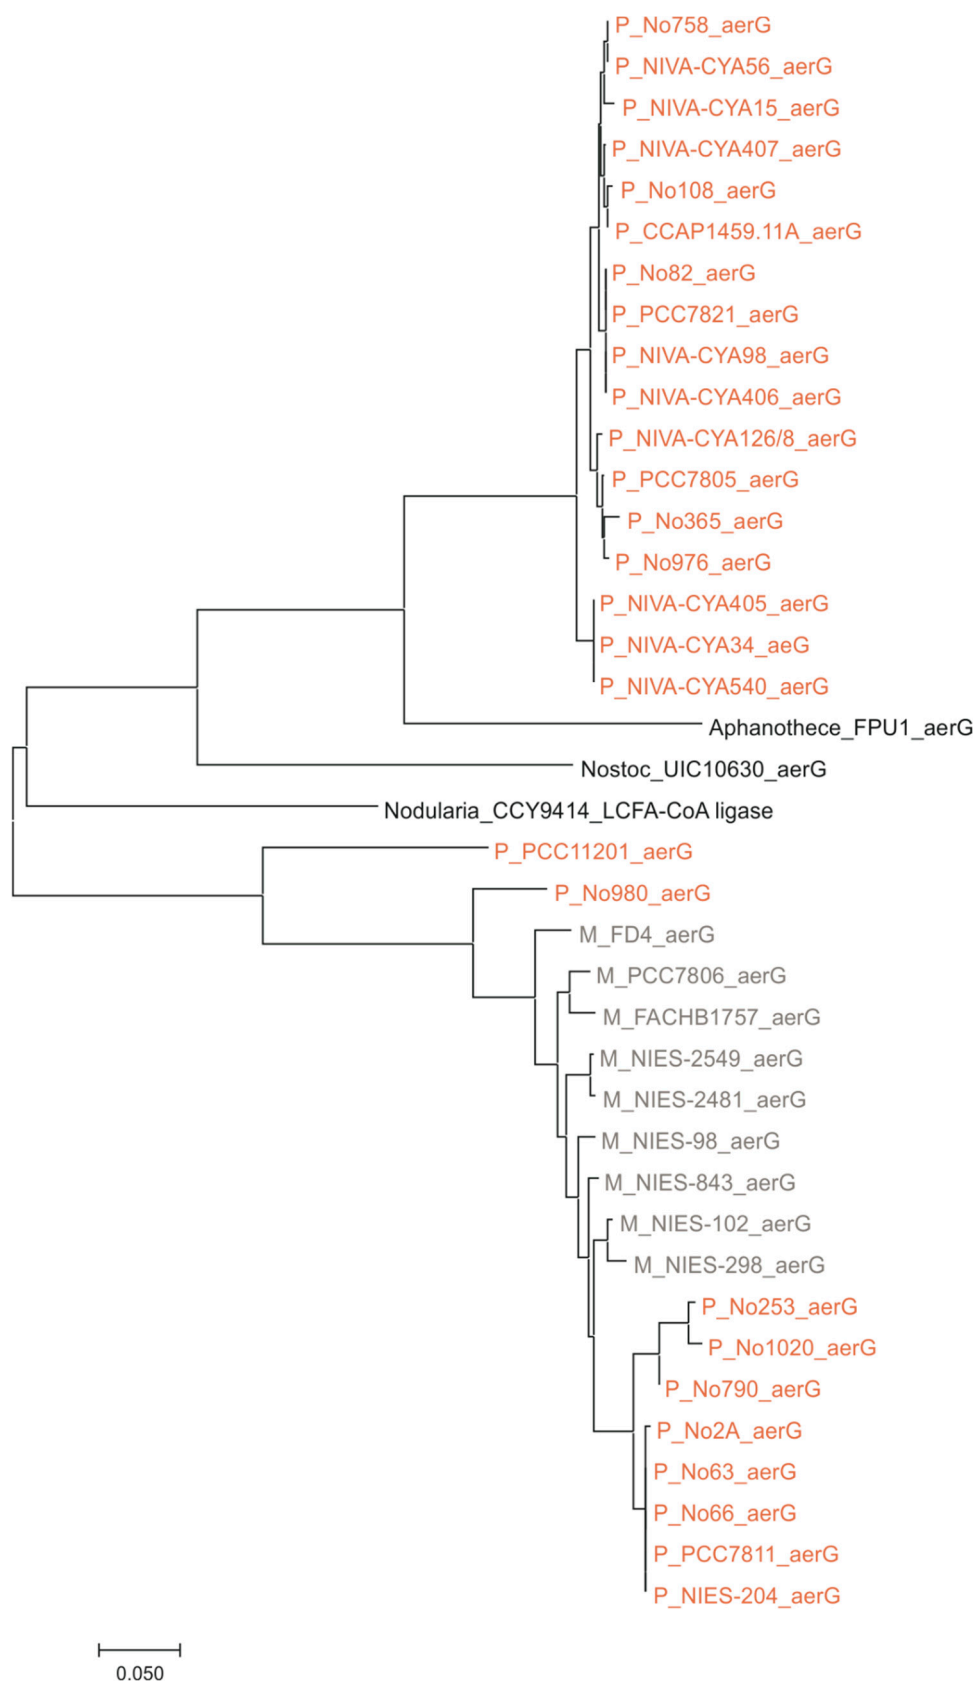

**Figure S6.** Maximum likelihood phylogenetic tree based on *aerG* (nucleotide) sequence (alignment: 3366 bp). P\_, M\_ indicate genera *Planktothrix* or *Microcystis*, each. *Nostoc* UIC10630 and *Nodularia* CCY9414 served as outgroups.

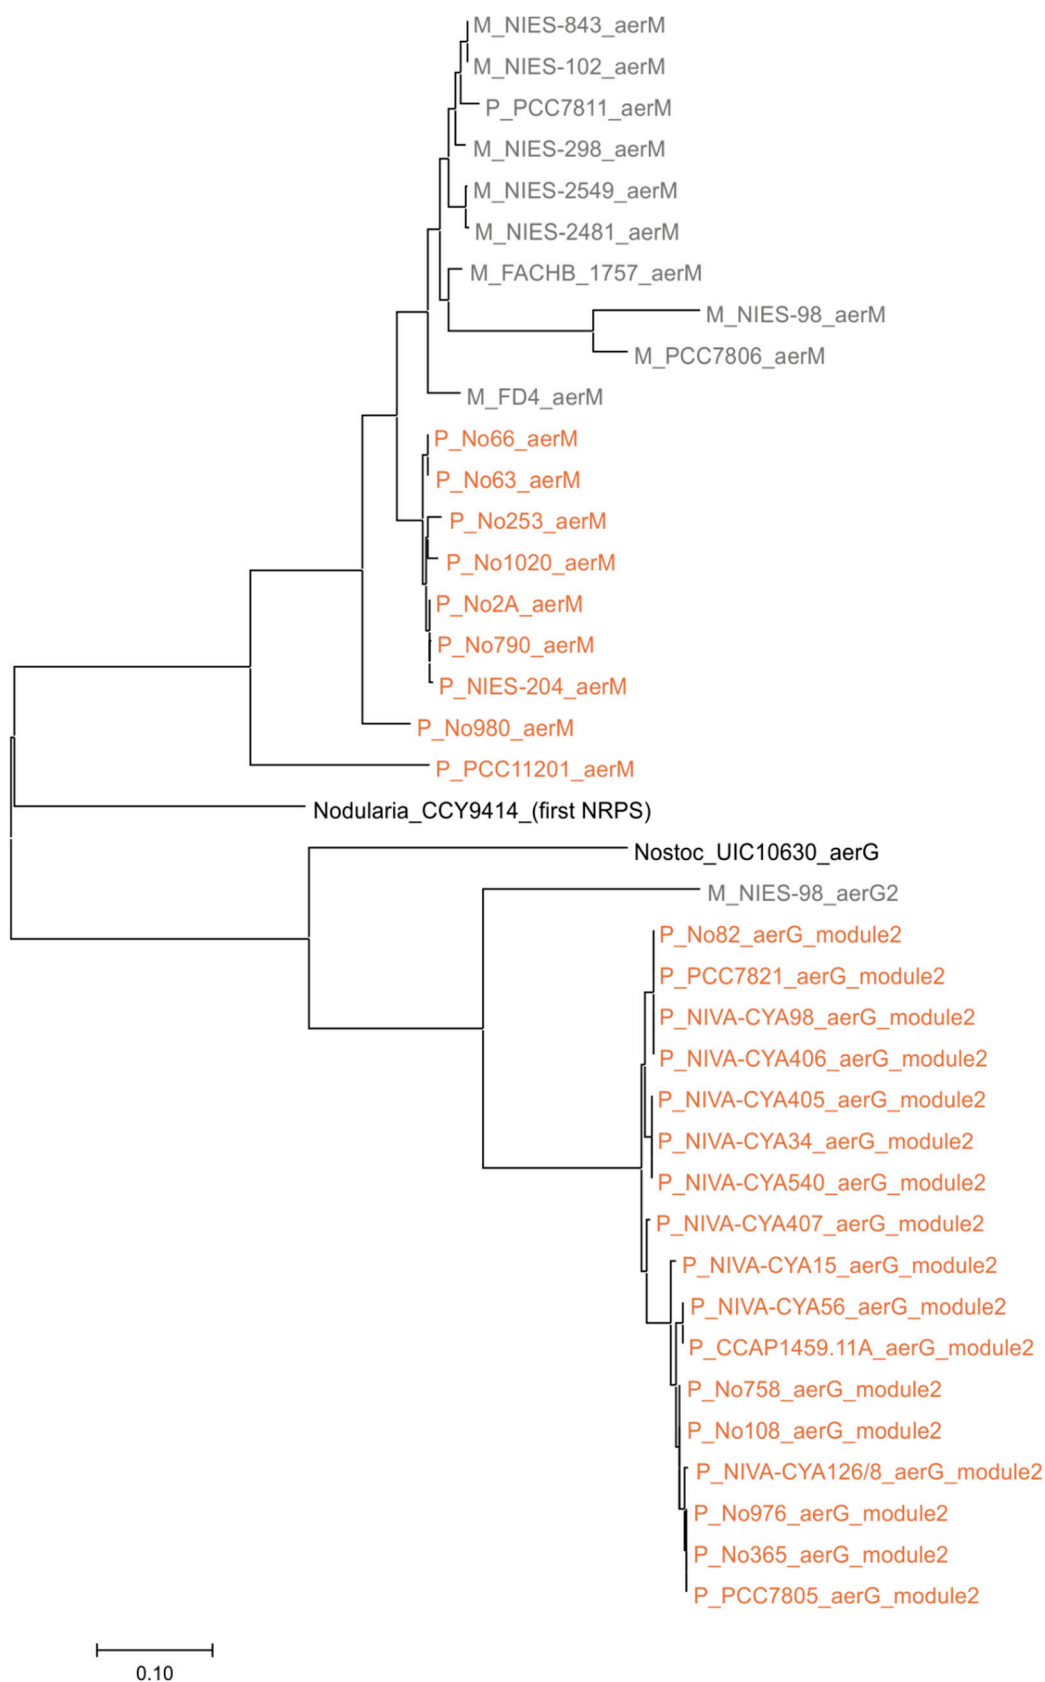

**Figure S7.** Maximum likelihood phylogenetic tree based on *aerG\_module2* and *aerM* (nucleotide) sequence (alignment: 4533 bp). P\_, M\_ indicate genera *Planktothrix* or *Microcystis*, each. *Nostoc* UIC10630 and *Nodularia* CCY9414 served as outgroups.



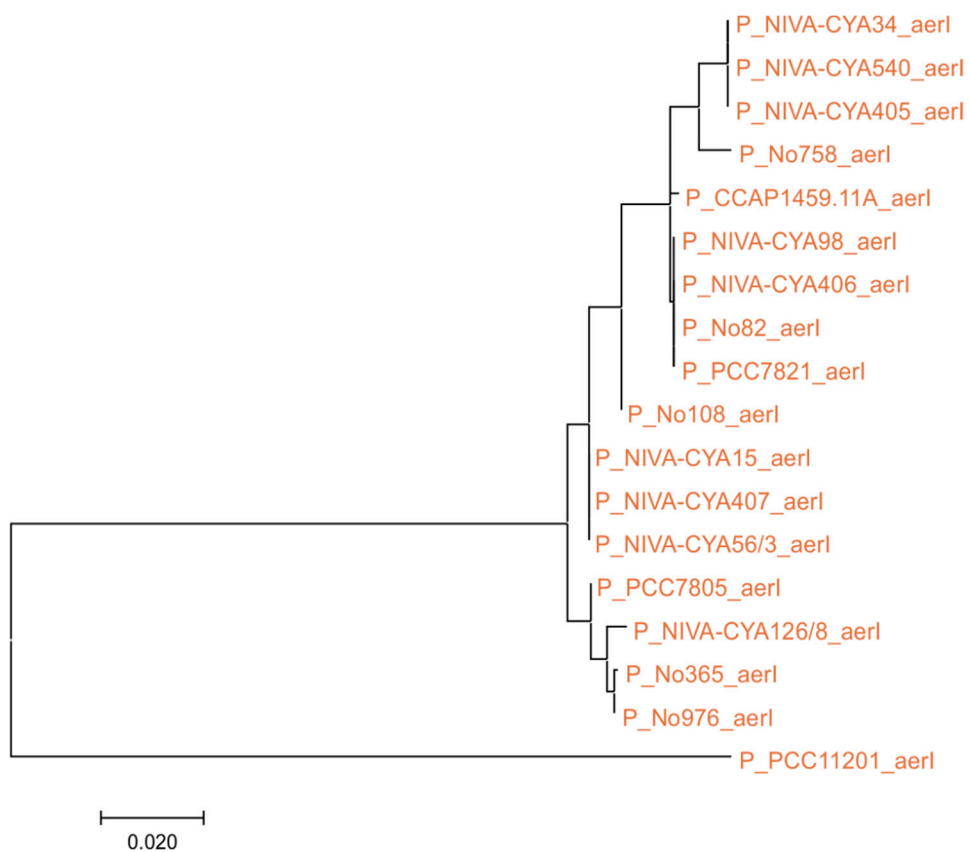

**Figure S8.** Maximum likelihood phylogenetic tree based on *aerI* (nucleotide) sequence (alignment: 1260 bp). P\_, M\_ indicate genera *Planktothrix* or *Microcystis*, each.

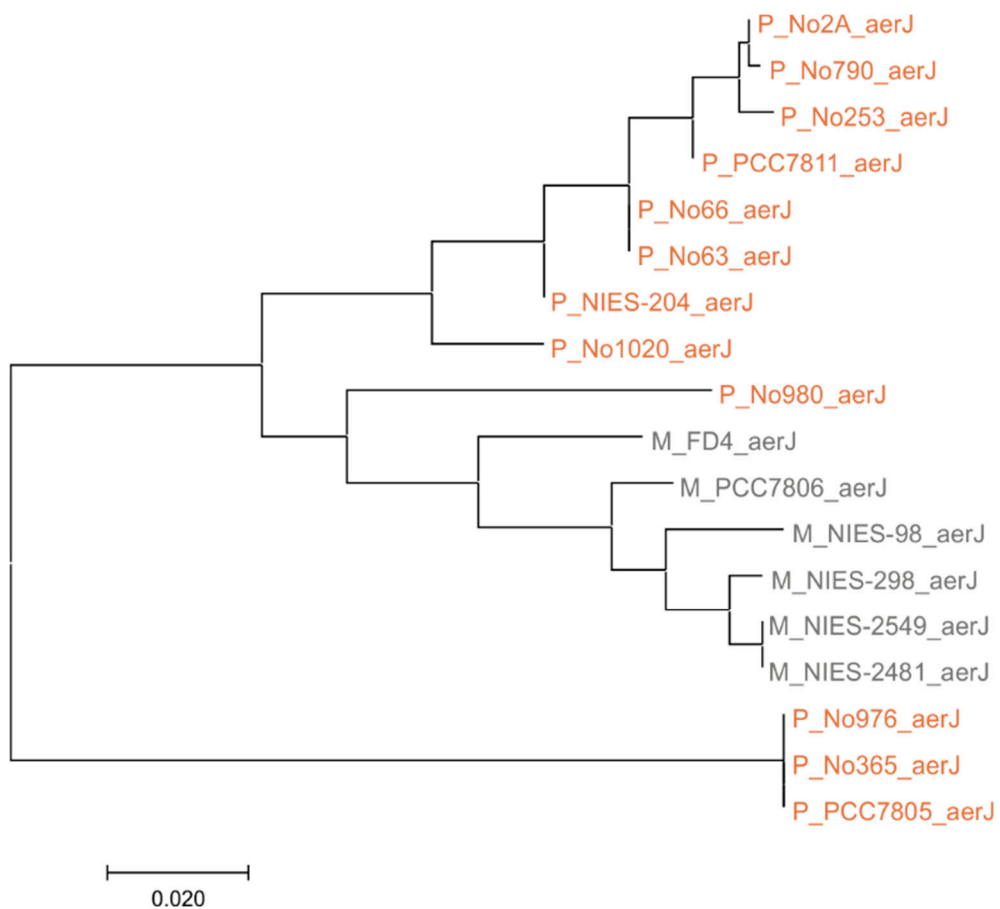

**Figure S9.** Maximum likelihood phylogenetic tree based on *aerJ* (nucleotide) sequence (alignment: 1905 bp). P\_, M\_ indicate genera *Planktothrix* or *Microcystis*, each.

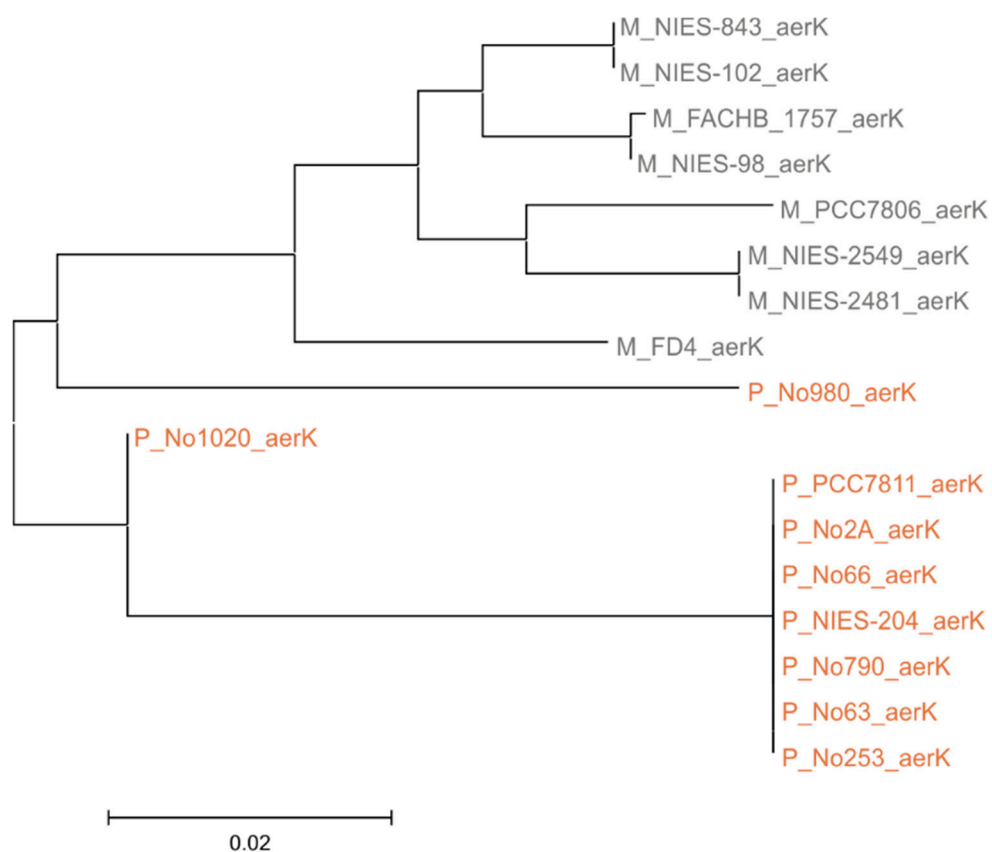

**Figure S10.** Maximum likelihood phylogenetic tree based on *aerK* (nucleotide) sequence (alignment: 1044 bp). P\_, M\_ indicate genera *Planktothrix* or *Microcystis*, each.

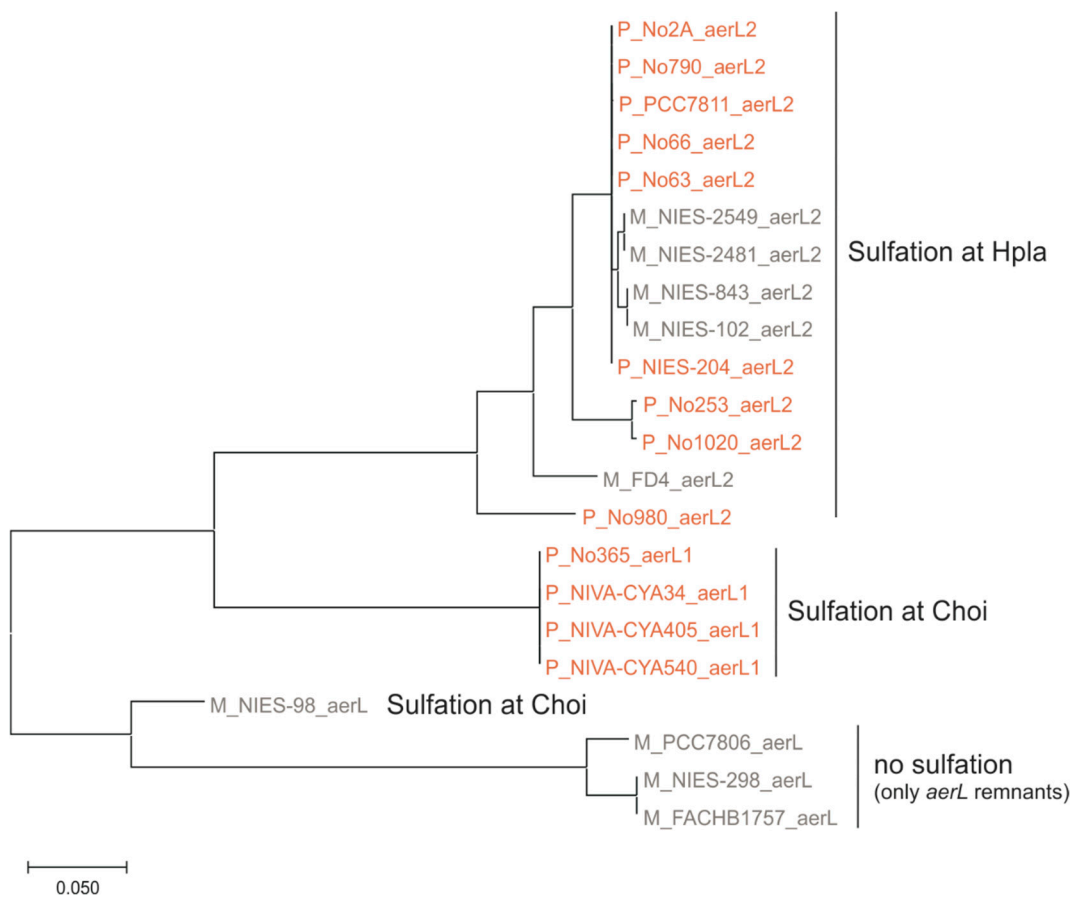

**Figure S11.** Maximum likelihood phylogenetic tree based on *aerL* (nucleotide) sequence (alignment: 1011 bp). P\_, M\_ indicate genera *Planktothrix* or *Microcystis*, each. In addition the putative sulfation reactions are indicated (Figure 4).

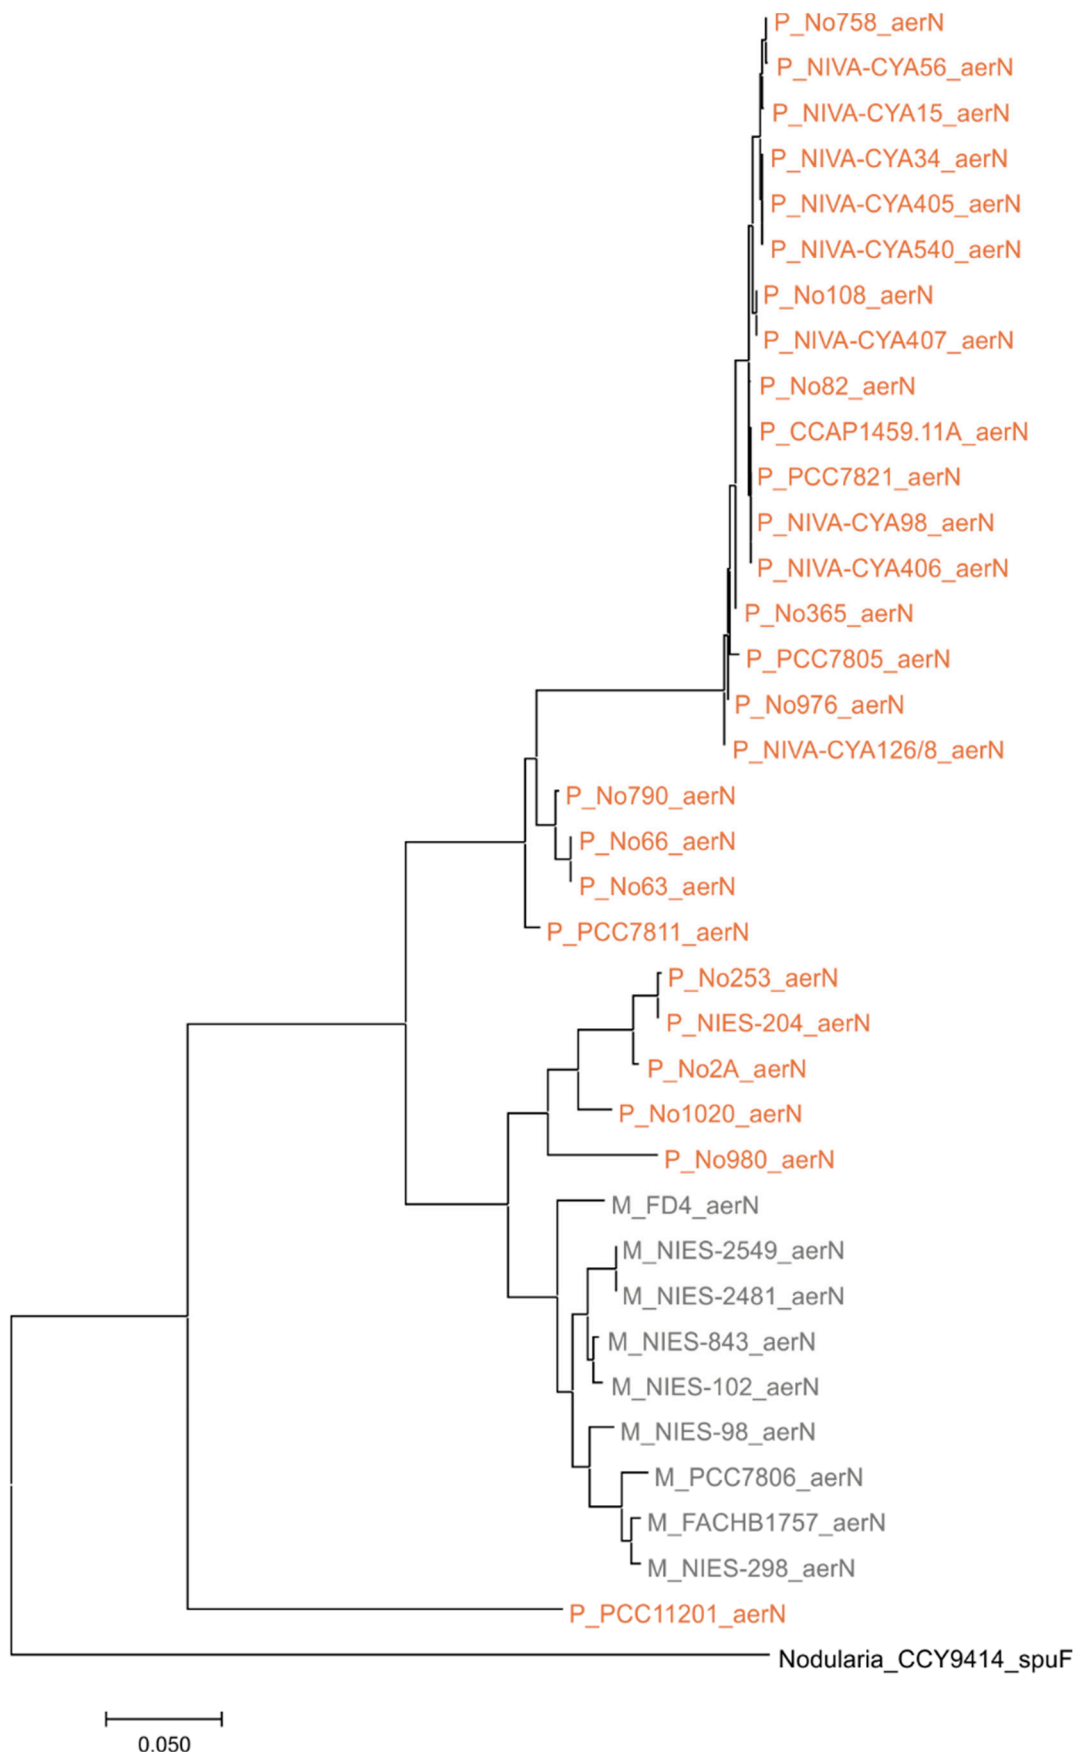

**Figure S12.** Maximum likelihood phylogenetic tree based on *aerN* (nucleotide) sequence (alignment: 2058 bp). P\_, M\_ indicate genera *Planktothrix* or *Microcystis*, each. *Nodularia* CCY9414 served as outgroup.

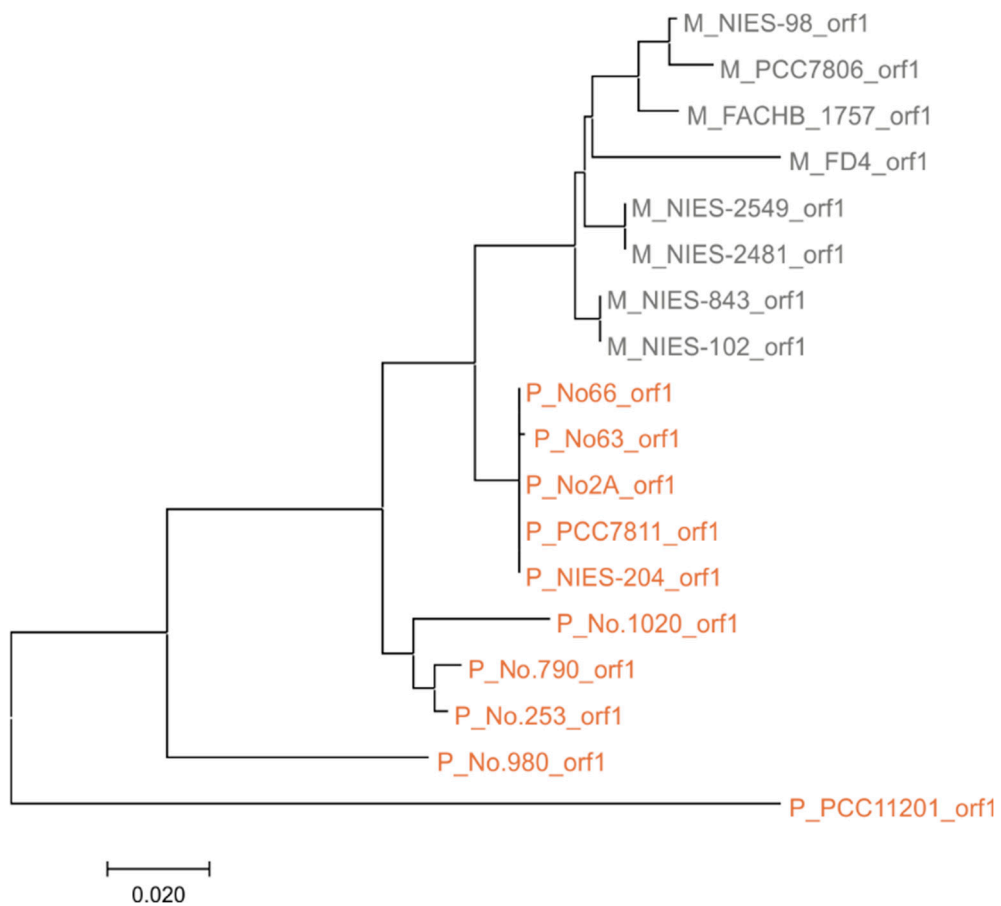

**Figure S13.** Maximum likelihood phylogenetic tree based on ORF1 (nucleotide) sequence (alignment: 786 bp). P\_, M\_ indicate genera *Planktothrix* or *Microcystis*, each.

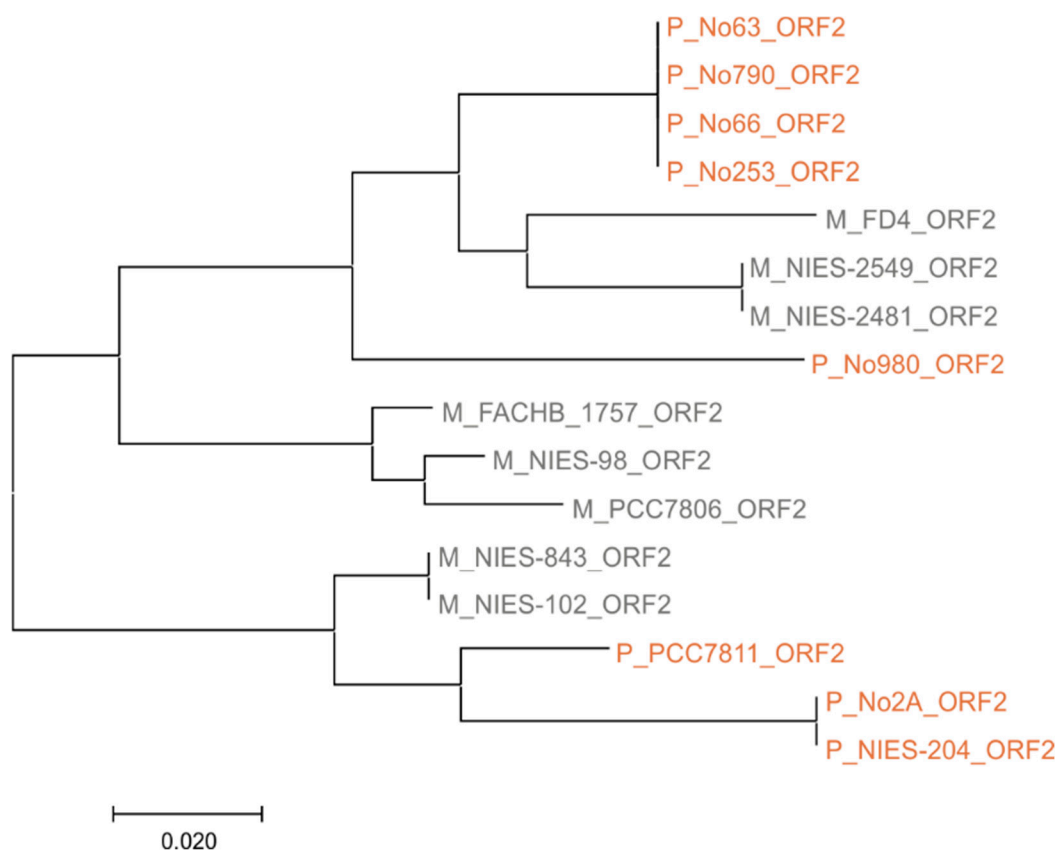

**Figure S14.** Maximum likelihood phylogenetic tree based on ORF2 (nucleotide) sequence (alignment: 627 bp). P\_, M\_ indicate genera *Planktothrix* or *Microcystis*, each.

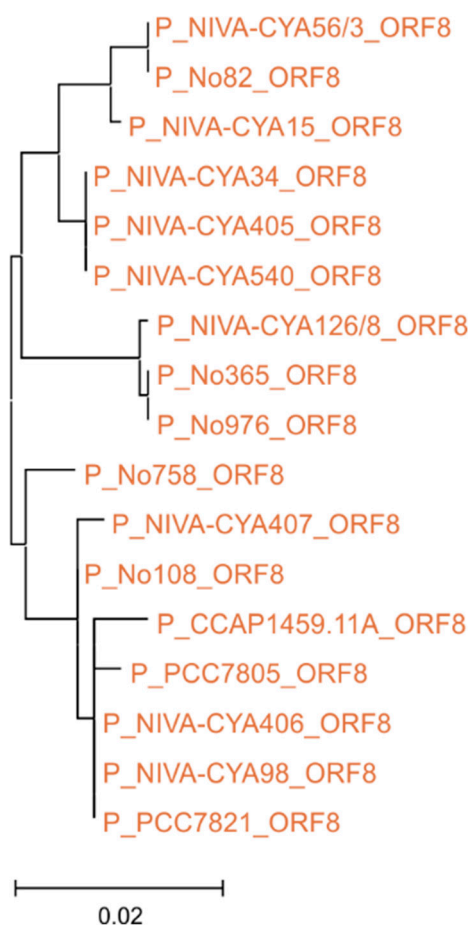

**Figure S15.** Maximum likelihood phylogenetic tree based on ORF8 (nucleotide) sequence (alignment: 1161 bp). P\_ indicates genus *Planktothrix*.



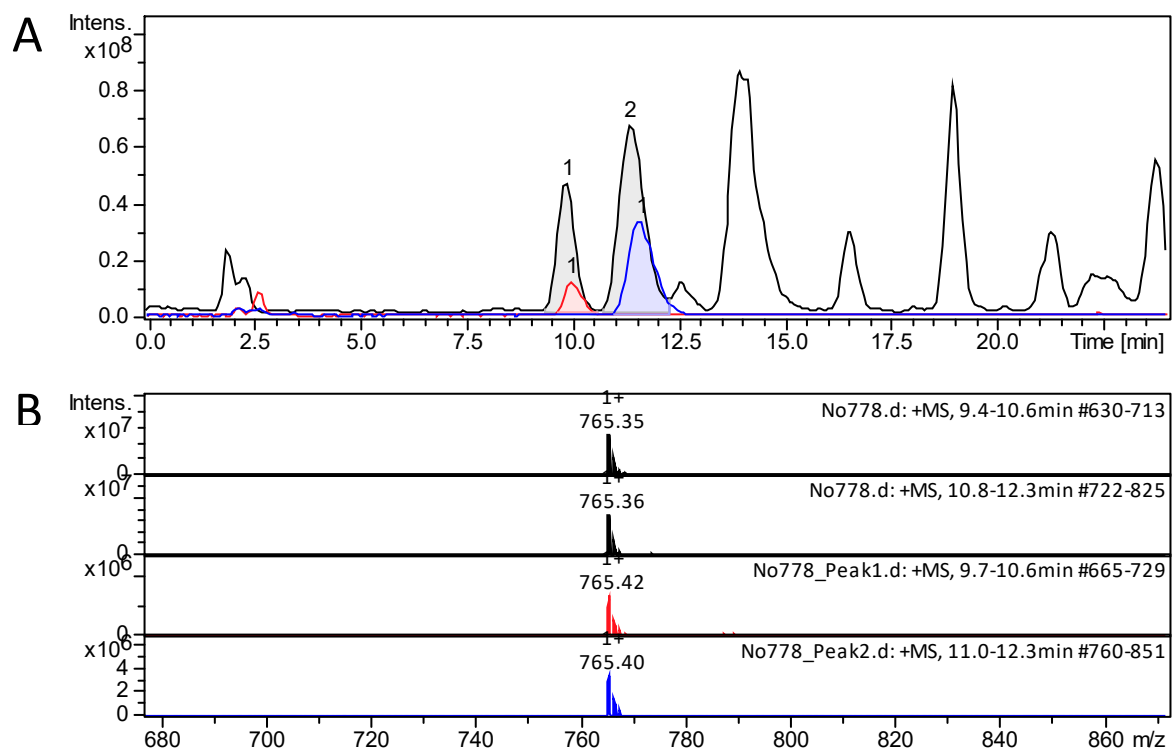

**Figure S16. (A)** Base peak chromatograms (BPC) of methanolic peptide extracts from *Planktothrix* strain No778 with first injection (black), re-injection of peak 1 (red) and re-injection of peak 2 (blue). **(B)** Mass peak chromatograms [m z<sup>-1</sup>] of peak 1 and 2 from the first injection (black), re-injection of peak 1 (red) and re-injection of peak 2 (blue); [m z<sup>-1</sup>] 765.3.

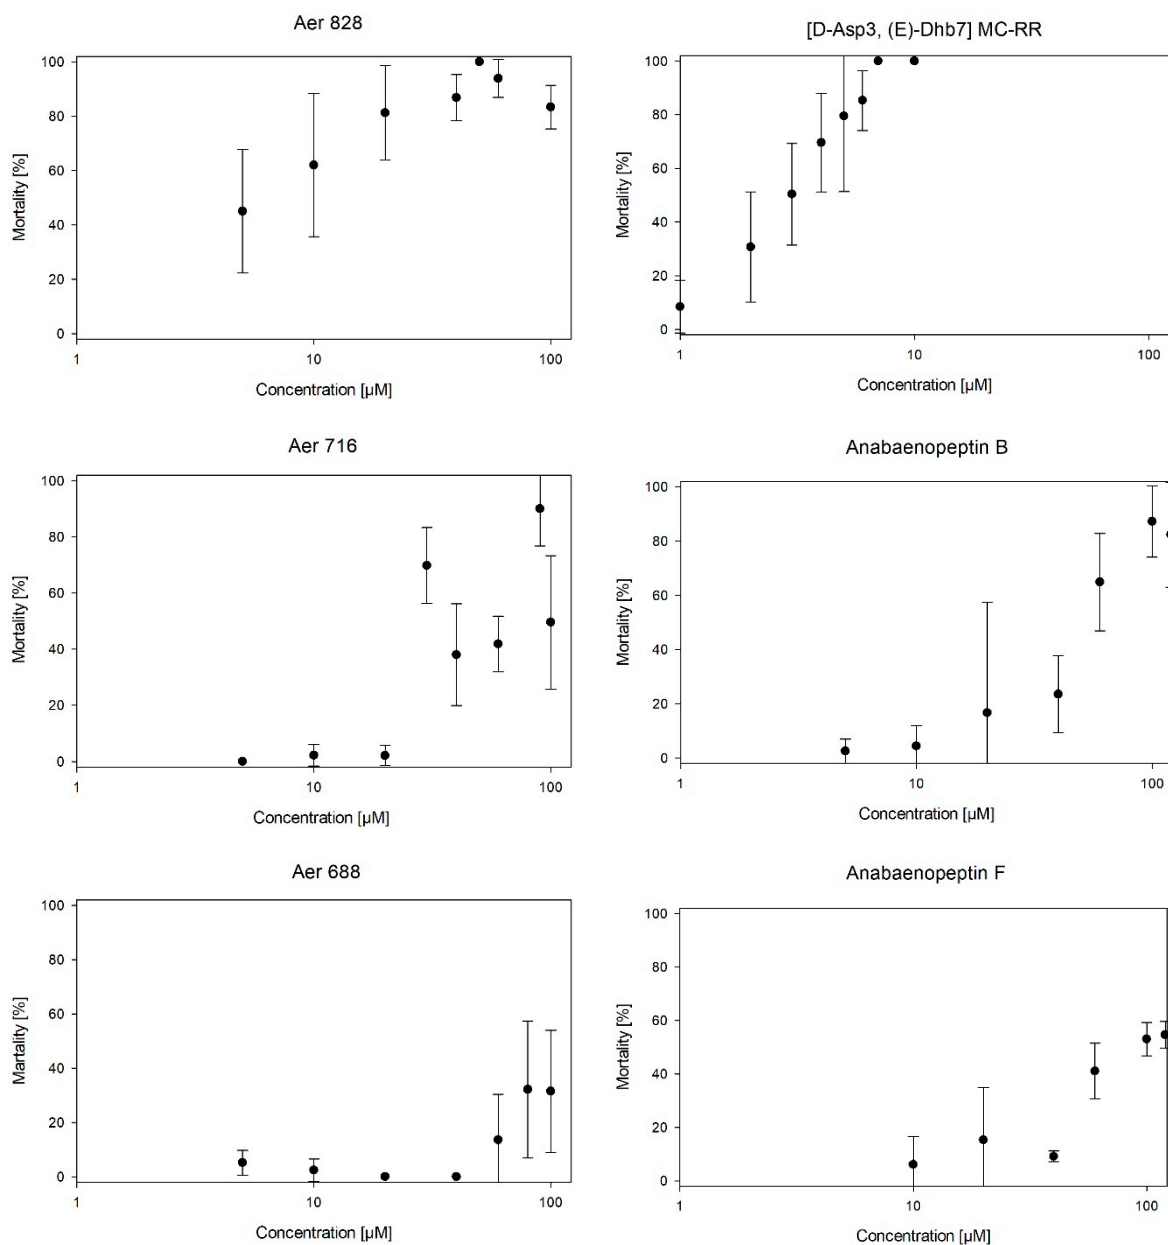

**Figure S17.** Percentage mortality (mean  $\pm$  1SD) through purified aeruginosin variants Aer 828A ( $[M+H]^+$  829.3), Aer 89 ( $[M+H]^+$  717.3), Aer 688 ( $[M+H]^+$  689.3) as inferred using a standard toxicity assay (i.e. *Thamnocephalus platyurus*) and compared with that of purified [D-Asp3, (E)-Dhb7] microcystin-RR ( $[M+H]^+$  1024), and anabaenopeptin B ( $[M+H]^+$  837) and anabaenopeptin F ( $[M+H]^+$  851).

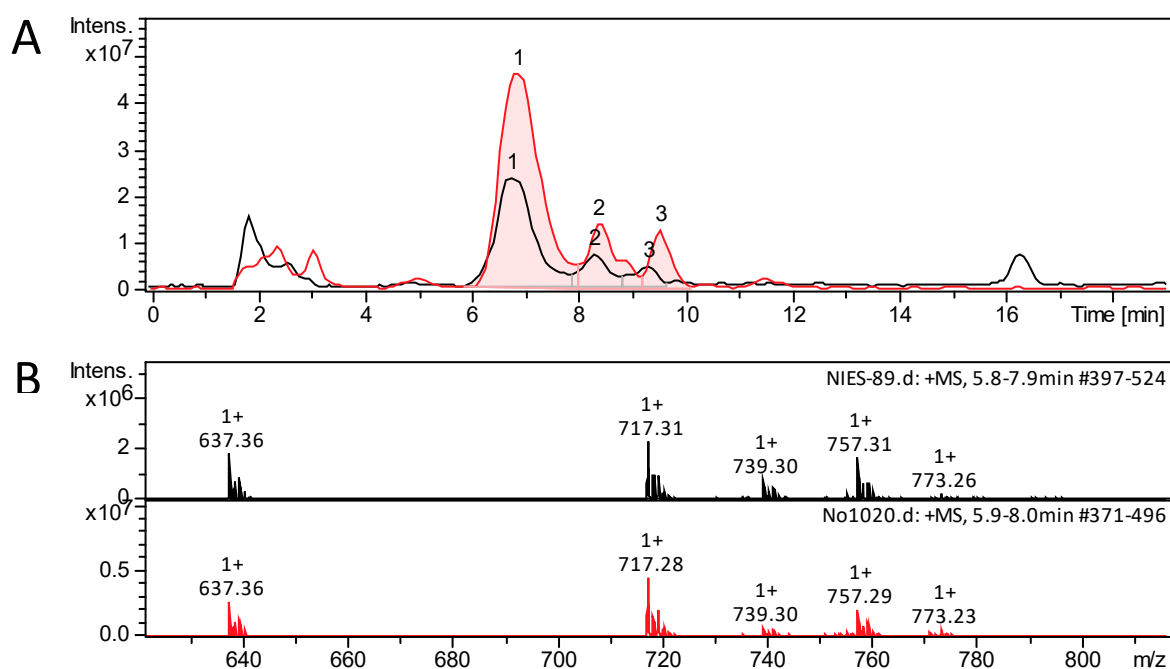

**Figure S18. (A)** Base peak chromatograms (BPC) of methanolic peptide extracts from *Microcystis* strain NIES-89 (black) and *Planktothrix* strain No1020 (red). **(B)** Mass peak chromatograms [m z<sup>-1</sup>] of NIES-89\_peak1 (black) and No1020\_peak1 (red); [M-SO<sub>3</sub>+H]<sup>+</sup> 637.3; [M+H]<sup>+</sup> 717.3; [M+Na]<sup>+</sup> 739.3; [M+K]<sup>+</sup> 757.3.

## References

26. Röttig, M.; Medema, M. H.; Blin, K.; Weber, T.; Rausch, C.; Kohlbacher, O., NRPSpredictor2--a web server for predicting NRPS adenylation domain specificity. *Nucleic Acids Res* **2011**, 39, (Web Server issue), W362-7. doi: 10.1093/nar/gkr323.
