# Supplementary material for: High Structural Diversity of Aeruginosins in Bloom-Forming Cyanobacteria of the Genus Planktothrix as a Consequence of Multiple Recombination Events
Source: Mar Drugs. 2023 Dec 13;21(12):638. doi: 10.3390/md21120638 (PMC10744761; doi:10.3390/md21120638)
Supplement: Supplementary file 1 [file marinedrugs-21-00638-s001.zip › Suppl_Tables_RK_13_12_23.xlsx]

## Sheet: Table S1. PCR conditions
Table S1: PCR primers and conditions for testing aer gene presence/absence and used for aer gene sequencing from 124 Planktothrix strains.
PCR index	Reference genome	Primer name	Primer sequence 5‘ – 3‘	TA [°C] (Phusion)	Amplicon size [bp]	Elongation time [min]	Number of analyzed strains	Sequenced strains
a	NIVA-CYA126/8	AerSc1+	GTACGGGATAGTGAATTAGTCGCT	60	2025	1	124	No63, No253, No790, No980, No1020
	NIVA-CYA126/8	AerSc1a-	TAAGGGGATTAAATATTCGGGAT
b	NIVA-CYA126/8	AerSc2+	GGCGTTAATCCCGAATATTTAATC	60	1880	1	124	No63, No253, No790
	NIVA-CYA126/8	AerSc2-	GTTCTGGGCGCTATCCATTC
c	NIVA-CYA126/8	AerSc3+	GAATGGATAGCGCCCAGAAC	60	1994	1	124
	NIVA-CYA126/8	AerSc3-	GTTTGGAAATGACCCATCAAAC
d	NIVA-CYA126/8	AerSc4+	GTTTGATGGGTCATTTCCAAAC	60	2072	1	124	No145, No161
	NIVA-CYA126/8	AerSc4a-	GGCAATGGCTGGTTTTAATA
e	NIVA-CYA126/8	AerSc5+	GGTTAGCGGTCAAGTTCCTTTAA	60	2081	1	124	No40
	NIVA-CYA126/8	AerSc5-	CTTCATCATGAAAGTTTTGTCCTAACA
f	NIVA-CYA126/8	AerSc6+	TGTTAGGACAAAACTTTCATGATGAAG	60	1844	1	124
	NIVA-CYA126/8	AerSc6-	GTCCGCTTGATACCAAAGTTCTT
g	NIVA-CYA126/8	AerSc7a+	CTATAACCTCGAAGCCATGC	60	2214	1	124
	NIVA-CYA126/8	AerSc7a-	ATTCCTGCACTAGCTCCTGT
h	NIVA-CYA126/8	AerSc8+	GGAAGAACAGCAACTAGCTTATGG	60	2007	1	124
	NIVA-CYA126/8	AerSc8-	GGATTAATACCCTAGCAGGTAGGG
i	NIVA-CYA126/8	AerSc9+	CCCTACCTGCTAGGGTATTAATCC	60	1982	1	124
	NIVA-CYA126/8	AerSc9-	CCGATCAACTTTGCCATTAGAA
j	NIVA-CYA126/8	AerSc10a+	TTCTAATGGCAAAGTTGATCG	60	2300	1	124
	NIVA-CYA126/8	AerSc10-	TGTTAACTAAATCGGGGGAAAAAC
k	NIVA-CYA126/8	AerSc11+	GTTTTTCCCCCGATTTAGTTAACA	60	2068	1	124
	NIVA-CYA126/8	AerSc11-	TGGATCAGGTATCCTCTGTTACCA
l	NIVA-CYA126/8	AerSc12+	TGGTAACAGAGGATACCTGATCCA	60	3962	1	124
	NIVA-CYA126/8	AerSc13-	TTACTTCCATCCCATTGACGC
m	NIVA-CYA126/8	AerSc14+	GCGTCAATGGGATGGAAGTAA	60	2120	1	124	No67, No372, No557
	NIVA-CYA126/8	AerSc14-	TTTGAGATCGATATGCTCTGAGC
n	NIVA-CYA126/8	AerSc15+	GCTCAGAGCATATCGATCTCAAA	60	1953	1	124
	NIVA-CYA126/8	AerSc15-	ATCGAGGGTTTTGTCATAACGAT
o	NIVA-CYA126/8, No66	AerSc3+	GAATGGATAGCGCCCAGAAC	60	3982	1	54	No806
	No66	Aer66Sc3-	GGTAAACAGGTCGCTATCATATT
p	No66	Aer66Sc4+	AATATGATAGCGACCTGTTTACC	60	2087	1	35	No980
	NIVA-CYA126/8, No66	AerSc4a-	GGCAATGGCTGGTTTTAATA
q	No66	Aer66Sc5+	GTTACAGGTGAAGTCCCCTTA	60	3545	1	40
	No66	Aer66Sc7-	CGTAATCAAAGCCACTTTATCTT
r	No66	Aer66Sc8+	AAGATAAAGTGGCTTTGATTACG	60	2812	1	40
	No66	Aer66Sc8-	AAGTTGAGACTCAATTTGGATG
s	No66	Aer66Sc9+	CATCCAAATTGAGTCTCAACTT	60	1965	1	47	No63, No253, No790, No980, No1020
	No66	Aer66Sc9-	TTTCGATTAACTTTACCATTCG
t	No66	Aer66Sc10+	CGAATGGTAAAGTTAATCGAAA	60	2159	1	50	No63
	No66	Aer66Sc10-	GGTTGACGTTTGGCTAATAGT
u	No66	Aer66Sc11+	ACTATTAGCCAAACGTCAACC	60	1911	1	39	No63, No253, No980, No1020
	No66	Aer66Sc11-	TTTCACTTGATTATCAATTCGTC
v	No66	Aer66Sc12+	GACGAATTGATAATCAAGTGAAA	60	861	1	38	No63, No253, No790, No980, No1020
	No66	Aer66Sc13-	TAACAGGAATAATCCGAGAGC
w	No66	Aer66Sc14+	GCTCTCGGATTATTCCTGTTA	60	1873	1	37	No63, No253, No790, No980, No1020
	No66	Aer66Sc14-	TGAGATTGATGCTATCTGAGG
x	No66	Aer66Sc15+	CCTCAGATAGCATCAATCTCA	60	1952	1	33	No63, No253, No790, No980, No1020
	NIVA-CYA126/8, No66	AerSc15-	ATCGAGGGTTTTGTCATAACGAT
	No980	Aer980Sc2+	AGTACCGATCAATTAGCGTTATT	60	2062	1	2	No980, No1020
	No980	Aer980Sc2-	CCTCCTAGTTCAAAGAAATTGTC
	No980	Aer980Sc2.1+	TTCTGCTAGAAAATGCTAACACC	57	approx 1 kbp	1	1	No980
	No980	Aer980Sc2.1-	TCTTGAGTTTCGTCCAGAAGT
	NIVA-CYA126/8	AerSc3+	GAATGGATAGCGCCCAGAAC	60	approx.	1	4	No63, No253, No790, No1020
	NIES-2549	Aer1020Sc3.1-	TCAAGGAAGATGGAATTAAACAT
	NIES-2549	Aer1020Sc3.1+	ATTGATAAGCGGCAATTACTCA	63	2049	1	1	No980
	NIES-2549	Aer1020Sc3.1-	TCAAGGAAGATGGAATTAAACAT
	NIES-2549	Aer1020Sc3.2+	ATGTTTAATTCCATCTTCCTTGA	63	2015	1	5	No63, No253, No790, No980, No1020
	NIES-2549	Aer1020Sc3.2-	AGGTCGCTATCATATTCCCAAA
	NIES-2549	Aer1020Sc4+	TTTGGGAATATGATAGCGACCT	63	2034	1	4	No63, No253, No790, No1020
	NIES-2549	Aer1020Sc4-	ATTGATTAAAGTGATGACGTTCG
	NIES-2549	Aer1020Sc5.1+	CGAACGTCATCACTTTAATCAAT	63	1869	1	5	No63, No253, No790, No980, No1020
	NIES-2549	Aer1020Sc5.1-	TTAAGGCATCAGCTTCTAATAATTC
	No980	Aer980Sc5+	CTTTACAGAGTTAAAGGAATCGTT	60	approx 2.3 kbp	1	1	No980
	No980	Aer980Sc8-	AATCATAATTAAACCAAGGTAACGT
	No980	Aer980Sc5.2+	TTCAATGCCAAGATACCATT	60	approx 3 kbp	1	1	No980
	NIES-2549	Aer1020Sc8.1-	TCTTCATCGGTGTAAAAATGAC
	NIES-2549, No66	Aer1020Sc5.2+	GAATTATTAGAAGCTGATGCCTTAA	63	1643	1	4	No63, No253, No790, No1020
	No66	Aer66Sc7-	CGTAATCAAAGCCACTTTATCTT
	No66	Aer66Sc8+	AAGATAAAGTGGCTTTGATTACG	63	1721	1	3	No63, No253, No790
	NIES-2549, No66	Aer1020Sc8.1-	TCTTCATCGGTGTAAAAATGAC
	NIES-2549	Aer1020Sc8+	GGATATAATTCATCGAATCAAGATAT	60	approx 2 kbp	1	1	No1020
	No980	Aer980Sc8-	AATCATAATTAAACCAAGGTAACGT
	NIES_2549, No66	Aer1020Sc8.2+	GTCATTTTTACACCGATGAAGA	63	1113	1	5	No63, No253, No790, No980, No1020
	No66	Aer66Sc8-	AAGTTGAGACTCAATTTGGATG
	NIES-2549, No66	Aer1020Sc10+	GATTATATGATTCCCTCTGCTT	63	2157	1	4	No253, No790, No980, No1020
	NIES-2549, No66	Aer1020Sc10-	AAATGTACAATTATTGCCTTTAAA
	NIES-2549, No66	Aer1020Sc11+	TTTAAAGGCAATAATTGTACATTT	63	1998	1	1	No790
	NIES-2549, No66	Aer1020Sc11-	TCGCCAATTTCAATACGAA
	NIES-2549, No66	Aer1020Sc11+	TTTAAAGGCAATAATTGTACATTT	57	approx. 1.1 kbp	1	1	No980
	No980	Aer980Sc11.1-	GCTTCAGCATCCAGACAAA
Primers for sequencing
	No145	AerSc4.1+	ATTGGCCTTCTATTTGTAGTTTAA
	No145	AerSc4.1-	TTGATAATCTTAAACGACCTGC

## Sheet: Table S2. PCR results
Table S2: PCR results for testing aer gene presence/absence in 124 Planktothrix strains.
		Length of PCR product
		Reference strain: NIVA-CYA126/8														Reference strain: No66										Reason for aerGC inactivation	Further information
		a	b	c	d	e	f	g	h	i	j	k	l	m	n	o	p	q	r	s	t	u	v	w	x
Lineage	Strain No	P1	P2	P3	P4	P5	P6	P7	P8	P9	P10	P11	P12	P14	P15	M3	M4	M5/7	M8	M9	M10	M11	M12	M14	M15
1	No2A*	2	1.9	nd	nd	nd	nd	nd	nd	nd	nd	nd	nd	nd	nd	4	2.1	3.5	2.8	2	2.2	1.9	0.9	1.9	2			* genome sequenced strain
1	No31/1	2	1.9	2	1.9	2	1.8	2.1	2	2	2.3	2.1	3	3	2	--	--	--	--	--	--	--	--	--	--			Aer biosynthetic inactive strain
1	No32	2	1.9	2	1.9	2	1.8	2.1	2	2	2.3	2.1	4	2.1	2	--	--	--	--	--	--	--	--	--	--
1	No39	2	1.9	nd	1.9	nd	nd	nd	nd	nd	nd	nd	nd	nd	2	1.8		nd	nd	nd	nd	1.9	nd	nd		Big deletion		values give the PCR product size
1	No41	2	1.9	nd	nd	nd	nd	nd	nd	nd	nd	nd	nd	nd	nd	4	2.1	3.5	2.8	2	2.2	1.9	0.9	1.9	2			green value: same size as reference strain
1	No63	2	1.9	nd	nd	nd	nd	nd	nd	nd	nd	nd	nd	nd	nd	4	2.1	3.5	2.8	2	2.2	1.9	0.9	1.9	2			blue value: bigger than reference strain
1	No66*	2	1.9	nd	nd	nd	nd	nd	nd	nd	nd	nd	nd	nd	nd	4	2.1	3.5	2.8	2	2.2	1.9	0.9	1.9	2			orange value: smaller than reference strain
1	No79	2	1.9	2	1.9	2	1.8	2.1	2	2	2.3	2.1	4	2.1	2	--	--	--	--	--	--	--	--	--	--			nd, not detected (no PCR product)
1	No250	2	1.9	nd	1.9	2.7			2	2	2.3	2.1	1.5	3	2	4	--	--	--	--	--	--	--	--	--			--, no PCR performed
1	No251	2	1.9	nd	1.9	2.7			2	2	2.3	2.1	1.5	3	2	4	--	--	--	--	--	--	--	--	--
1	No252	2	1.9	nd	1.9	2.7			2	2	2.3	2.1	1.5	2.1	2	4	--	--	--	--	--	--	--	--	--
1	No253	2	1.9	nd	nd	nd	nd	nd	nd	nd	nd	nd	nd	nd	nd	4	nd	3.5	2.8	2	2.2	1.9	0.9	1.9	2
1	No254	2	1.9	nd	1.9	2.7			2	2	2.3	2.1	1.5	2.1	2	4	--	--	--	--	--	--	--	--	--
1	No255	2	1.9	nd	1.9	2.7			2	2	2.3	2.1	1.5	3	2	4	--	--	--	--	--	--	--	--	--
1	No256	2	1.9	nd	nd	nd	nd	nd	nd	nd	nd	nd	nd	nd	nd	4	nd	3.5	2.8	2	2.2	1.9	0.9	1.9	2
1	No257	2	1.9	nd	1.9	2.7			2	2	2.3	2.1	1.5	3	2	4	--	--	--	--	--	--	--	--	--
1	No259	2	1.9	nd	nd	nd	nd	nd	nd	nd	nd	nd	nd	nd	nd	4	nd	3.5	2.8	2	nd	1.9	0.9	1.9	2
1	No263/2	2	1.9	nd	nd	nd	nd	nd	nd	nd	nd	nd	nd	nd	nd	4	nd	3.5	2.8	2	2.2	1.9	0.9	1.9	2
1	No274	2	1.9	nd	nd	nd	nd	nd	nd	nd	nd	nd	nd	nd	nd	4	nd	3.5	2.8	2	2.2	1.9	0.9	1.9	2
1	No281	2	1.9	nd	nd	nd	nd	nd	nd	nd	nd	nd	nd	nd	nd	4	nd	3.5	2.8	2	nd	1.9	0.9	1.9	2
1	No299	2	1.9	nd	nd	nd	nd	nd	nd	nd	nd	nd	nd	nd	nd	4	2.1	3.5	2.8	2	2.2	1.9	0.9	1.9	2
1	No307	2	1.9	nd	nd	nd	nd	nd	nd	nd	nd	nd	nd	nd	nd	4	nd	3.5	2.8	2	nd	1.9	0.9	1.9	2
1	No320	2	1.9	2	1.9	2	1.8	2.1	2	2	nd	2.1	1.5	3	2	--	--	--	--	--	nd	--	--	--	--
1	No354	2	1.9	2	1.9	2	1.8	2.1	3	2	2.3	2.1	0.7	2.5	2	--	--	--	--	--	--	--	--	--	--
1	No394	2	1.9	2	1.9	2.7			3	2	2.3	1.8	0.7	3	2	--	--	--	--	--	--	--	--	--	--
1	No759	2	1.9	nd	nd	nd	nd	nd	nd	nd	nd	nd	nd	nd	nd	4	2.1	3.5	2.8	2	2.2	1.9	0.9	1.9	2
1	No760	2	1.9	nd	1.9	2.7			nd	nd	nd	nd	nd	nd	2	1.8	--	--	nd	nd	nd	1.9	nd	nd	--	Big deletion
1	No781	2	1.9	nd	nd	nd	nd	nd	nd	nd	nd	nd	nd	nd	nd	4	2.1	3.5	2.8	2	2.2	1.9	0.9	1.9	2
1	No787	2	1.9	nd	nd	nd	nd	nd	nd	nd	nd	nd	nd	nd	nd	4	2.1	3.5	2.8	2	2.2	1.9	0.9	1.9	2
1	No788	2	1.9	nd	nd	nd	nd	nd	nd	nd	nd	nd	nd	nd	nd	4	nd	3.5	2.8	2	2.2	nd	0.9	1.9	2
1	No790	2	1.9	nd	nd	nd	nd	nd	nd	nd	nd	nd	nd	nd	nd	4	nd	3.5	2.8	2	2.2	nd	0.9	1.9	2
1	No828	2	1.9	nd	1.9	2	1.8	2.1	2	2	2.3	2.1	1.5	2.8	2	1.8	--	--	--	--	--	--	--	--	--
1	No829	2	1.9	nd	nd	nd	nd	nd	nd	nd	nd	nd	nd	nd	nd	4	2.1	3.5	2.8	2	2.2	1.9	0.9	1.9	2
1	No976*	2	1.9	nd	1.9	2.7			2	2	2.3	2.1	0.7	3	2	4	--	--	--	--	--	nd	--	--	--		l_P12-13: Absence 3300 kbp ORF4, 5 and 6; m_P14: Insertion 900 bp aer Methyltransferase
1	CCAP1459/15	2	1.9	nd	nd	nd	nd	nd	nd	nd	nd	nd	nd	nd	nd	4	2.1	3.5	2.8	2	2.2	1.9	0.9	1.9	2
1	NIES-596	2	1.9	nd	1.9	2.7			2	2	2.3	2.1	1.5	3	2	4	--	--	--	--	--	--	--	--	--
1	NIVA-CYA116	2	1.9	nd	nd	nd	nd	nd	nd	nd	nd	nd	nd	nd	nd	4	nd	3.5	2.8	2	nd	1.9	0.9	1.9	2
1	NIVA-CYA126/8*	2	1.9	2	1.9	2	1.8	2.1	2	2	2.3	2.1	4	2.1	2	--	--	--	--	--	--	--	--	--	--
1	PCC7805*	2	1.9	nd	1.9	2.7			2	2	2.3	2.1	1.5	3	2	4	--	--	--	--	--	--	--	--	--		c_P3: Insertion aerJ; e-g_P5-7: Deletion ORF3 and aerC; l_P12-13: Absence 2500 kbp ORF5 and 6; m_P14: Insertion 900 bp aer Methyltransferase
1	PCC7811*	2	1.9	nd	nd	nd	nd	nd	nd	nd	nd	nd	nd	nd	nd	4	2.1	3.5	2.8	2	2.2	1.9	0.9	1.9	2		c_P3: Insertion aerJ
1	PH123	2	1.9	nd	nd	nd	nd	nd	nd	nd	nd	nd	nd	nd	2	1.8	2.1	--	nd	nd	nd	nd	nd	nd	--	Big deletion
1	SAG5.81	2	1.9	nd	nd	nd	nd	nd	nd	nd	nd	nd	nd	nd	nd	4	nd	3.5	2.8	2	2.2	1.9	0.9	3	2
1A	No277	2	1.9	nd	1.9	2.7			2	2	2.3	2.1	1.5	3	2	4	--	--	--	--	--	--	--	--	--	Unknown
1A	No364	2	1.9	nd	1.9	2	1.8	2.1	3	2	2.3	2.1	0.7	3	2	4	--	--	--	--	--	--	--	--	--
1A	No365*	2	1.9	nd	1.9	2	1.8	2.1	3	2	2.3	2.1	0.7	3	2	4	--	--	--	--	--	--	--	--	--		h_P8: Insertion 1050 bp, aerL; l_P12-13: Absence 3300 kbp ORF4, 5 and 6; m_P14: Insertion 931 bp aer Methyltransferase
1A	No371	2	1.9	2	1.9	2	1.8	2.1	2	2	4.4		0.7	3	2	--	--	--	--	--	--	--	--	--	--
1A	No372	2	1.9	2	1.9	2	1.8	2.1	2	2	4.4		0.7	2.5	2	--	--	--	--	--	--	--	--	--	--
1A	No384	2	1.9	nd	1.9	2	1.8	2.1	3	2	2.3	2.1	0.7	3	2	4	--	--	--	--	--	--	--	--	--
1A	No390	2	1.9	2	1.9	2.7			3	2	2.3	1.6	1.5	3	2	--	--	--	--	--	--	--	--	--	--
1A	No396	2	1.9	2	1.9	2	1.8	2.1	3	2	2.3	2.1	0.7	2.5	2	--	--	--	--	--	--	--	--	--	--
1A	No553	2	1.9	2	1.9	2	1.8	2.1	2	2	4.4		0.7	2.5	2	--	--	--	--	--	--	--	--	--	--
1A	No557	2	1.9	2	1.9	2	1.8	2.1	2	2	4.4		0.7	2.5	2	--	--	--	--	--	--	--	--	--	--
2	No3	2	1.9	2	1.9	2	1.8	2.1	2	2	2.3	2.1	0.7	2.1	2	--	--	--	--	--	--	--	--	--	--
2	No21-	2	1.9	2	1.9	1.8	1.8	2.1	2	2	2.3	2.1	0.7	2.1	2	--	--	--	--	--	--	--	--	--	--	e: Deletion at aerB end	e_P5: Deletion 514 bp aerB end and ORF3 beginning
2	No40	2	1.9	2	1.9	1.8	1.8	2.1	2	2	2.3	2.1	0.7	2.1	2	--	--	--	--	--	--	--	--	--	--	e: Deletion at aerB end
2	No64	2	1.9	2	1.9	1.8	1.8	2.1	2	2	2.3	2.1	0.7	2.1	2	--	--	--	--	--	--	--	--	--	--	e: Deletion at aerB end
2	No67	2	1.9	2	1.9	2	0.6	2.1	2	2	2.3	2.1	0.7	1.8	2	--	--	--	--	--	--	--	--	--	--		m_P14: two small deletions 231 bp (ORF7) and 30 bp (IGS)
2	No80	2	1.9	2	1.9	2	1.8	2.1	2	2	2.3	2.1	0.7	2.1	2	--	--	--	--	--	--	--	--	--	--
2	No82*	2	1.9	2	1.9	2	1.8	2.1	2	2	2.3	2.1	0.7	2.1	2	--	--	--	--	--	--	--	--	--	--		l_P12-13: Absence 3300 kbp ORF4, 5 and 6
2	No83	2	1.9	2	1.9	2	1.8	2.1	2	2	2.3	2.1	0.7	2.1	2	--	--	--	--	--	--	--	--	--	--
2	No91/1	2	1.9	2	1.9	2	1.8	2.1	2	2	2.3	2.1	0.7	2.1	2	--	--	--	--	--	--	--	--	--	--
2	No97	2	1.9	2	1.9	2	1.8	2.1	2	2	2.3	2.1	0.7	2.1	2	--	--	--	--	--	--	--	--	--	--
2	No108*	2	1.9	2	1.9	2.7			2	2	2.3	2.1	0.7	2.1	2	--	--	--	--	--	--	--	--	--	--		e-g_P5-7: Deletion ORF3 and aerC; l_P12-13: Absence 3300 kbp ORF4, 5 and 6
2	No110	2	1.9	2	1.9	3			2	2	2.3	2.1	1.5	2.1	2	--	--	--	--	--	--	--	--	--	--	Unknown
2	No111	2	1.9	2	1.9	2	1.8	2.1	2	2	2.3	2.1	0.7	2.1	2	--	--	--	--	--	--	--	--	--	--
2	No139	2	1.9	2	3	2	1.8	2.1	2	2	2.3	2.1	0.7	2.1	2	--	--	--	--	--	--	--	--	--	--	d: IS element within aerB
2	No145	2	1.9	2	3	2	1.8	2.1	2	2	2.3	2.1	0.7	2.1	2	--	--	--	--	--	--	--	--	--	--	d: IS element within aerB	IS 630 within aerB
2	No161	2	1.9	2	3	2	1.8	2.1	2	2	2.3	2.1	0.7	2.1	2	--	--	--	--	--	--	--	--	--	--	d: IS element within aerB	IS 630 within aerB
2	No166	2	1.9	2	3	2	1.8	2.1	2	2	2.3	2.1	0.7	2.1	2	--	--	--	--	--	--	--	--	--	--	d: IS element within aerB
2	No169	2	1.9	2	3	2	1.8	2.1	2	2	2.3	2.1	0.7	2.1	2	--	--	--	--	--	--	--	--	--	--	d: IS element within aerB
2	No170	2	1.9	2	3	2	1.8	2.1	2	2	2.3	2.1	0.7	2.1	2	--	--	--	--	--	--	--	--	--	--	d: IS element within aerB
2	No178	2	1.9	2	3	2	1.8	2.1	2	2	2.3	2.1	0.7	2.1	2	--	--	--	--	--	--	--	--	--	--	d: IS element within aerB
2	No260	2	1.9	nd	1.9	nd	nd	nd	nd	nd	nd	nd	nd	nd	2	1.8	--	nd	nd	nd	nd	1.9	nd	nd	--	Big deletion
2	No403	2	1.9	2	1.9	2	1.8	2.1	2	2	2.3	2.1	0.7	2.1	2	--	--	--	--	--	--	--	--	--	--
2	No405	2	1.9	2	1.9	2	1.8	2.1	2	2	2.3	2.1	0.7	2.1	2	--	--	--	--	--	--	--	--	--	--
2	No406	2	1.9	2	1.9	2	1.8	2.1	2	2	2.3	2.1	0.7	2.1	2	--	--	--	--	--	--	--	--	--	--
2	No496/1	2	1.9	2	1.9	2	1.8	2.1	2	2	2.3	2.1	0.7	2.1	2	--	--	--	--	--	--	--	--	--	--
2	No550	2	1.9	2	1.9	2	1.8	2.1	2	2	2.3	2.1	0.7	2.1	2	--	--	--	--	--	--	--	--	--	--
2	No551	2	1.9	2	1.9	2	1.8	2.1	2	2	2.3	2.1	0.7	2.1	2	--	--	--	--	--	--	--	--	--	--
2	No761	2	1.9	2	1.9	1.8	1.8	2.1	2	2	2.3	2.1	0.7	2.1	2	--	--	--	--	--	--	--	--	--	--	e: Deletion at aerB end
2	No762	2	1.9	2	1.9	1.8	1.8	2.1	2	2	nd	2.1	0.7	2.1	2	--	--	--	--	--	nd	--	--	--	--	e: Deletion at aerB end	j_P10: no successful bridging
2	No776	2	1.9	2	1.9	2	1.8	2.1	2	2	2.3	2.1	1.5	2.1	2	--	--	--	--	--	--	--	--	--	--
2	No778	2	1.9	2	1.9	2	1.8	2.1	2	2	2.3	2.1	1.5	2.1	2	--	--	--	--	--	--	--	--	--	--
2	No804	2	1.9	2	1.9	2	1.8	2.1	2	2	2.3	2.1	0.7	2.1	2	--	--	--	--	--	--	--	--	--	--
2	No806	2	1.9	nd	1.9	nd	1.8	2.1	2	2	2.3	1.8	0.7	2.1	2	1.8	--	nd	--	--	--	--	--	--	--		c_M3: more similar to No66 than to NICA-CYA126/8
2	No808	2	1.9	nd	1.9	nd	1.8	2.1	2	2	2.3	1.8	0.7	2.1	2	1.8	--	nd	--	--	--	--	--	--	--
2	No839	2	1.9	2	1.9	2	1.8	2.1	2	2	2.3	2.1	1.5	2.1	2	--	--	--	--	--	--	--	--	--	--
2	CCAP1459.11A	2	1.9	2	1.9	2	1.8	2.1	2	2	2.3	2.1	0.7	2.1	2	--	--	--	--	--	--	--	--	--	--	Point mutation within aerB >Stop codon
2	CCAP1459.16	2	1.9	2	1.9	2	1.8	2.1	2	2	2.3	2.1	0.7	2.1	2	--	--	--	--	--	--	--	--	--	--	Maybe similar to CCAP 1459.11A
2	CCAP1459.17	2	1.9	2	1.9	2	1.8	2.1	2	2	2.3	2.1	0.7	2.1	2	--	--	--	--	--	--	--	--	--	--	Maybe similar to CCAP 1459.11A
2	CCAP1459.30	2	1.9	2	1.9	2	1.8	2.1	2	2	2.3	2.1	0.7	2.1	2	--	--	--	--	--	--	--	--	--	--
2	CCAP1459.31	2	1.9	2	1.9	5.9			2	1.6	nd	nd	nd	2.1	2	--	--	--	--	--	nd	nd	nd	--	--	Deletion	j-l_P10-13: no successful bridging
2	NIVA-CYA98*	2	1.9	2	1.9	2	1.8	2.1	2	2	2.3	2.1	0.7	2.1	2	--	--	--	--	--	--	--	--	--	--
2	NIVA-CYA406*	2	1.9	2	1.9	2	1.8	2.1	2	2	2.3	2.1	0.7	2.1	2	--	--	--	--	--	--	--	--	--	--
2	NIVA-CYA407*	2	1.9	2	1.9	2	nd	nd	2	2	1.5	2.1	1.5	2.1	2	--	--	--	--	--	--	--	--	--	--	j: Deletion within aerG
2	NIVA-CYA540*	2	1.9	2	1.9	2	1.8	2.1	3	2	2.3	1.8	1.5	2.1	2	--	--	--	--	--	--	--	--	--	--		h_P8: Insertion 1050 bp, aerL; k_ P11: Deletion 276 bp at aerH
2	PCC7821*	2	1.9	2	1.9	2	1.8	2.1	2	2	2.3	2.1	0.7	2.1	2	--	--	--	--	--	--	--	--	--	--
2A	No757	2	1.9	2	1.9	2	0.6	2.1	2	nd	nd	1.8	0.7	2.1	2	--	--	--	--	nd	nd	--	--	--	--	i/j: Deletion within aerG
2A	No758*	2	1.9	2	1.9	2	0.6	2.1	2	nd	nd	1.8	0.7	2.1	2	--	--	--	--	nd	nd	--	--	--	--	i/j: Deletion within aerG	f_P6: Deletion 1214 bp within aerC; i-j: Deletion 1286 bp within aerG
2A	No763	2	1.9	2	1.9	2	0.6	2.1	2	nd	nd	1.8	0.7	2.1	2	--	--	--	--	nd	nd	--	--	--	--	i/j: Deletion within aerG
2A	No764	2	1.9	2	1.9	2	0.6	2.1	2	nd	nd	1.8	0.7	2.1	2	--	--	--	--	nd	nd	--	--	--	--	i/j: Deletion within aerG
2A	No765	2	1.9	2	1.9	2	0.6	2.1	2	nd	nd	1.8	0.7	2.1	2	--	--	--	--	nd	nd	--	--	--	--	i/j: Deletion within aerG
2A	No766	2	1.9	2	1.9	2	0.6	2.1	2	nd	nd	1.8	0.7	2.1	2	--	--	--	--	nd	nd	--	--	--	--	i/j: Deletion within aerG
2A	No769	2	1.9	2	1.9	2	0.6	2.1	2	nd	nd	1.8	0.7	2.1	2	--	--	--	--	nd	nd	--	--	--	--	i/j: Deletion within aerG
2A	No770	2	1.9	2	1.9	2	0.6	2.1	2	nd	nd	1.8	0.7	2.1	2	--	--	--	--	nd	nd	--	--	--	--	i/j: Deletion within aerG
2A	No771	2	1.9	2	1.9	2	0.6	2.1	2	nd	nd	1.8	0.7	2.1	2	--	--	--	--	nd	nd	--	--	--	--	i/j: Deletion within aerG
2A	No772	2	1.9	2	1.9	2	0.6	2.1	2	nd	nd	1.8	0.7	2.1	2	--	--	--	--	nd	nd	--	--	--	--	i/j: Deletion within aerG
2A	No873	2	1.9	nd	1.9	nd	nd	nd	nd	2	2.3	2.1	1.5	2.1	2	1.8	--	nd	nd	--	--	--	--	--	--	Big deletion
2A	CCAP1459.36	2	1.9	2	1.9	2	1.8	2.1	3	2	2.3	1.8	1.5	2.1	2	--	--	--	--	--	--	--	--	--	--
2A	NIVA-CYA15*	2	1.9	2	nd	nd	nd	nd	nd	nd	2.3	2.1	1.5	2.1	2	--	nd	nd	nd	--	--	--	--	--	--	Big deletion
2A	NIVA-CYA34D*	2	1.9	2	1.9	2	1.8	2.1	3	2	2.3	1.8	1.5	2.1	2	--	--	--	--	--	--	--	--	--	--		h_P8: Insertion 1050 bp, aerL
2A	NIVA-CYA56/3*	2	1.9	2	1.9	nd	nd	nd	nd	2	2.3	2.1	1.5	2.1	2	--	--	nd	nd	--	--	--	--	--	--	Big deletion
2A	NIVA-CYA405*	2	1.9	2	1.9	2	1.8	2.1	3	2	2.3	1.8	1.5	2.1	2	--	--	--	--	--	--	--	--	--	--		h_P8: Insertion 1050 bp, aerL
3	No704	nd	nd	nd	nd	nd	nd	nd	nd	nd	nd	nd	nd	nd	nd	nd	nd	nd	nd	nd	nd	nd	nd	nd	nd	No aer genes
3	No707	nd	nd	nd	nd	nd	nd	nd	nd	nd	nd	nd	nd	nd	nd	nd	nd	nd	nd	nd	nd	nd	nd	nd	nd	No aer genes
3	No708	nd	nd	nd	nd	nd	nd	nd	nd	nd	nd	nd	nd	nd	nd	nd	nd	nd	nd	nd	nd	nd	nd	nd	nd	No aer genes
3	No710	nd	nd	nd	nd	nd	nd	nd	nd	nd	nd	nd	nd	nd	nd	nd	nd	nd	nd	nd	nd	nd	nd	nd	nd	No aer genes
3	No711	nd	nd	nd	nd	nd	nd	nd	nd	nd	nd	nd	nd	nd	nd	nd	nd	nd	nd	nd	nd	nd	nd	nd	nd	No aer genes
3	No712	nd	nd	nd	nd	nd	nd	nd	nd	nd	nd	nd	nd	nd	nd	nd	nd	nd	nd	nd	nd	nd	nd	nd	nd	No aer genes
3	No713*	nd	nd	nd	nd	nd	nd	nd	nd	nd	nd	nd	nd	nd	nd	nd	nd	nd	nd	nd	nd	nd	nd	nd	nd	No aer genes
3	No980	2	1.9	nd	nd	nd	nd	nd	nd	nd	nd	nd	nd	nd	nd	4	2.1	3.5	2.5	2	nd	1.9	0.9	1.7	2
3	No1020	2	1.9	nd	nd	nd	nd	nd	nd	nd	2.3	nd	nd	nd	nd	4	nd	3.5	2.8	2	nd	1.9	0.9	1	2
3	CCAP1460.6	nd	nd	nd	nd	nd	nd	nd	nd	nd	nd	nd	nd	nd	nd	nd	nd	nd	nd	nd	nd	nd	2.5	nd	nd	No aer genes
3	PCC9214*	nd	nd	nd	nd	nd	nd	nd	nd	nd	nd	nd	nd	nd	nd	nd	nd	nd	nd	nd	nd	nd	nd	nd	nd	No aer genes

## Sheet: Table S3. HPLC-MS results
Table S3: HPLC-MSn results for Aer peptides listing retention time and m/z as detected from 124 Planktothrix strains.
				Retention time [min] of Aer peptides [m/z]															Aeruginosin 89; Ishida 1999												Aeruginosid 126B; Ishida et al., 2007									Aeruginosid 126A; Ishida et al., 2007								Aeruginosin 828; Kohler et al., 2014
Lineage	Strain No	PCA Cluster	Number of Aer	821.3	821.5	717.4	735.4	707.4	731.5	821.3	845.5	845.5	717.4	689.4	771.5	717.3	715.4	713.4	717.3	855.4	805.5	717.4	741.5	741.4	795.5	771.5	689.21	687.31	805.3	639.3	691.5	655.4	663.3	795.5	829.3	765.5	775.3	829.5	805.5	715.5	869.3	691.6	765.5	663.5	673.4	835.4	725.4	829.5	609.5
1	No2A	I	2													6.8	6.8
1	No31/1	II	1						5.6
1	No32	II	3						5.6																															10.4
1	No39	II	0
1	No41	I	2													6.9	6.9
1	No63	I	2													7.1	7.1
1	No66	I	2													7.2	7.2
1	No79	II	4						5.5																						8.8									10.4
1	No250	II	6																		7.4					7.8													10.2			10.7
1	No251	II	6																		7.4					7.8													10.2			10.7
1	No252	II	7																		7.4					7.8													10.3			10.6
1	No253	I	2
1	No254	II	7																		7.4					7.8													10.2			10.7
1	No255	II	6																		7.5					7.8													10.2			10.6
1	No256	I	2													6.6	6.6
1	No257	II	6																		7.5					8													10.2			10.7
1	No259	I	6													6.6	6.6										8	8
1	No263	I	2
1	No274	I	2													6.6	6.6
1	No281	I	6													6.6	6.6										8	8.2
1	No299	I	2													6.7	6.7
1	No307	I	6													6.5	6.5										8	8
1	No320	II	4																												8.8									10.4							11.4
1	No354	II	6		4.7						5.5			6.1				6.8																															11.9
1	No394	II	1											6.1
1	No759	I	2													6.6	6.6
1	No760	II	0
1	No781	I	5			5	5						5.9									7.5										9.1
1	No787	I	2													7.1	7.1
1	No788	I	3			4.9
1	No790	I	3			5
1	No828	II	7						5.6						6.3										7.8						8.8									10.5
1	No829	I	4			5	5						5.9									7.4
1	No976	II	3							5.6										7
1	PH123	II	0
1	SAG5.81	I	2													7.1	7.1
1	CCAP1459/15	I	2													7.1	7.1
1	NIVA-CYA116	I	5																								8.1	8.1
1	NIVA-CYA126/8	II	2						5.4																															10.1
1	PCC7805	II	6																					7.9													9.6									11.1
1	PCC7811	I	2													6.5	6.5
1	NIES-596	II	9	4.6				5.3		5.5										6.9				7.8													9.7				10.4
1A	No277	II	0
1A	No364	II	6																																											11.1
1A	No365	II	2
1A	No371	II	3		4.8						5.5																																						11.9
1A	No372	II	3		4.7						5.5																																						11.9
1A	No384	II	5																																											11.1
1A	No390	II	2											6.1																																			11.9
1A	No396	II	3																																			9.8							11.1
1A	No553	II	4		4.7						5.5												7.4																										11.9
1A	No557	II	4		4.7						5.5												7.4																										12
2	No3	II	2																															9.5														11.6
2	No21-	II	0
2	No40	II	0
2	No64	II	0
2	No67	II	2																																							10.6
2	No80	II	4																							7.8								9.4					10.2									11.6
2	No82	II	3
2	No83	II	3
2	No91/1	II	3																							7.8													10.1									11.6
2	No97	II	3																							7.7													10.2									11.5
2	No108	II	2												6.4														8.1
2	No110	II	0
2	No111	II	3																							7.8								9.5														11.5
2	No139	II	0
2	No145	II	0
2	No161	II	0
2	No166	II	0
2	No169	II	0
2	No170	II	0
2	No178	II	0
2	No260	II	0
2	No403	II	2																						7.9										9.5
2	No405	II	1									5.5
2	No406	II	1									5.5
2	No496/1	II	1									5.4
2	No550	II	1									5.4
2	No551	II	1									5.5
2	No761	II	0
2	No762	II	0
2	No776	II	5																																	9.8							11
2	No778	II	5																																	9.8							11.1
2	No804	II	2																																				10.2									11.6
2	No806	II	1																															9
2	No808	II	1																															9
2	No839	II	5																																	9.7							11.1
2	CCAP1459.11A	II	0
2	CCAP1459.16	II	0
2	CCAP1459.17	II	0
2	CCAP1459.30	II	1																																													11.5
2	CCAP1459.31	II	0
2	NIVA-CYA98	II	3
2	NIVA-CYA406	II	3
2	NIVA-CYA407	II	0
2	NIVA-CYA540	II	2																											8.3			9.4
2	PCC7821	II	3
2A	No757	II	0
2A	No758	II	0
2A	No763	II	0
2A	No764	II	0
2A	No765	II	0
2A	No766	II	0
2A	No769	II	0
2A	No770	II	0
2A	No771	II	0
2A	No772	II	0
2A	No873	II	0
2A	CCAP1459.36	II	5																											8.3			9.3											11.1
2A	NIVA-CYA15	II	0
2A	NIVA-CYA34	II	4																											8.4			9.4											11.2
2A	NIVA-CYA56/3	II	0
2A	NIVA-CYA405	II	3																											8.3			9.3											11.2
3	No704	III	0
3	No707	III	0
3	No708	III	0
3	No710	III	0
3	No711	III	0
3	No712	III	0
3	No713	III	0
3	No980	I	2
3	No1020	I	1																6.9
3	PCC9214	III	0
3	CCAP1460.6	III	0
	total			1	5	4	2	1	5	2	5	5	2	3	2	15	15	1	1	2	6	2	2	2	2	10	4	4	1	4	3	1	4	5	1	3	2	1	10	5	1	7	3	3	1	3	1	7	6
			66
[truncated: 27 more columns]

## Sheet: Table S4. MSn Fragmentation
Table S4: Manual MSn fragmentation of selected Aer peptides identified from various Planktothrix strains.
									Fragmentation
Strain No	Rt [min]	[M+H]+	pos1	pos2	pos3	pos4	Su	H2O	m/z	Fragments	TOF MS ES fragments (m/z)
NIVA-CYA126/8	5.4	731.46	Hpla	Leu	Choi,Xyl	Aeap			731.46	Hpla + Leu + (Choi,Xyl) + Aeap + H+
									689.4	Hpla + Leu + (Choi,Xyl) + (Aeap -CN2H2) + H+
									599.39	Hpla + Leu + Choi + Aeap + H+
									567.4	Leu + (Choi,Xyl) + Aeap + H+
									557.37	Hpla + Leu + Choi + (Aeap -CN2H2) + H+
									454.29	(Choi,Xyl) + Aeap + H+
									412.28	(Choi,Xyl) + (Aeap -CN2H2) + H+
									322.21	Choi + Aeap + H+
									305.2	Choi + (Aeap -NH3) + H+
									287.17	(Choi -H2O) + (Aeap -NH3) + H+
									280.18	Choi + (Aeap -CN2H2) + H+
									262.12	(Choi -H2O) + (Aeap -CN2H2) + H+
									140.06	Choi + H+
	10.1	715.44	Plac	Leu	Choi,Xyl	Aeap			715.44	Plac + Leu + (Choi,Xyl) + Aeap + H+
		Aeruginosid 126A; Ishida et al., 2007							673.43	Plac + Leu + (Choi,Xyl) + (Aeap -CN2H2) + H+
									583.39	Plac + Leu + Choi + Aeap + H+
									567.38	Leu + (Choi,Xyl) + Aeap + H+
									541.36	Plac + Leu + Choi + (Aeap -CN2H2) + H+
									454.29	(Choi,Xyl) + Aeap + H+
									412.26	(Choi,Xyl) + (Aeap -CN2H2) + H+
									322.21	Choi + Aeap + H+
									305.18	Choi + (Aeap -NH3) + H+
									287.16	(Choi -H2O) + (Aeap -NH3) + H+
									280.18	Choi + (Aeap -CN2H2) + H+
									262.13	(Choi -H2O) + (Aeap -CN2H2) + H+
									140.05	Choi + H+
No31/1	5.6	731.37	Hpla	Leu/Ile	Choi,Xyl	Aeap			731.37	Hpla + Leu/Ile + (Choi,Xyl) + Aeap + H+
									689.53	Hpla + Leu/Ile + (Choi,Xyl) + (Aeap -CN2H2) + H+
									599.33	Hpla + Leu/Ile + Choi + Aeap + H+
									567.33	Leu/Ile + (Choi,Xyl) + Aeap + H+
									557.3	Hpla + Leu/Ile + Choi + (Aeap -CN2H2) + H+
									454.23	(Choi,Xyl) + Aeap + H+
									412.21	(Choi,Xyl) + (Aeap -CN2H2) + H+
									322.2	Choi + Aeap + H+
									305.16	Choi + (Aeap -NH3) + H+
									280.15	Choi + (Aeap -CN2H2) + H+
									262.21	(Choi -H2O) + (Aeap -CN2H2) + H+
									140.06	Choi + H+
NIVA-CYA116	8.1	689.24	Hpla,Cl,Su	Leu/Ile	Choi	Agm			689.24	(Hpla,Cl,Su) + Leu/Ile + Choi + Agm + H+	689.28
									609.29	(Hpla,Cl) + Leu/Ile + Choi + Agm + H+	609.32
									567.25	(Hpla,Cl) + Leu/Ile + Choi + (Agm -CN2H2) + H+
									298.19	Choi + Agm + H+	298.23
									281.16	Choi + (Agm -NH3) + H+	281.2
									210.13	(Choi -C3H5NO) + (Agm -NH3) + H+
									140	Choi + H+	140.11
	8.1	687.24	Hpla,Cl,Su	Leu/Ile	(Choi -2H)	Agm			687.24	(Hpla,Cl,Su) + Leu/Ile + (Choi -2H) + Agm + H+
									607.28	(Hpla,Cl) + Leu/Ile + (Choi -2H) + Agm + H+
									565.28	(Hpla,Cl) + Leu/Ile + (Choi -2H) + (Agm -CN2H2) + H+
									296.19	(Choi -2H) + Agm + H+
									279.16	(Choi -2H) + (Agm -NH3) + H+
									208.06	(Choi -C3H5NO, -2H) + (Agm -NH3) + H+
									137.97	(Choi -2H) + H+
	13.4	759.27	Hpla,Cl,Su	Leu/Ile	Choi,Ac	Argal			759.27	(Hpla,Cl,Su) + Leu/Ile + (Choi,Ac) + Argal + H+	759.29
									679.3	(Hpla,Cl) + Leu/Ile + (Choi,Ac) + Argal + H+	679.33
									661.29	(Hpla,Cl) + Leu/Ile + (Choi,Ac) + (Argal -H2O) + H+	661.32
									619.26	(Hpla,Cl) + Leu/Ile + (Choi -H2O) + Argal + H+	619.37
									601.28	(Hpla,Cl) + Leu/Ile + (Choi -H2O) + (Argal -H2O) + H+
									521.14
									461.09
									350.24		350.22
									333.09
									308.22	(Choi -H2O) + Argal + H+	308.12
									291.18	(Choi -H2O) + (Argal -NH3) + H+
									263.13		263.18
									248.15
									203.07
									182.04	(Choi,Ac) + H+	182.12
									122.07	(Choi -H2O) + H+	122.1
	16	731.28	Hpla,Cl,Su	Leu/Ile	Choi, Ac	Agm			731.28	(Hpla,Cl,Su) + Leu/Ile + (Choi,Ac) + Agm + H+	731.29
									651.31	(Hpla,Cl) + Leu/Ile + (Choi,Ac) + Agm + H+	651.33
									591.31	(Hpla,Cl) + Leu/Ile + (Choi -H2O) + Agm + H+
									521.14
									453.29	Leu/Ile + (Choi,Ac) + Agm + H+
									340.22	(Choi,Ac) + Agm + H+	340.24
									323.19	(Choi,Ac) + (Agm -NH3) + H+	323.21
									305.2
									263.1	(Choi -H2O) + (Agm -NH3) + H+	263.19
									252.07
									182.11	(Choi,Ac) + H+	182.12
									122.07	(Choi- H2O) + H+	122.1
	17.8	759.27	Hpla,Cl,Su	Leu/Ile	Choi,Ac	Argal			759.27	(Hpla,Cl,Su) + Leu/Ile + (Choi,Ac) + Argal + H+
									679.3	(Hpla,Cl) + Leu/Ile + (Choi,Ac) + Argal + H+
									661.29	(Hpla,Cl) + Leu/Ile + (Choi,Ac) + (Argal -H2O) + H+
									619.26	(Hpla,Cl) + Leu/Ile + (Choi -H2O) + Argal + H+
									601.28	(Hpla,Cl) + Leu/Ile + (Choi -H2O) + (Argal -H2O) + H+
									521.14
									461.09
									350.24
									333.09
									308.22	(Choi -H2O) + Argal + H+
									291.18	(Choi -H2O) + (Argal -NH3) + H+
									263.13
									248.15
									203.07
									182.04	(Choi, Ac) + H+
									122.07	(Choi -H2O) + H+
No778	9.8	765.38	Hpla	Phe	Choi,Xyl	Aeap			765.38	Hpla + Phe + (Choi,Xyl) + Aeap + H+
									659.33	(Hpla -C5H6O) + Phe + (Choi,Xyl) + Aeap + H+
									617.31	(Hpla -C5H6O) + Phe + (Choi,Xyl) + (Aeap -CN2H2) + H+
									527.29	(Hpla -C5H6O) + Phe + (Choi) + Aeap + H+
									511.26
									485.26	(Hpla -C5H6O) + Phe + (Choi) + (Aeap -CN2H2) + H+
									454.25	(Choi,Xyl) + Aeap + H+
									305.17	Choi + (Aeap -NH3) + H+
									287.17	(Choi -H2O) + (Aeap -NH3) + H+
									280.17	Choi + (Aeap -CN2H2) + H+
									262.13	(Choi -H2O) + (Aeap -CN2H2) + H+
									140.06	Choi + H+
	11.1	765.38	Hpla	Phe	Choi,Xyl	Aeap			765.38	Hpla + Phe + (Choi,Xyl) + Aeap + H+
									659.33	(Hpla -C5H6O) + Phe + (Choi,Xyl) + Aeap + H+
									617.31	(Hpla -C5H6O) + Phe + (Choi,Xyl) + (Aeap -CN2H2) + H+
									527.29	(Hpla -C5H6O) + Phe + (Choi) + Aeap + H+
									511.26
									485.26	(Hpla -C5H6O) + Phe + (Choi) + (Aeap -CN2H2) + H+
									454.25	(Choi,Xyl) + Aeap + H+
									305.17	Choi + (Aeap -NH3) + H+
									287.17	(Choi -H2O) + (Aeap -NH3) + H+
									280.17	Choi + (Aeap -CN2H2) + H+
									262.13	(Choi -H2O) + (Aeap -CN2H2) + H+
									140.06	Choi + H+
	12.4	725.44	Plac	Phe	Choi,Xyl	Agm			725.44	Plac + Phe + (Choi,Xyl) + Agm + H+
									660.33
									593.33	Plac + Phe + Choi + Agm + H+
									576.3	Plac + Phe + Choi + (Agm -NH3) + H+
									551.3	Plac + Phe + Choi + (Agm -CN2H2) + H+
									430.24	(Choi,Xyl) + Agm + H+
									365.21
									323.21
									281.17	Choi + (Agm -NH3) + H+
									263.13	(Choi -H2O) + (Agm -NH3) + H+
									210.05
									140.27	Choi + H+
	13.7	749.38	Plac	Phe	Choi,Xyl	Aeap			749.38	Plac + Phe + (Choi,Xyl) + Aeap + H+
									707.39	Plac + Phe + (Choi,Xyl) + (Aeap -CN2H2) + H+
									617.35	Plac + Phe + Choi + Aeap + H+
									575.32	Plac + Phe + Choi + (Aeap -CN2H2) + H+
									454.23	(Choi,Xyl) + Aeap + H+
									412.24	(Choi,Xyl) + (Aeap -CN2H2) + H+
									322.2	Choi + Aeap + H+
									305.19	Choi + (Aeap -NH3) + H+
									287.15	(Choi -H2O) + (Aeap -NH3) + H+
									280.2	Choi + (Aeap -CN2H2) + H+
									262.15	(Choi -H2O) + (Aeap -CN2H2) + H+
									140.03	Choi + H+
	21	617.36	Plac	Phe	Choi	Aeap			617.36	Plac + Phe + Choi + Aeap + H+
									575.32	Plac + Phe + Choi + (Aeap -CN2H2) + H+
									469.28	Phe + Choi + Aeap + H+
									427.26	Phe + Choi + (Aeap -CN2H2) + H+
									322.22	Choi + Aeap + H+
									305.17	Choi + (Aeap -NH3) + H+
									287.16	(Choi -H2O) + (Aeap -NH3) + H+
									280.17	Choi + (Aeap -CN2H2) + H+
									262.14	(Choi -H2O) + (Aeap -CN2H2) + H+
									140.1	Choi + H+
No781	5	735.23	Hpla,Cl,Su	Leu/Ile	Choi	Argal		H2O	735.23	(Hpla,Cl,Su) + Leu/Ile + Choi + Argal + H2O + H+
									655.29	(Hpla,Cl) + Leu/Ile + Choi + Argal + H2O + H+
									637.28	(Hpla,Cl) + Leu/Ile + Choi + Argal + H+
									619.25	(Hpla,Cl) + Leu/Ile + Choi + (Argal -H2O) + H+
									577.24	(Hpla,Cl) + Leu/Ile + Choi + (Argal -H2O -CN2H2) + H+
									479.14	(Hpla,Cl) + Leu/Ile + Choi + CO + H+
									266.18	Choi + (Argal -H2O -CN2H2) + H+
									140.07	Choi + H+
	5	717.23	Hplac,Cl,Su	Leu/Ile	Choi	Argal			not frag
	5.9	717.23	Hpla,Cl,Su	Leu/Ile	Choi	Argal			717.23	(Hpla,Cl,Su) + Leu/Ile + Choi + Argal + H+
									637.29	(Hpla,Cl) + Leu/Ile + Choi + Argal + H+
									619.26	(Hpla,Cl) + Leu/Ile + Choi + (Argal -H2O) + H+
									577.24	(Hpla,Cl) + Leu/Ile + Choi + (Argal -H2O -CN2H2) + H+
									479.14	(Hpla,Cl) + Leu/Ile + (Choi +CO -H) + H+
									266.14	Choi + (Argal -H2O -CN2H2) + H+
									140.06	Choi + H+
	7.5	717.23	Hpla,Cl,Su	Leu/Ile	Choi	Argal			717.23	(Hpla,Cl,Su) + Leu/Ile + Choi + Argal + H+
									699.19	(Hpla,Cl) + Leu/Ile + Choi + (Argal -H2O) + Su + H+
									637.29	(Hpla,Cl) + Leu/Ile + Choi + Argal + H+
									619.27	(Hpla,Cl) + Leu/Ile + Choi + (Argal -H2O) + H+
									577.24	(Hpla,Cl) + Leu/Ile + Choi + (Argal -H2O -CN2H2) + H+
									479.16	(Hpla,Cl) + Leu/Ile + (Choi +CO -H) + H+
									266.12	Choi + (Argal -H2O -CN2H2) + H+
									140.08	Choi + H+
	9.1	655.31	Hpla,Cl	Leu/Ile	Choi	Argal		H2O	655.31	(Hpla,Cl) + Leu/Ile + Choi + Argal + H2O + H+
									637.28	(Hpla,Cl) + Leu/Ile + Choi + Argal + H+
									619.27	(Hpla,Cl) + Leu/Ile + Choi + (Argal -H2O) + H+
									577.23	(Hpla,Cl) + Leu/Ile + Choi + (Argal -CN2H2) + H+
									479.14	(Hpla,Cl) + Leu/Ile + (Choi +CO) + H+
									266.16	Choi + (Argal -H2O -CN2H2) + H+
									140.08	Choi + H+
NIES-596	4.6	821.28	Hpla,Su	Leu/Ile,Cl	Choi,Xyl	Agm			821.28	(Hpla,Su) + (Leu/Ile,Cl) + (Choi,Xyl) + Agm + H+
									741.34	Hpla + (Leu/Ile,Cl) + (Choi,Xyl) + Agm + H+
									705.37	Hpla + (Leu/Ile -2H) + (Choi,Xyl) + Agm + H+
									569.3	(Leu/Ile +CO -2H) + (Choi,Xyl) + Agm + H+
									526.29	(Leu/Ile -N -3H) + (Choi,Xyl) + Agm + H+
									437.27	(Leu/Ile +CO -2H) + Choi + Agm + H+
									420.23	(Leu/Ile +CO -2H) + Choi + (Agm -NH3) + H+
									395.24	(Leu/Ile +CO -2H) + Choi + (Agm -CN2H2) + H+
									377.26	(Leu/Ile -N -3H) + Choi + (Agm -NH3) + H+
									307.15	(Leu/Ile +CO -2H) + (Choi +CO -H) + H+
									279.14	(Leu/Ile +CO -2H) + (Choi -H) + H+
									264.1
									140.07	Choi + H+
	5.3	707.41	Hpla	Leu/Ile	Choi,Xyl	Agm			707.41	Hpla + Leu/Ile + (Choi,Xyl) + Agm + H+
									575.31	Hpla + Leu/Ile + Choi + Agm + H+
									281.17	Choi + (Agm -NH3) + H+
									210.01	(Choi -C3H5NO) + (Agm -NH3) + H+
									182.04	(Choi -C5H9NO) + (Agm -NH3) + H+
	5.5	821.3	Hpla	Leu/Ile,Cl	Choi,Xyl,Su	Agm			821.28	Hpla + (Leu/Ile,Cl) + (Choi,Xyl,Su) + Agm + H+
									741.34	Hpla + (Leu/Ile,Cl) + (Choi,Xyl) + Agm + H+
									705.37	Hpla + (Leu/Ile -2H) + (Choi,Xyl) + Agm + H+
									569.3	(Leu/Ile +CO -2H) + (Choi,Xyl) + Agm + H+
									526.29	(Leu/Ile -N -3H) + (Choi,Xyl) + Agm + H+
									437.27	(Leu/Ile +CO -2H) + Choi + Agm + H+
									420.23	(Leu/Ile +CO -2H) + Choi + (Agm -NH3) + H+
									395.24	(Leu/Ile +CO -2H) + Choi + (Agm -CN2H2) + H+
									377.26	(Leu/Ile -N -3H) + Choi + (Agm -NH3) + H+
									307.15	(Leu/Ile +CO -2H) + (Choi +CO -H) + H+
									279.14	(Leu/Ile +CO -2H) + (Choi -H) + H+
									264.1
									140.07	Choi + H+
	6.9	855.25	Hpla,Cl	Leu/Ile,Cl	Choi,Xyl	Agm	Su		855.25	(Hpla,Cl) + (Leu/Ile,Cl) + (Choi,Xyl) + Agm + Su + H+
									775.31	(Hpla,Cl) + (Leu/Ile,Cl) + (Choi,Xyl) + Agm + H+
									739.33	(Hpla,Cl) + (Leu/Ile -2H) + (Choi,Xyl) + Agm + H+
									569.31	(Leu/Ile +CO -2H) + (Choi,Xyl) + Agm + H+
									526.32	(Leu/Ile -N -3H) + (Choi,Xyl) + Agm + H+
									437.3	(Leu/Ile +CO -2H) + Choi + Agm + H+
									420.23	(Leu/Ile +CO -2H) + Choi + (Agm -NH3) + H+
									377.23	(Leu/Ile -N -3H) + Choi + (Agm -NH3) + H+
									307.13	(Leu/Ile +CO -2H) + (Choi +CO -H) + H+
									282.09
									263.07	(Choi -H2O) + (Agm -NH3) + H+
									210.12	(Choi -C3H5NO) + (Agm -NH3) + H+
									140.1	Choi + H+
	7.8	741.38	Hpla,Cl	Leu/Ile	Choi,Xyl	Agm			741.38	(Hpla,Cl) + Leu/Ile + (Choi,Xyl) + Agm + H+
									676.29
									609.28	(Hpla,Cl) + Leu/Ile + Choi + Agm + H+
									567.3
									430.24	(Choi,Xyl) + Agm + H+
									365.21
									323.25
									298.2	Choi + Agm + H+
									281.18	Choi + (Agm -NH3) + H+
									210.08	(Choi -C3H5NO) + (Agm -NH3) + H+
									140.06	Choi + H+
	9.7	775.36	Hpla,Cl	Leu/Ile,Cl	Choi,Xyl	Agm			775.36	(Hpla,Cl) + Leu/Ile,Cl + (Choi,Xyl) + Agm + H+
									739.33	(Hpla,Cl) + (Leu/Ile -H) + (Choi,Xyl) + Agm + H+
									569.3	(Leu/Ile +CO -2H) + (Choi,Xyl) + Agm + H+
									526.29	(Leu/Ile -N -3H) + (Choi,Xyl) + Agm + H+
									437.25	(Leu/Ile +CO -2H) + Choi + Agm + H+
									420.25	(Leu/Ile +CO -2H) + Choi + (Agm -NH3) + H+
									307.13	(Leu/Ile +CO -2H) + (Choi +CO -H) + H+
									279.14	(Leu/Ile +CO -2H) + (Choi -H) + H+
									210.06	(Choi -C3H5NO) + (Agm -NH3) + H+
									140.06	Choi + H+
	10.4	869.27	Hpla,Cl,Me,Su	Leu/Ile,Cl	Choi,Xyl	Agm			869.27	(Hpla,Cl,Me,Su) + (Leu/Ile,Cl) + (Choi,Xyl) + Agm + H+
									789.34	(Hpla,Cl,Me) + (Leu/Ile,Cl) + (Choi,Xyl) + Agm + H+
									753.35	(Hpla,Cl,Me) + (Leu/Ile -2H) + (Choi,Xyl) + Agm + H+
									657.29	(Hpla,Cl,Me) + (Leu/Ile,Cl) + Choi + Agm + H+
									569.31	(Leu/Ile +CO -2H) + (Choi,Xyl) + Agm + H+
									526.3	(Leu/Ile -N -3H) + (Choi,Xyl) + Agm + H+
									437.29	(Leu/Ile +CO -2H) + Choi + Agm + H+
									420.21	(Leu/Ile +CO -2H) + Choi + (Agm -NH3) + H+
									402.22	(Leu/Ile +CO -2H) + (Choi -H2O) + (Agm -NH3) + H+
									377.23	(Leu/Ile -N -3H) + Choi + (Agm -NH3) + H+
									307.15	(Leu/Ile +CO -2H) + (Choi +CO -H) + H+
									281.15	Choi + (Agm -NH3) + H+
									210.07	(Choi -C3H5NO) + (Agm -NH3) + H+
									140.06	Choi + H+
	13.5	869.27	Hpla,Cl,Me	Leu/Ile,Cl	Choi,Xyl,Su	Agm			869.27	(Hpla,Cl,Me) + Leu/Ile,Cl + (Choi,Xyl,Su) + Agm + H+
									789.35	(Hpla,Cl,Me) + Leu/Ile,Cl + (Choi,Xyl) + Agm + H+
									753.35	(Hpla,Cl,Me) + (Leu/Ile -H) + (Choi,Xyl) + Agm + H+
									569.31	(Leu/Ile +CO -2H) + (Choi,Xyl) + Agm + H+
									534.29
									420.22	(Leu/Ile +CO -2H) + Choi + (Agm -NH3) + H+
									395.19	(Leu/Ile +CO -2H) + Choi + (Agm -CN2H2) + H+
									307.14	(Leu/Ile +CO -2H) + (Choi +CO -H) + H+
									281.15	Choi + (Agm -NH3) + H+
									279.14	(Leu/Ile +CO -2H) + (Choi -H) + H+
									210.13	(Choi -C3H5NO) + (Agm -NH3) + H+
									140.11	Choi + H+
	17.4	789.29				not frag
PCC7805	7.9	741.41	Hpla,Cl	Leu/Ile	Choi,Xyl	Agm			741.41	(Hpla,Cl) + Leu/Ile + (Choi,Xyl)+ Agm + H+
									676.35
									609.35	(Hpla,Cl) + Leu/Ile + Choi+ Agm + H+
									592.32	(Hpla,Cl) + Leu/Ile + Choi+ (Agm -NH3) + H+
									567.31	(Hpla,Cl) + Leu/Ile + Choi+ (Agm -CN2H2) + H+
									543.4	Leu/Ile + (Choi,Xyl)+ Agm + H+
									430.28	(Choi,Xyl) + Agm + H+
									413.25	(Choi,Xyl) + (Agm -NH3) + H+
									365.24
									323.2
									281.17	Choi + (Agm -NH3) + H+
									263.16	(Choi -H2O) + (Agm -NH3) + H+
									256.17	Choi + (Agm -CH2N2) + H+
									210.04	(Choi -C3H5NO) + (Agm -NH3) + H+
									140.04	Choi + H+
	9.6	775.38	Hpla,Cl	Leu/Ile,Cl	Choi,Xyl	Agm			775.38	(Hpla,Cl) + (Leu/Ile,Cl) + (Choi,Xyl) + Agm + H+
									739.39	(Hpla,Cl) + (Leu/Ile -2H) + (Choi,Xyl) + Agm + H+
									569.36	(Leu/Ile +CO -2H) + (Choi,Xyl) + Agm + H+
									526.35	(Leu/Ile -N -3H) + (Choi,Xyl) + Agm + H+
									437.28	(Leu/Ile +CO) + Choi + Agm + H+
									420.28	(Leu/Ile +CO -2H) + Choi + (Agm -NH3) + H+
									395.34	(Leu/Ile +CO -2H) + Choi + (Agm -CN2H2) + H+
									307.1	(Leu/Ile +CO -2H) + (Choi +CO -H) + H+
									289.09
									281.18	Choi + (Agm -NH3) + H+
									279.19	(Leu/Ile +CO -2H) + (Choi -H) + H+
									261.17
									140.01	Choi + H+
	11.1	835.42	Hpla,Cl,Me	Leu/Ile	Choi,Xyl,Su	Agm			835.42	(Hpla,Cl,Me) + Leu/Ile + (Choi,Xyl,Su) + Agm + H+
									755.43	(Hpla,Cl,Me) + Leu/Ile + (Choi,Xyl) + Agm + H+
									690.36
									623.37	(Hpla,Cl,Me) + Leu/Ile + Choi + Agm + H+
									606.34	(Hpla,Cl,Me) + Leu/Ile + Choi + (Agm -NH3) + H+
									581.34	(Hpla,Cl,Me) + Leu/Ile + Choi + (Agm -CN2H2) + H+
									543.39	Leu/Ile + (Choi,Xyl)+ Agm + H+
									430.29	(Choi,Xyl) + Agm + H+
									413.27	Choi + (Agm -NH3) + Xyl + H+
									365.24
									323.22
									281.18	Choi + (Agm -NH3) + H+
									263.16	(Choi -H2O) + (Agm -NH3) + H+
									256.17	Choi + (Agm-CH2N2) + H+
									210.05	(Choi -C3H5NO) + (Agm -NH3) + H+
									140.06	Choi + H+
	13.6	869.37	Hpla,Cl,Me	Leu/Ile,Cl	Choi,Xyl,Su	Agm			869.37	(Hpla,Cl,Me) + (Leu/Ile,Cl) + (Choi,Xyl,Su) + Agm + H+
									789.39	(Hpla,Cl,Me) + (Leu/Ile,Cl) + (Choi,Xyl) + Agm + H+
									753.41	(Hpla,Cl,Me) + (Leu/Ile -2H) + (Choi,Xyl) + Agm + H+
									569.36	(Leu/Ile +CO -2H) + (Choi,Xyl) + Agm + H+
									526.34	(Leu/Ile -N -3H) + (Choi,Xyl) + Agm + H+
									437.3	(Leu/Ile +CO -2H) + Choi + Agm + H+
									420.27	(Leu/Ile +CO -2H) + Choi + (Agm -NH3) + H+
									395	(Leu/Ile +CO -2H) + Choi + (Agm -CN2H2) + H+
									377.27	(Leu/Ile -N -3H) + Choi + (Agm -NH3) + H+
									307.16	(Leu/Ile +CO -2H) + (Choi +CO -H) + H+
									281.17
									279.15	(Leu/Ile +CO -2H) + (Choi -H) + H+
									261.11
									210.07	(Choi -C3H5NO) + (Agm -NH3) + H+
									140	Choi + H+
	14.4	755.45	Hpla,Cl,Me	Leu/Ile	Choi,Xyl	Agm			755.45	(Hpla,Cl,Me) + Leu/Ile + (Choi,Xyl) + Agm + H+
									690.36
									623.36	(Hpla,Cl,Me) + Leu/Ile + Choi + Agm + H+
									606.35	(Hpla,Cl,Me) + Leu/Ile + Choi + (Agm -NH3) + H+
									581.35	(Hpla,Cl,Me) + Leu/Ile + Choi + (Agm -CN2H2) + H+
									543.4	Leu/Ile + (Choi,Xyl)+ Agm + H+
									430.28	(Choi,Xyl) + Agm + H+
									413.25	Choi + (Agm -NH3) + Xyl + H+
									365.26
									323.22
									281.15	Choi + (Agm -NH3) + H+
									263.12	(Choi -H2O) + (Agm -NH3) + H+
									210.09	(Choi -C3H5NO) + (Agm -NH3) + H+
									140.04	Choi + H+
	17.3	789.39	Hpla,Cl,Me	Leu/Ile,Cl	Choi,Xyl	Agm			789.39	(Hpla,Cl,Me) + (Leu/Ile,Cl) + (Choi,Xyl) + Agm + H+
									753.42	(Hpla,Cl,Me) + (Leu/Ile -2H) + (Choi,Xyl) + Agm + H+
									621.33	(Hpla,Cl,Me) + (Leu/Ile -2H) + Choi + Agm + H+
									604.33	(Hpla,Cl,Me) + (Leu/Ile -2H) + Choi + (Agm -NH3) + H+
									569.35	(Leu/Ile +CO -2H) + (Choi,Xyl) + Agm + H+
									526.35	(Leu/Ile -N -3H) + (Choi,Xyl) + Agm + H+
									437.31	(Leu/Ile +CO) + Choi + Agm + H+
									420.29	(Leu/Ile +CO -2H) + Choi + (Agm -NH3) + H+
									395.28	(Leu/Ile +CO -2H) + Choi + (Agm -CN2H2) + H+
									307.16	(Leu/Ile +CO -2H) + (Choi +CO -H) + H+
									281.16	Choi + (Agm -NH3) + H+
									279	(Leu/Ile +CO -2H) + (Choi -H) + H+
									139.94	Choi + H+
No67	10.6	691.44	Plac	Leu/Ile	Choi,Xyl	Agm			691.44	Plac + Leu/Ile + (Choi,Xyl) + Agm + H+
									626.36
									559.37	Plac + Leu/Ile + Choi + Agm + H+
									430.28	(Choi,Xyl) + Agm + H+
									413.25	(Choi,Xyl) + (Agm -NH3) + H+
									411.28	Leu/Ile + Choi + Agm + H+
									365.23
									342.07
									323.21
									289.2
									281.17	Choi + (Agm -NH3) + H+
									210.08	(Choi -C3H5NO) + (Agm -NH3) + H+
									140.08	Choi+ H+
	13.6	725.39	Plac	Leu/Ile,Cl	Choi,Xyl	Agm			725.39	Plac + (Leu/Ile,Cl) + (Choi,Xyl) + Agm + H+
									689.4	Plac + (Leu/Ile -2H) + (Choi,Xyl) + Agm + H+
									569.34	(Leu/Ile +CO -2H) + (Choi,Xyl) + Agm + H+
									540.34
									526.33	(Leu/Ile -N -3H) + (Choi,Xyl) + Agm + H+
									430.26	(Choi,Xyl) + Agm + H+
									420.25	(Leu/Ile +CO -2H) + Choi + (Agm -NH3) + H+
									402.25	(Leu/Ile +CO -2H) + (Choi -H2O) + (Agm -NH3) + H+
									395.27	(Leu/Ile +CO -2H) + Choi + (Agm -CN2H2) + H+
									392.26	Leu/Ile + Choi + (Agm -NH3) + H+
									377.24	(Leu/Ile -N -3H) + Choi + (Agm -NH3) + H+
									307.16	(Leu/Ile +CO -2H) + (Choi +CO -H) + H+
									281.18
									279.15	(Leu/Ile +CO -2H) + (Choi -H) + H+
									264.12
									253.12
									210.08	(Choi -C3H5NO) + (Agm -NH3) + H+
									140.06	Choi + H+
No80	7.8	771.36	Plac	Leu	Choi,Xyl,Su	Agm			771.36	Plac + Leu + (Choi,Xyl,Su) + Agm + H+
									691.42	Plac + Leu + (Choi,Xyl) + Agm + H+
									626.38
									559.37	Plac + Leu + Choi + Agm + H+
									430.26	(Choi,Xyl) + Agm + H+
									413.25	(Choi,Xyl) + (Agm -NH3) + H+
									365.21
									323.19
									298.2	Choi + Agm + H+
									281.18	Choi + (Agm -NH3) + H+
									210.07	(Choi -C3H5NO) + (Agm -NH3) + H+
									140.1	Choi + H+
	9.4	795.36	Plac	Leu	Choi,Xyl,Su	Aeap			795.36	Plac + Leu + (Choi,Xyl,Su) + Aeap + H+
									715.41	Plac + Leu + (Choi,Xyl) + Aeap + H+
									673.41	Plac + Leu + Choi + (Aeap,Xyl -CN2H2) + H+
									583.38	Plac + Leu + Choi + Aeap + H+
									541.35	Plac + Leu + Choi + (Aeap -CN2H2) + H+
									454.26	(Choi,Xyl) + Aeap + H+
									412.23	(Choi,Xyl) + (Aeap -CN2H2) + H+
									322.22	Choi + Aeap + H+
									305.18	Choi + (Aeap -NH3) + H+
									287.19	(Choi -H2O) + (Aeap -NH3) + H+
									280.18	Choi + (Aeap -CN2H2) + H+
									262.15	(Choi -H2O) + (Aeap -CN2H2) + H+
									245
									140.11	Choi + H+
	10.2	805.28	Plac	Leu, Cl	Choi,Xyl,Su	Agm			805.28	Plac + (Leu+Cl) + (Choi,Xyl,Su) + Agm + H+
									725.39	Plac + (Leu+Cl) + (Choi,Xyl) + Agm + H+
									689.41	Plac + Leu + (Choi,Xyl) + Agm + H+
									569.33	(Leu +CO -2H) + (Choi,Xyl) + Agm + H+
									526.33	(Leu -N -3H) + (Choi,Xyl) + Agm + H+
									437.28	(Leu +CO -2H) + Choi + Agm + H+
									420.25	(Leu +CO -2H) + Choi + (Agm -NH3) + H+
									402.2	(Leu +CO -2H) + (Choi -H2O) + (Agm -NH3) + H+
									392.19	Leu + Choi + (Agm -NH3) + H+
									377.28	(Leu -N -3H) + Choi + (Agm -NH3) + H+
									307.17	(Leu +CO -2H) + (Choi +CO -H) + H+
									279.09	(Leu +CO -2H) + (Choi -H) + H+
									140.07	Choi + H+
	11.6	829.32	Plac	Leu, Cl	Choi,Xyl,Su	Aeap			829.32	Plac + (Leu,Cl) + (Choi,Xyl,Su) + Aeap + H+
		Aeruginosin 828; Kohler et al., 2014							749.39	Plac + (Leu,Cl) + (Choi,Xyl) + Aeap + H+
									713.41	Plac + (Leu -2H) + (Choi,Xyl) + Aeap + H+
									593.34	(Leu +CO -2H) + (Choi,Xyl) + Aeap + H+
									550.33	(Leu -N -3H) + (Choi,Xyl) + Aeap + H+
									508.3	(Leu -N -3H) + (Choi,Xyl) + (Aeap -CN2H2) + H+
									461.29	(Leu +CO -2H) + Choi + Aeap + H+
									419.22	(Leu +CO -2H) + Choi + (Aeap -CN2H2) + H+
									376.25
									280.18	Choi + (Aeap -CN2H2) + H+
									236.12
									140.03	Choi + H+
No396	9.8	829.4	Plac	Phe	Choi,Xyl, Su	Aeap			829.4	Plac + Phe + (Choi,Xyl,Su) + Aeap + H+
									749.39	Plac + Phe + (Choi,Xyl) + Aeap + H+
									707.38	Plac + Phe + (Choi,Xyl) + (Aeap -CN2H2) + H+
									617.36	Plac + Phe + Choi + Aeap + H+
									601.34	Phe + (Choi,Xyl) + Aeap + H+
									575.35	Plac + Phe + Choi + (Aeap -CN2H2) + H+
									469.3	Phe + Choi + Aeap + H+
									454.29	(Choi,Xyl) + Aeap + H+
									427.19	Phe + Choi + (Aeap -CN2H2) + H+
									322.22	Choi + Aeap + H+
									305.18	Choi + (Aeap -NH3) + H+
									287.17	(Choi -H2O) + (Aeap -NH3) +H
									280.18	Choi + (Aeap -CN2H2) + H+
									140.02	Choi + H+
	11.1	673.3	Plac	Phe	Choi	Agm	Su		673.3	Plac + Phe + Choi + Agm + Su + H+
									593.36	Plac + Phe + Choi + Agm + H+
									576.34	Plac + Phe + Choi + (Agm -NH3) + H+
									551.34	Plac + Phe + Choi + (Agm -CN2H2) + H+
									445.31	Phe + Choi + Agm + H+
									281.16	Choi + (Agm -NH3) + H+
									210.07	(Choi -C3H5NO) + (Agm -NH3) + H+
									140.08	Choi + H+
	12.2	697.32	Plac	Phe	Choi	Aeap	Su		697.32	Plac + Phe + Choi + Aeap + Su + H+
									617.36	Plac + Phe + Choi + Aeap + H+
									575.34	Plac + Phe + Choi + (Aeap -CN2H2) + H+
									497.27
									469.3	Phe + Choi + Aeap + H+
									427.28	Phe + Choi + (Aeap -CN2H2) + H+
									322.23	Choi + Aeap + H+
									305.18	Choi + (Aeap -NH3) + H+
									287.18	(Choi -H2O) + (Aeap -NH3) +H
									280.18	Choi + (Aeap -CN2H2) + H+
									262.15	(Choi -H2O) + (Aeap -CN2H2) +H
									140.08	Choi + H+
No354	4.7	821.27	Hpla	Phe	Choi,Xyl,Su	Agm			821.27	Hpla + Phe + (Choi,Xyl,Su) + Agm + H+
									741.34	Hpla + Phe + (Choi,Xyl) + Agm + H+
									676.25
									609.31	Hpla + Phe + Choi + Agm + H+
									592.28	Hpla + Phe + Choi + (Agm -NH3) + H+
									567.34	Hpla + Phe + Choi + (Agm -CN2H2) + H+
									430.24	(Choi,Xyl) + Agm + H+
									413.25	(Choi,Xyl) + (Agm -NH3) + H+
									365.2
									358.15
									323.27
									298.29	Choi + Agm + H+
									281.15	Choi + (Agm -CN2H2) + H+
									263.19	(Choi -H2O) + (Agm -NH3) + H+
									210.06	(Choi -C3H5NO) + (Agm -NH3) + H+
									182.11	(Choi -C5H9NO) + (Agm -NH3) + H+
									140.21	Choi + H+
	5.5	845.26	Hpla	Phe	Choi,Xyl,Su	Aeap			845.26	Hpla + Phe + (Choi,Xyl,Su) + Aeap + H+
									765.34	Hpla + Phe + (Choi,Xyl+H) + Aeap + H+
									723.33	Hpla + Phe + (Choi,Xyl+H) + (Aeap -CN2H2) + H+
									633.32	Hpla + Phe + Choi + Aeap + H+
									591.25	Hpla + Phe + Choi + (Aeap -CN2H2) + H+
									469.26	Phe + Choi + Aeap + H+
									454.24	(Choi,Xyl) + Aeap + H+
									322.19	Choi + Aeap + H+
									305.16	Choi + (Aeap -NH3) + H+
									287.14	(Choi -H2O) + (Aeap -NH3) + H+
									280.17	Choi + (Aeap -CN2H2) + H+
									262.14	(Choi -H2O) + (Aeap -CN2H2) + H+
									140.04	Choi + H+
	6.1	689.26	Hpla	Phe	Choi	Agm	Su		689.26	Hpla + Phe + Choi + Agm + Su + H+
									609.31	Hpla + Phe + Choi + Agm + H+
									592.23	Hpla + Phe + Choi + (Agm -NH3) + H+
									567.24	Hpla + Phe + Choi + (Agm -CN2H2) + H+
									445.22	Phe + Choi + Agm + H+
									428.21
									281.13	Choi + (Agm -NH3) + H+
									210.07	(Choi -C3H5NO) + (Agm -NH3) + H+
									182.07	(Choi -C5H9NO) + (Agm -NH3) + H+
									140.08	Choi + H+
	6.8	713.25	Hpla	Phe	Choi	Aeap	Su		713.25	Hpla + Phe + Choi + Aeap + Su + H+
									633.31	Hpla + Phe + Choi + Aeap + H+
									591.29	Hpla + Phe + Choi + (Aeap -CN2H2) + H+
									469.25	Phe + Choi + Aeap + H+
									427.24	Phe + Choi + (Aeap -CN2H2) + H+
									322.2	Choi + Aeap + H+
									305.16	Choi + (Aeap -NH3) + H+
									287.13	(Choi -H2O) + (Aeap -NH3) + H+
									280.17	Choi + (Aeap -CN2H2) + H+
									262.13	(Choi -H2O) + (Aeap -CN2H2) + H+
									140.1	Choi + H+
	11.9	609.32	Hpla	Phe	Choi	Agm			609.32	Hpla + Phe + Choi + Agm + H+
									592.3	Hpla + Phe + Choi + (Agm -NH3) + H+
									567.3	Hpla + Phe + Choi + (Agm -CN2H2) + H+
									549.27
									494.99
									445.25	Phe + Choi + Agm + H+
									298.19	Choi + Agm + H+
									281.14	Choi + (Agm -NH3) + H+
									210.07	(Choi -C3H5NO) + (Agm -NH3) + H+
									140.06	Choi + H+
	12.5	633.31	Hpla	Phe	Choi	Aeap			633.31	Hpla + Phe + Choi + Aeap + H+
									591.28	Hpla + Phe + Choi + (Aeap -CN2H2) + H+
									469.26	Phe + Choi + Aeap + H+
									322.2	Choi + Aeap + H+
									305.16	Choi + (Aeap -NH3) + H+
									287.19	(Choi -H2O) + (Aeap -NH3) + H+
									280.16	Choi + (Aeap -CN2H2) + H+
									140.05	Choi + H+
No108	6.4	771.37	Plac	Leu/Ile	Choi,Xyl,Su	Agm			771.37	Plac + Leu/Ile + (Choi,Xyl,Su) + Agm + H+
									691.42	Plac + Leu/Ile + (Choi,Xyl) + Agm + H+
									559.37	Plac + Leu/Ile + Choi + Agm + H+
									430.28	(Choi,Xyl) + Agm + H+
									413.22	(Choi,Xyl) + (Agm -NH3) + H+
									394.37	Leu/Ile + Choi + (Agm -NH3) + H+
									365.21
									342.1
									323.22
									281.19	Choi + (Agm -NH3) + H+
									210.09	(Choi -C3H5NO) + (Agm -NH3) + H+
									140.07	Choi + H+
	8.1	805.32	Plac	Leu/Ile,Cl	Choi,Xyl,Su	Agm			805.32	Plac + (Leu/Ile,Cl) + (Choi,Xyl,Su) + Agm + H+
									725.39	Plac + (Leu/Ile,Cl) + (Choi,Xyl) + Agm + H+
									689.41	Plac + (Leu/Ile -2H) + (Choi,Xyl) + Agm + H+
									569.35	(Leu/Ile +CO -2H) + (Choi,Xyl) + Agm + H+
									437.33	(Leu/Ile +CO -2H) + Choi + Agm + H+
									420.26	(Leu/Ile +CO -2H) + Choi + (Agm -NH3) + H+
									377.22	(Leu/Ile -N -3H) + Choi + (Agm -NH3) + H+
									263.07	(Choi -H2O) + (Agm -NH3) + H+
									235.24
									140.18	Choi + H+
No405	5.5	845.32	Hpla	Leu/Ile,Cl	Choi,Xyl,Su	Aeap			845.32	Hpla + (Leu/Ile,Cl) + (Choi,Xyl,Su) + Aeap + H+
									765.38	Hpla + (Leu/Ile,Cl) + (Choi,Xyl) + Aeap + H+
									729.41	Hpla + (Leu/Ile -2H) + (Choi,Xyl) + Aeap + H+
									593.34	(Leu/Ile +CO -2H) + (Choi,Xyl) + Aeap + H+
									550.34	(Leu/Ile -N -3H) + (Choi,Xyl) + Aeap + H+
									508.31	(Leu/Ile -N -3H) + (Choi,Xyl) + (Aeap -CN2H2) + H+
									461.29	(Leu/Ile +CO -2H) + Choi + Aeap + H+
									419.26	(Leu/Ile +CO -2H) + Choi + (Aeap -CN2H2) + H+
									376.26
									307.15	(Leu/Ile +CO -2H) + (Choi +CO -H) + H+
									290.15
									287.14	(Choi -H2O) + (Aeap -NH3) + H+
									279.13	(Leu/Ile +CO -2H) + (Choi -H) + H+
									264.14
									236.11
									140.1	Choi + H+
No806	9	795.3	Plac	Leu/Ile	Choi,Xyl,Su	Aeap			795.3	Plac + Leu/Ile + (Choi,Xyl,Su) + Aeap + H+
									715.39	Plac + Leu/Ile + (Choi,Xyl) + Aeap + H+
									673.38	Plac + Leu/Ile + (Choi,Xyl) + (Aeap -CN2H2) + H+
									583.35	Plac + Leu/Ile + Choi + Aeap + H+
									541.34	Plac + Leu/Ile + Choi + (Aeap -CN2H2) + H+
									454.25	(Choi,Xyl) + Aeap + H+
									435.3	Leu/Ile + Choi + Aeap + H+
									412.23	(Choi,Xyl) + (Aeap -CN2H2) + H+
									393.29	Leu/Ile + Choi + (Aeap -CN2H2) + H+
									322.22	Choi + Aeap + H+
									305.17	Choi + (Aeap -NH3) + H+
									287.15	(Choi -H2O) + (Aeap -NH3) + H+
									280.18	Choi + (Aeap -CN2H2) + H+
									262.13	(Choi -H2O) + (Aeap -CN2H2) + H+
									140.04	Choi + H+
CCAP1459.30	11.5	829.3	Plac	Leu,Cl	Choi,Xyl,Su	Aeap			829.3	Plac + (Leu,Cl) + (Choi,Xyl,Su) + Aeap + H+
		Aeruginosin 828; Kohler et al., 2014							749.37	Plac + (Leu,Cl) + (Choi,Xyl) + Aeap + H+
									713.39	Plac + (Leu -2H) + (Choi,Xyl) + Aeap + H+
									593.32	(Leu +CO -2H) + (Choi,Xyl) + Aeap + H+
									550.31	(Leu -N -3H) + (Choi,Xyl) + Aeap + H+
									508.3	(Leu -N -3H) + (Choi,Xyl) + (Aeap -CN2H2) + H+
									461.26	(Leu +CO -2H) + Choi + Aeap + H+
									419.25	(Leu +CO -2H) + Choi + (Aeap -CN2H2) + H+
									401.23	(Leu -N -3H) + Choi + (Aeap -NH3) + H+
									376.22	(Leu -N -3H) + Choi + (Aeap -CN2H2) + H+
									307.13	(Leu +CO -2H) + (Choi +CO -H) + H+
									290.18
									279.14	(Leu +CO -2H) + (Choi -H) + H+
									140.07	Choi + H+
CCAP1459.36	8.3	639.31	Plac,Su	Leu/Ile	Choi	Agm			639.31	(Plac,Su) + Leu/Ile + Choi + Agm + H+
									559.36	Plac + Leu/Ile + Choi + Agm + H+
									517.32	Plac + Leu/Ile + Choi + (Agm -CN2H2)+ H+
									411.28	Leu/Ile + Choi + Agm + H+
									298.2	Choi + Agm + H+
									281.16	Choi + (Agm -NH3) + H+
									210.07	(Choi -C3H5NO) + (Agm -NH3) + H+
									140.07	Choi + H+
	9.3	663.31	Plac,Su	Leu/Ile	Choi	Aeap			663.31	(Plac,Su) + Leu/Ile + Choi + Aeap + H+
									583.36	Plac + Leu/Ile + Choi + Aeap + H+
									541.33	Plac + Leu/Ile + Choi + (Aeap -CN2H2) + H+
									463.28	(Leu/Ile +CO) + Choi + Aeap + H+
									435.3	Leu/Ile + Choi + Aeap + H+
									393.27	Leu/Ile + Choi + (Aeap -CN2H2) + H+
									322.21	Choi + Aeap + H+
									305.18	Choi + (Aeap -NH3) + H+
									287.14	(Choi -H2O) + (Aeap -NH3) + H+
									280.17	Choi + (Aeap -CN2H2) + H+
									262.15	(Choi -H2O) + (Aeap -CN2H2) + H+
									140.06	Choi + H+
	11.1	663.31	Plac,Su	Leu/Ile	Choi	Aeap			663.31	(Plac,Su) + Leu/Ile + Choi + Aeap + H+
									583.36	Plac + Leu/Ile + Choi + Aeap + H+
									541.33	Plac + Leu/Ile + Choi + (Aeap -CN2H2) + H+
									463.3	(Leu/Ile +CO) + Choi + Aeap + H+
									435.31	Leu/Ile + Choi + Aeap + H+
									322.19	Choi + Aeap + H+
									305.18	Choi + (Aeap -NH3) + H+
									287.14	(Choi -H2O) + (Aeap -NH3) + H+
									280.18	Choi + (Aeap -CN2H2) + H+
									262.15	(Choi -H2O) + (Aeap -CN2H2) + H+
									140.09	Choi + H+
	16.1	583.37	Plac	Leu/Ile	Choi	Aeap			583.37	Plac + Leu/Ile + Choi + Aeap + H+
									541.34	Plac + Leu/Ile + Choi + (Aeap -CN2H2) + H+
									435.28	Leu/Ile + Choi + Aeap + H+
									322.21	Choi + Aeap + H+
									305.17	Choi + (Aeap -NH3) + H+
									287.16	(Choi -H2O) + (Aeap -NH3) + H+
									280.18	Choi + (Aeap -CN2H2) + H+
									262.13	(Choi -H2O) + (Aeap -CN2H2) + H+
									244.15
									196.9
									140.05	Choi + H+
	19.5	583.4	Plac	Leu/Ile	Choi	Aeap			583.37	Plac + Leu/Ile + Choi + Aeap + H+
									541.34	Plac + Leu/Ile + Choi + (Aeap -CN2H2) + H+
									435.28	Leu/Ile + Choi + Aeap + H+
									322.21	Choi + Aeap + H+
									305.17	Choi + (Aeap -NH3) + H+
									287.16	(Choi -H2O) + (Aeap -NH3) + H+
									280.18	Choi + (Aeap -CN2H2) + H+
									262.13	(Choi -H2O) + (Aeap -CN2H2) + H+
									244.15
									196.9
									140.05	Choi + H+
No980	14.6	759.3	Hpla,Cl,Su	Leu/Ile	Choi,Ac	Argal			759.3	(Hpla,Cl,Su) + Leu/Ile + (Choi,Ac) + Argal + H+
									679.3	(Hpla,Cl) + Leu/Ile + (Choi,Ac) + Argal + H+
									661.3	(Hpla,Cl) + Leu/Ile + (Choi,Ac) + (Argal -H2O) + H+
									619.26	(Hpla,Cl) + Leu/Ile + (Choi,Ac) + (Argal -H2O -CN2H2) + H+
									619.26	(Hpla,Cl) + Leu/Ile + (Choi -H2O) + Argal + H+
									601.33	(Hpla,Cl) + Leu/Ile + (Choi -H2O) + (Argal -H2O) + H+
									560
									521.18	(Hpla,Cl) + Leu/Ile + (Choi,Ac +CO -H) + H+
									412
									308.16	(Choi -H2O) + Argal + H+
									263.1
									182.04	(Choi,Ac) + H+
									122.09	(Choi -H2O) + H+
	15.5	793.23	Hpla,Cl,Cl,Su	Leu/Ile	Choi,Ac	Argal			793.23	(Hpla,2Cl,Su) + Leu/Ile + (Choi,Ac) + Argal + H+
									713.3	(Hpla,2Cl) + Leu/Ile + (Choi,Ac) + Argal + H+
									695.3	(Hpla,2Cl) + Leu/Ile + (Choi,Ac) + (Argal -H2O) + H+
									653.24	(Hpla,2Cl) + Leu/Ile + (Choi,Ac) + (Argal -H2O -CN2H2) + H+
									653	(Hpla,2Cl) + Leu/Ile + (Choi -H2O) + Argal + H+
									555.14	(Hpla,2Cl) + Leu/Ile + (Choi,Ac +CO -H) H+
									491.28	(Leu/Ile +CO) + (Choi,Ac) + (Argal -H2O) + H+
									463.28	Leu/Ile + (Choi,Ac) + (Argal -H2O) + H+
									308.12	(Choi -H2O) + Argal + H+
									263.14
									203
									182	(Choi,Ac) + H+
									122	(Choi -H2O) + H+
No66	7.2	717.29	Hpla,Cl,Su	Leu/Ile	Choi	Argal			717.29	(Hpla,Cl,Su) + Leu/Ile + Choi + Argal + H+	717.27
									637.34	(Hpla,Cl) + Leu/Ile + Choi + Argal + H+	637.31
									619.32	(Hpla,Cl) + Leu/Ile + Choi + Argal - H2O + H+	619.31
									577.3	(Hpla,Cl) + Leu/Ile + Choi + (Argal -CN2H2) -H2O + H+	557.28
									559.3	(Hpla,Cl) + Leu/Ile + (Choi -H2O) + (Argal -H2O -CN2H2) + H+
									479.2	(Hpla,Cl) + Leu/Ile + (Choi +CO -H) + H+	479.2
									286.16
									266.15	Choi + (Argal -CN2H2) -H2O + H+	266.19
									221.09		221.17
									140	Choi + H+	140.11
	7.2	715.29	Hpla,Cl,Su	Leu/Ile	(Choi -2H)	Argal			715.29	(Hpla,Cl,Su) + Leu/Ile + Choi + Argal - 2H + H+
									635.33	(Hpla,Cl) + Leu/Ile + Choi + Argal - 2H + H+
									617.33	(Hpla,Cl) + Leu/Ile + Choi + Argal - H2O - 2H + H+
									575.28	(Hpla,Cl) + Leu/Ile + Choi + (Argal -CN2H2) -H2O - 2H + H+
									557.27	(Hpla,Cl) + Leu/Ile + (Choi -H2O) + (Argal -H2O -CN2H2) - 2H + H+
									477.21	(Hpla,Cl) + Leu/Ile + (Choi +CO -H) - 2H + H+
									284.16
									264.15	Choi + (Argal -CN2H2) -H2O -2H + H+
									219.07
									138.06	Choi -2H + H+
									122.02	Choi - O - 2H + H+
No1020	6.9	717.26	Hpla,Cl,Su	Leu/Ile	Choi	Argal			717.26	(Hpla,Cl,Su) + Leu/Ile + Choi + Argal + H+	717.23
		Aeruginosin 89; Ishida et al., 1999							637.31	(Hpla,Cl) + Leu/Ile + Choi + Argal + H+	637.32
									619.29	(Hpla,Cl) + Leu/Ile + Choi + Argal - H2O + H+	619.3
									577.26	(Hpla,Cl) + Leu/Ile + Choi + (Argal -CN2H2) - H2O + H+	577.29
									479.14	(Hpla,Cl) + Leu/Ile + (Choi +CO - H) + H+
									308.19	Choi + Argal - H2O + H+	308.21
									291.15	Choi + (Argal -NH3) - H2O + H+
									266.13	Choi + (Argal -CN2H2) - H2O + H+	266.19
									249.1
									221.11		221.16
									140.03	Choi + H+	140.11
No259	6.6	715.4							not frag	see No. 256
	8	689.21	Hpla,Cl,Su	Leu/Ile	Choi	Agm			689.21	(Hpla,Cl,Su) + Leu/Ile + Choi + Agm + H+
									609.28	(Hpla,Cl) + Leu/Ile + Choi + Agm + H+
									592.25	(Hpla,Cl) + Leu/Ile + Choi + (Agm -NH3) + H+
									567.21	(Hpla,Cl) + Leu/Ile + Choi + (Agm -CN2H2) + H+
									298.13	Choi + Agm + H+
									281.13	Choi + (Agm -NH3) + H+
									210.13	(Choi -C3H5NO) + (Agm -NH3) + H+
									139.97	Choi + H+
	8	687.21	Hpla,Cl,Su	Leu/Ile	(Choi -2H)	Agm			687.22	(Hpla,Cl,Su) + Leu/Ile + Choi + Agm -2H + H+
									607.28	(Hpla,Cl) + Leu/Ile + Choi + Agm -2H + H+
									590.29	(Hpla,Cl) + Leu/Ile + Choi + (Agm -NH3) -2H + H+
									565.31	(Hpla,Cl) + Leu/Ile + Choi + (Agm -CN2H2) -2H + H+
									477
									296.13	Choi + Agm -2H + H+
									279.14	Choi + (Agm -NH3) -2H + H+
									236.18
									208.05	(Choi -C3H5NO) + (Agm -NH3) -2H + H+
									138.07	Choi -2H + H+
	13.1	609.33	Hpla,Cl	Leu/Ile	Choi	Agm			609.33	(Hpla,Cl) + Leu/Ile + Choi + Agm + H+
									592.25	(Hpla,Cl) + Leu/Ile + Choi + (Agm -NH3) + H+
									298	Choi + Agm + H+
									281	Choi + (Agm -NH3) + H+
									210	(Choi -C3H5NO) + (Agm -NH3) + H+
									140	Choi + H+
	13.1	607.29	Hpla,Cl	Leu/Ile	(Choi -2H)	Agm			607.29	(Hpla,Cl) + Leu/Ile + Choi + Agm -2H + H+
									296.19	Choi + Agm -2H + H+
									279.13	Choi + (Agm -NH3) -2H + H+
									236.16
									208.06	(Choi -C3H5NO) + (Agm -NH3) -2H + H+
									137.97	Choi -2H + H+
No828	5.6	731.41	Hpla	Leu/Ile	Choi,Xyl	Aeap			731.41	Hpla + Leu/Ile + (Choi,Xyl) + Aeap + H+
									689.35	Hpla + Leu/Ile + (Choi,Xyl) + (Aeap -CN2H2) + H+
									599.34	Hpla + Leu/Ile + Choi + Aeap + H+
									557.32	Hpla + Leu/Ile + Choi + (Aeap -CN2H2) + H+
									454.24	(Choi,Xyl) + Aeap + H+
									435.24	Leu/Ile + Choi + Aeap + H+
									412.22	(Choi,Xyl) + (Aeap -CN2H2) + H+
									322.2	Choi + Aeap + H+
									305.16	Choi + (Aeap -NH3) + H+
									287.19	(Choi -H2O) + (Aeap -NH3) + H+
									280.16	Choi + (Aeap -CN2H2) + H+
									262.11	(Choi -H2O) + (Aeap -CN2H2) + H+
									140.06	Choi + H+
	6.3	771.33	Plac	Leu/Ile	Choi,Xyl,Su	Agm			771.33	Plac + Leu/Ile + (Choi,Xyl,Su) + Agm + H+
									691.39	Plac + Leu/Ile + (Choi,Xyl) + Agm + H+
									626.36
									559.34	Plac + Leu/Ile + Choi + Agm + H+
									430.24	(Choi,Xyl) + Agm + H+
									365.2
									323.13
									281.17	Choi + (Agm -NH3) + H+
									210.09	(Choi -C3H5NO) + (Agm -NH3) + H+
									140.03	Choi + H+
	7.8	795.33	Plac	Leu/Ile	Choi,Xyl,Su	Aeap			795.33	Plac + Leu/Ile + (Choi,Xyl,Su) + Aeap + H+
									715.38	Plac + Leu/Ile + (Choi,Xyl) + Aeap + H+
									673.37	Plac + Leu/Ile + (Choi,Xyl) + (Aeap -CN2H2) + H+
									583.34	Plac + Leu/Ile + Choi + Aeap + H+
									541.33	Plac + Leu/Ile + Choi + (Aeap -CN2H2) + H+
									463.29	(Leu/Ile +CO) + Choi + Aeap + H+
									454.23	(Choi,Xyl) + Aeap + H+
									435.3	Leu/Ile + Choi + Aeap + H+
									412.21	(Choi,Xyl) + (Aeap -CN2H2) + H+
									322.2	Choi + Aeap + H+
									305.18	Choi + (Aeap -NH3) + H+
									287.06	(Choi -H2O) + (Aeap -NH3) + H+
									280.18	Choi + (Aeap -CN2H2) + H+
									262.18	(Choi -H2O) + (Aeap -CN2H2) + H+
									140.09	Choi + H+
	8.8	691.41	Plac	Leu	Choi,Xyl	Agm			691.41	Plac + Leu + (Choi,Xyl) + Agm + H+
		Aeruginosid 126B; Ishida et al., 2007							626.36
									559.34	Plac + Leu + Choi + Agm + H+
									430.26	(Choi,Xyl) + Agm + H+
									413.23	(Choi,Xyl) + (Agm -NH3) + H+
									365.19
									323.16
									298.19	Choi + Agm + H+
									281.16	Choi + (Agm -NH3) + H+
									264.12
									210.06	(Choi -C3H5NO) + (Agm -NH3) + H+
									140.09	Choi + H+
	10.5	715.41	Plac	Leu/Ile	Choi,Xyl	Aeap			715.41	Plac + Leu/Ile + (Choi,Xyl) + Aeap + H+
									673.36	Plac + Leu/Ile + (Choi,Xyl) + (Aeap -CN2H2) + H+
									583.34	Plac + Leu/Ile + Choi + Aeap + H+
									541.34	Plac + Leu/Ile + Choi + (Aeap -CN2H2) + H+
									454.24	(Choi,Xyl) + Aeap + H+
									412.22	(Choi,Xyl) + (Aeap -CN2H2) + H+
									305.25	Choi + (Aeap -NH3) + H+
									287.13	(Choi -H2O) + (Aeap -NH3) + H+
									280.17	Choi + (Aeap -CN2H2) + H+
									262.15	(Choi -H2O) + (Aeap -CN2H2) + H+
									140.08	Choi + H+
	18.9	839.4	Plac	Leu/Ile	Choi,Xyl,Su	Agm,Prenyl			839.4	Plac + Leu/Ile + (Choi,Xyl,Su) + (Agm,Prenyl) + H+
									759.46	Plac + Leu/Ile + (Choi,Xyl) + (Agm,Prenyl) + H+
									717.42	Plac + Leu/Ile + (Choi,Xyl) + (Agm,Prenyl -CN2H2) + H+
									691.38	Plac + Leu/Ile + (Choi,Xyl) + Agm + H+
									649.37	Plac + Leu/Ile + (Choi,Xyl) + (Agm -CN2H2) + H+
									627.41	Plac + Leu/Ile + Choi + (Agm,Prenyl) + H+
									585.4	Plac + Leu/Ile + Choi + (Agm,Prenyl -CN2H2) + H+
									559.33	Plac + Leu/Ile + Choi + Agm + H+
									517.28	Plac + Leu/Ile + Choi + (Agm -CN2H2) + H+
									498.32	(Choi,Xyl) + (Agm,Prenyl) + H+
									481.28	(Choi,Xyl) + (Agm,Prenyl -NH3) + H+
									456.29	(Choi,Xyl) + (Agm,Prenyl -CN2H2) + H+
									430.25	(Choi,Xyl) + Agm + H+
									413.25	(Choi,Xyl) + (Agm -NH3) + H+
									388.23	(Choi,Xyl) + (Agm -CN2H2) + H+
									349.26	Choi + (Agm,Prenyl -NH3) + H+
									331.26	(Choi -H2O) + (Agm,Prenyl -NH3) + H+
									324.23	Choi + (Agm,Prenyl -CN2H2) + H+
									281.17	Choi + (Agm -NH3) + H+
									256.17	Choi + (Agm -CH2N2) + H+
									210.06	(Choi -C3H5NO) + (Agm -NH3) + H+
									140.09	Choi + H+
	22.1	759.48	Plac	Leu/Ile	Choi,Xyl	Agm,Prenyl			759.48	Plac + Leu/Ile + (Choi,Xyl) + (Agm,Prenyl) + H+
									717.44	Plac + Leu/Ile + (Choi,Xyl) + (Agm -CN2H2) + H+
									691.39	Plac + Leu/Ile + (Choi,Xyl) + Agm + H+
									627.43	Plac + Leu/Ile + Choi + (Agm,Prenyl) + H+
									585.41	Plac + Leu/Ile + Choi + (Agm,Prenyl -CN2H2) + H+
									559.37	Plac + Leu/Ile + Choi + Agm + H+
									517.28	Plac + Leu/Ile + Choi + (Agm -CN2H2) + H+
									498.31	(Choi,Xyl) + (Agm,Prenyl) + H+
									481.28	(Choi,Xyl) + (Agm,Prenyl -NH3) + H+
									456.31	(Choi,Xyl) + (Agm,Prenyl -CN2H2) + H+
									388.24	(Choi,Xyl) + (Agm -CN2H2) + H+
									349.26	Choi + (Agm,Prenyl -NH3) + H+
									331.23	(Choi -H2O) + (Agm,Prenyl -NH3) + H+
									281.15	Choi + (Agm -NH3) + H+
									256.16	Choi + (Agm -CH2N2) + H+
									210.07	(Choi -C3H5NO) + (Agm -NH3) + H+
									182.13	(Choi -C5H9NO) + (Agm -NH3) + H+
									140.06	Choi + H+
No790	5	717.22	Hpla,Cl,Su	Leu/Ile	Choi	Argal			717.22	(Hpla,Cl,Su) + Leu/Ile + Choi + Argal + H+
									637.29	(Hpla,Cl) + Leu/Ile + Choi + Argal + H+
									619.27	(Hpla,Cl) + Leu/Ile + Choi + (Argal -H2O) + H+
									577.26	(Hpla,Cl) + Leu/Ile + Choi + (Argal -H2O -CN2H2) + H+
									479.14	(Hpla,Cl) + Leu/Ile + Choi + CO + H+
									481.14
									392.11
									308.21	Choi + (Argal -H2O) + H+
									266.11	Choi + (Argal -H2O -CN2H2) + H+
									221.11
									140.05	Choi + H+
	13.6	759.24	Hpla,Cl,Su	Leu/Ile	Choi,Ac	Argal			759.24	(Hpla,Cl,Su) + Leu/Ile + (Choi,Ac) + Argal + H+
									679.29	(Hpla,Cl) + Leu/Ile + (Choi,Ac) + Argal + H+
									661.28	(Hpla,Cl) + Leu/Ile + (Choi,Ac) + (Argal -H2O) + H+
									619.25	(Hpla,Cl) + Leu/Ile + (Choi,Ac) + (Argal -H2O -CN2H2) + H+
									619.3	(Hpla,Cl) + Leu/Ile + (Choi -H2O) + Argal + H+
									521.15	(Hpla,Cl) + Leu/Ile + (Choi,Ac +CO -H) + H+
									308.16	(Choi -H2O) + Argal + H+
									291.28	(Choi -H2O) + (Argal -NH3) + H+
									263.11
									182.06	(Choi,Ac) + H+
									122.09	(Choi -H2O) + H+
	17.4	759.24	Hpla,Cl,Su	Leu/Ile	Choi,Ac	Argal			759.24	(Hpla,Cl,Su) + Ile + (Choi,Ac) + Argal + H+
									679.29	(Hpla,Cl) + Ile + (Choi,Ac) + Argal + H+
									661.28	(Hpla,Cl) + Ile + (Choi,Ac) + (Argal -H2O) + H+
									619.25	(Hpla,Cl) + Ile + (Choi,Ac) + (Argal -H2O -CN2H2) + H+
									521.15	(Hpla,Cl) + Ile + (Choi,Ac) + CO + H+
									308.16	(Choi -H2O) + Argal + H+
									291.28	(Choi -H2O) + (Argal -NH3) + H+
									263.11
									182.06	(Choi,Ac) + H+
									122.09	(Choi -H2O) + H+
No82	12.5	633.37	Hpla	Phe	Choi	Aeap			633.37	Hpla + Phe + Choi + Aeap + H+
									591.32	Hpla + Phe + Choi + (Aeap -CN2H2) + H+
									469.28	Phe + Choi + Aeap + H+
									427.26	Phe + Choi + (Aeap -CN2H2) + H+
									322.21	Choi + Aeap + H+
									305.17	Choi + (Aeap -NH3) + H+
									287.19	(Choi -H2O) + (Aeap -NH3) + H+
									280.17	Choi + (Aeap -CN2H2) + H+
									262.31	(Choi -H2O) + (Aeap -CN2H2) + H+
									253.11
									244.49
									140.09	Choi + H+
	19.8	593.37	Plac	Phe	Choi	Agm			593.37	Plac + Phe + Choi + Agm + H+
									281.17	Choi + (Agm -NH3) + H+
									210.06	(Choi -C3H5NO) + (Agm -NH3) + H+
									140.03	Choi + H+
	20.8	617.37	Plac	Phe	Choi	Aeap			617.37	Plac + Phe + Choi + Aeap + H+
									575.34	Plac + Phe + Choi + (Aeap -CN2H2) + H+
									469.3	Phe + Choi + Aeap + H+
									322.22	Choi + Aeap + H+
									305.18	Choi + (Aeap -NH3) + H+
									287.16	(Choi -H2O) + (Aeap -NH3) + H+
									280.19	Choi + (Aeap -CN2H2) + H+
									140	Choi + H+
No364	11.1	835.31	Hpla,Cl,Me	Leu/Ile	Choi,Xyl,Su	Agm			835.31	(Hpla,Cl,Me) + Leu/Ile + (Choi,Xyl,Su) + Agm + H+
									755.37	(Hpla,Cl,Me) + Leu/Ile + (Choi,Xyl) + Agm
									623.32	(Hpla,Cl,Me) + Leu/Ile + Choi + Agm + H+
									430.26	(Choi,Xyl) + Agm + H+
									281.16	Choi + (Agm -NH3) + H+
									210.05	(Choi -C3H5NO) + (Agm -NH3) + H+
									140.06	Choi + H+
	12.9	859.3	Hpla,Cl,Me	Leu/Ile	Choi,Xyl,Su	Aeap			859.3	(Hpla,Cl,Me) + Leu/Ile + (Choi,Xyl,Su) + Aeap + H+
									779.37	(Hpla,Cl,Me) + Leu/Ile + (Choi,Xyl) + Aeap + H+
									737.36	(HPla,Cl,Me) + Leu/Ile + (Choi,Xyl) + (Aeap -CN2H2)
									647.32	(HPla,Cl,Me) + Leu/Ile + Choi + Aeap
									605.29	(HPla,Cl,Me) + Leu/Ile + Choi + (Aeap -CN2H2)
									454.25	(Choi,Xyl) + Aeap + H+
									435	Leu/Ile + Choi + Aeap + H+
									322.2	Choi + Aeap + H+
									305.16	Choi + (Aeap -NH3) + H+
									287.16	(Choi -H2O) + (Aeap -NH3) + H+
									280.19	Choi + (Aeap -CN2H2) + H+
									262	(Choi -H2O) + (Aeap -CN2H2) + H+
									140.02	Choi + H+
	13.5	869.3	Hpla,Cl,Me	Leu/Ile,Cl	Choi,Xyl,Su	Agm			not frag
	13.8	703.28	Hpla,Cl,Me	Leu/Ile	Choi	Agm	Su		703.28	(HPla,Cl,Me) + Leu/Ile + Choi + Agm + Su + H+
									623.32	(HPla,Cl,Me) + Leu/Ile + Choi + Agm + H+
									581.29	(Hpla,Cl,Me) + Leu/Ile + Choi + (Agm -CN2H2) + H+
									411.27	Leu/Ile + Choi + Agm + H+
									392.27	Leu/Ile + Choi + (Agm -NH3) + H+
									298.22	Choi + Agm + H+
									281.16	Choi + (Agm -NH3) + H+
									210.07	(Choi -C3H5NO) + (Agm -NH3) + H+
									140.15	Choi + H+
	15	727.29	Hpla,Cl,Me	Leu/Ile	Choi	Aeap	Su		727.29	(HPla,Cl,Me) + Leu/Ile + Choi + Aeap + Su + H+
									647.32	(HPla,Cl,Me) + Leu/Ile + Choi + Aeap + H+
									605.3	(HPla,Cl,Me) + Leu/Ile + Choi + (Aeap -CN2H2)
									435.3	Leu/Ile + Choi + Aeap + H+
									393.27	Leu/Ile + Choi + (Aeap -CN2H2) + H+
									322.21	Choi + Aeap + H+
									305.16	Choi + (Aeap -NH3) + H+
									287.16	(Choi -H2O) + (Aeap -NH3) + H+
									280.12	Choi + (Aeap -CN2H2) + H+
									262.16	(Choi -H2O) + (Aeap -CN2H2) + H+
									140.01	Choi + H+
	15	893.26	Hpla,Cl,Me	Leu/Ile,Cl	Choi,Xyl	Aeap	Su		893.26	(Hpla,Cl,Me) + (Leu/Ile,Cl) + (Choi,Xyl,Su) + Aeap + H+
									813.26	(Hpla,Cl,Me) + (Leu/Ile,Cl) + (Choi,Xyl) + Aeap + H+
									777.35	(Hpla,Cl,Me) + (Leu/Ile -2H) + (Choi,Xyl) + Aeap + H+
									593.32	(Leu/Ile +CO -2H) + (Choi,Xyl) + Aeap + H+
									550.31	(Leu/Ile -N -3H) + (Choi,Xyl) + Aeap + H+
									508.29	(Leu/Ile -N -3H) + (Choi,Xyl) + (Aeap -CN2H2) + H+
									461.27	(Leu/Ile +CO -2H) + Choi + Aeap + H+
									419.25	(Leu/Ile +CO -2H) + Choi + (Aeap -CN2H2) + H+
									418.27	(Leu/Ile -N -3H) + Choi + Aeap + H+
									376.27
									279.16	(Leu/Ile +CO -2H) + (Choi -H) + H+
									236.11
									140.08	Choi + H+
No365	13.4	869.4	Hpla,Cl,Me	Leu/Ile, Cl	Choi,Xyl,Su	Agm			869.4	(Hpla,Cl,Me) + (Leu/Ile,Cl) + (Choi,Xyl,Su) + Agm + H+
									789.39	(Hpla,Cl,Me) + (Leu/Ile,Cl) + (Choi,Xyl) + Agm + H+
									753.41	(Hpla,Cl,Me) + (Leu/Ile -2H) + (Choi,Xyl) + Agm + H+
									569.35	(Leu/Ile +CO -2H) + (Choi,Xyl) + Agm + H+
									552.3	(Leu/Ile +CO -2H) + (Choi,Xyl) + (Agm -NH3) + H+
									526.35	(Leu/Ile -N -3H) + (Choi,Xyl) + Agm + H+
									504.29
									437.31	(Leu/Ile +CO -2H) + Choi + Agm + H+
									430.31	(Choi,Xyl) + Agm + H+
									420.26	(Leu/Ile +CO -2H) + Choi + (Agm -NH3) + H+
									402.26	(Leu/Ile +CO -2H) + (Choi -H2O) + (Agm -NH3) + H+
									395.28	(Leu/Ile +CO -2H) + Choi + (Agm -CN2H2) + H+
									324.23
									307.15	(Leu/Ile +CO -2H) + (Choi +CO -H) + H+
									298.19	Choi + Agm + H+
									281.15	Choi + (Agm -NH3) + H+
									261.12
									223.04
									210.06	(Choi -C3H5NO) + (Agm -NH3) + H+
									192.11
									140	Choi + H+
	14.9	893.4	Hpla,Cl,Me	Leu/Ile,Cl	Choi,Xyl,Su	Aeap			893.4	(Hpla,Cl,Me) + Leu/Ile,Cl + (Choi,Xyl,Su) + Aeap + H+
									813.4	(Hpla,Cl,Me) + Leu/Ile,Cl + (Choi,Xyl) + Aeap + H+
									777.4	(Hpla,Cl,Me) + (Leu/Ile -2H) + (Choi,Xyl) + Aeap + H+
									593.35	(Leu/Ile +CO -2H) + (Choi,Xyl) + Aeap + H+
									550.36	(Leu/Ile -N -3H) + (Choi,Xyl) + Aeap + H+
									508.37	(Leu/Ile -N -3H) + (Choi,Xyl) + (Aeap -CN2H2) + H+
									461.31	(Leu/Ile +CO -2H) + Choi + Aeap + H+
									444.28	(Leu/Ile +CO -2H) + Choi + (Aeap -NH3) + H+
									419.28	(Leu/Ile +CO -2H) + Choi + (Aeap -CN2H2) + H+
									418.25	(Leu/Ile -N -3H) + Choi + Aeap + H+
									401.26	(Leu/Ile -N -3H) + Choi + (Aeap -NH3) + H+
									376.27
									305.2	Choi + (Aeap -NH3) + H+
									287.19	(Choi -H2O) + (Aeap -NH3) + H+
									261.1
									236.1
									140.15	Choi + H+
No79	5.5	731.34	Hpla	Leu/Ile	Choi,Xyl	Aeap			731.34	Hpla + Leu/Ile + (Choi,Xyl) + Aeap + H+
									689.32	Hpla + Leu/Ile + (Choi,Xyl) + (Aeap -CN2H2) + H+
									599.32	Hpla + Leu/Ile + Choi + Aeap + H+
									567.32	Leu/Ile + (Choi,Xyl) + Aeap + H+
									557.3	Hpla + Leu/Ile + Choi + (Aeap -CN2H2) + H+
									454.22	(Choi,Xyl) + Aeap + H+
									412.21	(Choi,Xyl) + (Aeap -CN2H2) + H+
									322.2	Choi + Aeap + H+
									305.16	Choi + (Aeap -NH3) + H+
									287.14	(Choi -H2O) + (Aeap -NH3) + H+
									280.15	Choi + (Aeap -CN2H2) + H+
									262.12	(Choi -H2O) + (Aeap -CN2H2) + H+
									140.03	Choi + H+
	8.8	691.38	Plac	Leu	Choi,Xyl	Agm			691.38	Plac + Leu + (Choi,Xyl) + Agm + H+
		Aeruginosid 126B; Ishida et al., 2007							626.29
									559.33	Plac + Leu + Choi + Agm + H+
									430.22	(Choi,Xyl) + Agm + H+
									413.21	(Choi,Xyl) + (Agm -NH3) + H+
									365.2
									342.09
									323.18
									298.17	Choi + Agm + H+
									281.17	Choi + (Agm -NH3) + H+
									210.04	(Choi -C3H5NO) + (Agm -NH3) + H+
									140.11	Choi + H+
	10.4	715.35	Plac	Leu/Ile	Choi,Xyl	Aeap			715.35	Plac + Leu/Ile + (Choi,Xyl) + Aeap + H+
									673.33	Plac + Leu/Ile + (Choi,Xyl) + (Aeap -CN2H2) + H+
									583.32	Plac + Leu/Ile + Choi + Aeap + H+
									541.32	Plac + Leu/Ile + Choi + (Aeap -CN2H2) + H+
									454.23	(Choi,Xyl) + Aeap + H+
									435.27	Leu/Ile + Choi + Aeap + H+
									412.23	(Choi,Xyl) + (Aeap -CN2H2) + H+
									322	Choi + Aeap + H+
									305.16	Choi + (Aeap -NH3) + H+
									287.15	(Choi -H2O) + (Aeap -NH3) + H+
									280.17	Choi + (Aeap -CN2H2) + H+
									262.16	(Choi -H2O) + (Aeap -CN2H2) + H+
									140.08	Choi + H+
	22	759.43	Plac	Leu/Ile	Choi,Xyl	Agm,Prenyl			759.43	Plac + Leu/Ile + (Choi,Xyl) + (Agm,Prenyl) + H+
									717.4	Plac + Leu/Ile + (Choi,Xyl) + (Agm,Prenyl -CN2H2) + H+
									691.36	Plac + Leu/Ile + (Choi,Xyl) + (Agm) + H+
									649.34	Plac + Leu/Ile + (Choi,Xyl) + (Agm -CN2H2) + H+
									627.39	Plac + Leu/Ile + Choi + (Agm,Prenyl) + H+
									585.37	Plac + Leu/Ile + Choi + (Agm,Prenyl -CN2H2) + H+
									559.32	Plac + Leu/Ile + Choi + Agm + H+
									517.31	Plac + Leu/Ile + Choi + (Agm -CN2H2) + H+
									498.29	(Choi,Xyl) + (Agm,Prenyl) + H+
									481.27	(Choi,Xyl) + (Agm,Prenyl -NH3) + H+
									456.28	(Choi,Xyl) + (Agm,Prenyl -CN2H2) + H+
									430	(Choi,Xyl) + Agm + H+
									413	(Choi,Xyl) + (Agm -NH3) + H+
									388.21	(Choi,Xyl) + (Agm -CN2H2) + H+
									349.24	Choi + (Agm,Prenyl-NH3) + H+
									298	Choi + Agm + H+
									281.16	Choi + (Agm -NH3) + H+
									263.13	(Choi -H2O) + (Agm -NH3) + H+
									256.16	Choi + (Agm -CH2N2) + H+
									210.09	(Choi -C3H5NO) + (Agm -NH3) + H+
									140.11	Choi + H+
No250	7.4	805.25	Plac	Leu/Ile,Cl	Choi,Xyl,Su	Agm			805.25	Plac + Leu/Ile,Cl + (Choi,Xyl,Su) + Agm + H+
									725.32	Plca + Leu/Ile,Cl + (Choi,Xyl) + Agm + H+
									689.35	Plca + (Leu/Ile -2H) + (Choi,Xyl) + Agm + H+
									593.31	Plca + Leu/Ile,Cl + Choi + Agm + H+
									569.29	(Leu/Ile +CO -2H) + (Choi,Xyl) + Agm + H+
									540.27
									526.28	(Leu/Ile -N -3H) + (Choi,Xyl) + Agm + H+
									437.25	(Leu/Ile +CO -2H) + Choi + Agm + H+
									430.2	(Choi,Xyl) + Agm + H+
									420.23	(Leu/Ile +CO -2H) + Choi + (Agm -NH3) + H+
									307.08	(Leu/Ile +CO -2H) + (Choi +CO -H) + H+
									281.12	Choi + (Agm -NH3) + H+
									140.1	Choi + H+
	7.8	771.31	Plac	Leu/Ile	Choi,Xyl,Su	Agm			771.31	Plac + Leu/Ile + (Choi,Xyl,Su) + Agm + H+
									691.37	Plac + Leu/Ile + (Choi,Xyl) + Agm + H+
									626.34
									559.34	Plac + Leu/Ile + Choi + Agm + H+
									430	(Choi,Xyl) + Agm + H+
									281	Choi + (Agm -NH3) + H+
									210.05	(Choi -C3H5NO) + (Agm -NH3) + H+
									140.1	Choi + H+
	10.2	805.24	Plac	Leu/Ile,Cl	Choi,Xyl,Su	Agm			805.25	Plac + Leu/Ile,Cl + (Choi,Xyl,Su) + Agm + H+
									725.32	Plca + Leu/Ile,Cl + (Choi,Xyl) + Agm + H+
									689.35	Plca + (Leu/Ile -2H) + (Choi,Xyl) + Agm + H+
									593.31	Plca + Leu/Ile,Cl + Choi + Agm + H+
									569.29	(Leu/Ile +CO -2H) + (Choi,Xyl) + Agm + H+
									540.27
									526.28	(Leu/Ile -N -3H) + (Choi,Xyl) + Agm + H+
									437.25	(Leu/Ile +CO -2H) + Choi + Agm + H+
									430.2	(Choi,Xyl) + Agm + H+
									420.23	(Leu/Ile +CO -2H) + Choi + (Agm -NH3) + H+
									307.08	(Leu/Ile +CO -2H) + (Choi +CO -H) + H+
									281.12	Choi + (Agm -NH3) + H+
									140.1	Choi + H+
	10.7	691.38	Plac	Leu/Ile	Choi,Xyl	Agm			691.38	Plac + Leu/Ile + (Choi,Xyl) + Agm + H+
									626.31
									559.33	Plac + Leu/Ile + Choi + Agm + H+
									430.24	(Choi,Xyl) + Agm + H+
									413.21	(Choi,Xyl) + (Agm -NH3) + H+
									365.19
									323.19
									281.12	Choi + (Agm -NH3) + H+
									210.06	(Choi -C3H5NO) + (Agm -NH3) + H+
									140.03	Choi + H+
	13.7	725.33	Plac	Leu/Ile,Cl	Choi,Xyl	Agm			725.33	Plac + (Leu/Ile,Cl) + (Choi,Xyl) + Agm + H+
									689.35	Plac + (Leu/Ile -HCl) + (Choi,Xyl) + Agm + H+
									569.31	(Leu/Ile +CO -2H) + (Choi,Xyl) + Agm + H+
									540.28
									526.28	(Leu/Ile -N -3H) + (Choi,Xyl) + Agm + H+
									437.26	(Leu/Ile +CO -2H) + Choi + Agm + H+
									420.23	(Leu/Ile +CO -2H) + Choi + (Agm -NH3) + H+
									395.23	(Leu/Ile +CO -2H) + Choi + (Agm -CN2H2) + H+
									307.08	(Leu/Ile +CO -2H) + (Choi +CO -H) + H+
									281.15	Choi + (Agm -NH3) + H+
									279.13	(Leu/Ile +CO -2H) + (Choi -H) + H+
									210.02	(Choi -C3H5NO) + (Agm -NH3) + H+
									140.09	Choi + H+
	18.7	559.37	Plac	Leu/Ile	Choi	Agm			559.37	Plac + Leu/Ile + Choi + Agm + H+
									541.33	Plac + Leu/Ile + Choi + (Agm -NH3) + H+
									515.3
									445.22
									369.29
									281.15	Choi + (Agm -NH3) + H+
									210.02	(Choi -C3H5NO) + (Agm -NH3) + H+
									140.09	Choi + H+
No252	7.4	805.5	Plac	Leu/Ile,Cl	Choi,Xyl,Su	Agm			805.5	Plac + (Leu/Ile,Cl) + (Choi,Xyl,Su) + Agm + H+
									725.41	Plac + (Leu/Ile,Cl) + (Choi,Xyl) + Agm + H+
									689.43	Plac + (Leu/Ile -2H) + (Choi,Xyl) + Agm + H+
									569.25	(Leu/Ile +CO -2H) + (Choi,Xyl) + Agm + H+
									437.29	(Leu/Ile +CO -2H) + Choi + Agm + H+
									420.26	(Leu/Ile +CO -2H) + Choi + (Agm -NH3) + H+
									402.23	(Leu/Ile +CO -2H) + (Choi -H2O) + (Agm -NH3) + H+
									377.28	(Leu/Ile -N -3H) + Choi + (Agm -NH3) + H+
									281.23	Choi + (Agm -NH3) + H+
									279.16	(Leu/Ile +CO -2H) + (Choi -H) + H+
									140.08	Choi + H+
	7.8	771.42	Plac	Leu/Ile	Choi,Xyl,Su	Agm			771.42	Plac + Leu/Ile + (Choi,Xyl,Su) + Agm + H+
									691.45	Plac + Leu/Ile + (Choi,Xyl) + Agm + H+
									674.34	Plac + Leu/Ile + (Choi,Xyl) + (Agm -NH3) + H+
									626.34
									601.45
									559.38	Plac + Leu/Ile + Choi + Agm + H+
									517.34	Plac + Leu/Ile + Choi + (Agm -CN2H2) + H+
									430.29	(Choi,Xyl) + Agm + H+
									413.25	(Choi,Xyl) + (Agm -NH3) + H+
									388.36	(Choi,Xyl) + (Agm -CN2H2) + H+
									355.21
									323.24
									305.15
									281.19	Choi + (Agm -NH3) + H+
									272.07
									246.15
									210.08	(Choi -C3H5NO) + (Agm -NH3) + H+
									140	Choi + H+
	10.3	805.5	Plac	Leu/Ile,Cl	Choi,Xyl,Su	Agm			805.5	Plac + (Leu/Ile,Cl) + (Choi,Xyl,Su) + Agm
									725.42	Plac + (Leu/Ile,Cl) + (Choi,Xyl) + Agm
									689.43	Plac + (Leu/Ile +CO -2H) + (Choi,Xyl) + Agm + H+
									569.37	(Leu/Ile +CO -2H) + (Choi,Xyl) + Agm + H+
									526.36	(Leu/Ile -N -3H) + (Choi,Xyl) + Agm + H+
									437.31	(Leu/Ile +CO -2H) + Choi + Agm + H+
									420.28	(Leu/Ile +CO -2H) + Choi + (Agm -NH3) + H+
									307.16	(Leu/Ile +CO -2H) + (Choi +CO -H) + H+
									279.14	(Leu/Ile +CO -2H) + (Choi -H) + H+
									281.19	Choi + (Agm -NH3) + H+
									261.12
									210.04	(Choi -C3H5NO) + (Agm -NH3) + H+
									140	Choi + H+
	10.6	691.45	Plac	Leu/Ile	Choi,Xyl	Agm			691.45	Plac + Leu/Ile + (Choi,Xyl) + Agm + H+
									559.39	Plac + Leu/Ile + Choi + Agm + H+
									430.27	(Choi,Xyl) + Agm + H+
									365.22
									323.22
									281.17	Choi + (Agm -NH3) + H+
									263.18	(Choi -H2O) + (Agm -NH3) + H+
									210.05	(Choi -C3H5NO) + (Agm -NH3) + H+
									140.05	Choi + H+
	13.7	725.43	Plac	Leu/Ile, Cl	Choi,Xyl	Agm			725.43	Plac + (Leu/Ile,Cl) + (Choi,Xyl) + Agm + H+
									689.43	Plac + (Leu/Ile-H) + (Choi,Xyl) + Agm + H+
									569.36	(Leu/Ile +CO -2H) + (Choi,Xyl) + Agm + H+
									526.36	(Leu/Ile -N -3H) + (Choi,Xyl) + Agm + H+
									437.29	(Leu/Ile +CO -2H) + Choi + Agm + H+
									420.27	(Leu/Ile +CO -2H) + Choi + (Agm -NH3) + H+
									307.12	(Leu/Ile +CO -2H) + (Choi +CO -H) + H+
									281.19	Choi + (Agm -NH3) + H+
									279.15	(Leu/Ile +CO -2H) + (Choi -H) + H+
									261.09
									210.03	(Choi -C3H5NO) + (Agm -NH3) + H+
									140.02	Choi + H+
	18.7	559.39	Plac	Leu/Ile	Choi	Agm			559.39	Plac + Leu/Ile + Choi + Agm + H+
									298.21	Choi + Agm + H+
									281.18	Choi + (Agm -NH3) + H+
									210.02	(Choi -C3H5NO) + (Agm -NH3) + H+
									140	Choi + H+
	21.4	559.37	Plac	Leu/Ile	Choi	Agm			559.39	Plac + Leu/Ile + Choi + Agm + H+
									298.21	Choi + Agm + H+
									281.18	Choi + (Agm -NH3) + H+
									210.02	(Choi -C3H5NO) + (Agm -NH3) + H+
									140	Choi + H+
No256	6.6	717.31	Hpla,Cl,Su	Leu/Ile	Choi	Argal			717.31	(Hpla,Cl,Su) + Leu/Ile + Choi + Argal + H+
									637.38	(Hpla,Cl) + Leu/Ile + Choi + Argal + H+
									619.34	(Hpla,Cl) + Leu/Ile + Choi + Argal - H2O + H+
									577.34	(Hpla,Cl) + Leu/Ile + Choi + (Argal -CN2H2) -H2O + H+
									479.16	(Hpla,Cl) + Leu/Ile + (Choi +CO -H) + H+
									286
									266.09	Choi + (Argal -CN2H2) -H2O + H+
									221.16
									139.84	Choi + H+
	6.6	715.31	Hpla,Cl,Su	Leu/Ile	Choi	Argal			715.31	(Hpla,Cl,Su) + Leu/Ile + Choi + Argal - 2H + H+
									635.34	(Hpla,Cl) + Leu/Ile + Choi + Argal - 2H + H+
									617.32	(Hpla,Cl) + Leu/Ile + Choi + Argal - H2O - 2H + H+
									575.29	(Hpla,Cl) + Leu/Ile + Choi + (Argal -CN2H2) -H2O - 2H + H+
									477.2	(Hpla,Cl) + Leu/Ile + (Choi +CO -H) - 2H + H+
									284.08
									264.12	Choi + (Argal -CN2H2) -H2O -2H + H+
									219.08
									138.02	Choi -2H + H+
No320	8.8	691.38	Plac	Leu	Choi,Xyl	Agm			691.38	Plac + Leu + (Choi,Xyl) + Agm + H+
		Aeruginosid 126B; Ishida et al., 2007							626.31
									559.34	Plac + Leu + Choi + Agm + H+
									430.22	(Choi,Xyl) + Agm + H+
									413.09	(Choi,Xyl) + (Agm -NH3) + H+
									365.18
									281.16	Choi + (Agm -NH3) + H+
									210.04	(Choi -C3H5NO) + (Agm -NH3) + H+
									140.06	Choi + H+
	10.4	715.38	Plac	Leu/Ile	Choi,Xyl	Aeap			715.38	Plac + Leu/Ile + (Choi,Xyl) + Aeap + H+
									673.36	Plac + Leu/Ile + (Choi,Xyl) + (Aeap -CN2H2) + H+
									583.33	Plac + Leu/Ile + Choi + Aeap + H+
									541.44	Plac + Leu/Ile + Choi + (Aeap -CN2H2) + H+
									454.23	(Choi,Xyl) + Aeap + H+
									435.3	Leu/Ile + Choi + Aeap + H+
									412.22	(Choi,Xyl) + (Aeap -CN2H2) + H+
									322.2	Choi + Aeap + H+
									305.16	Choi + (Aeap -NH3) + H+
									287.13	(Choi -H2O) + (Aeap -NH3) + H+
									280.18	Choi + (Aeap -CN2H2) + H+
									263.18
									140.13	Choi + H+
	11.4	725.33	Plac	Leu/Ile,Cl	Choi,Xyl	Agm			725.33	Plac + Leu/Ile,Cl + (Choi,Xyl) + Agm + H+
									689.36	Plac + (Leu/Ile -2H) + (Choi,Xyl) + Agm + H+
									569.3	(Leu/Ile +CO -2H) + (Choi,Xyl) + Agm + H+
									526.31	(Leu/Ile -N -3H) + (Choi,Xyl) + Agm + H+
									437.22	(Leu/Ile +CO -2H) + Choi + Agm + H+
									420.25	(Leu/Ile +CO -2H) + Choi + (Agm -NH3) + H+
									402.21	(Leu/Ile +CO -2H) + (Choi -H2O) + (Agm -NH3) + H+
									392.22	Leu/Ile + Choi + (Agm -NH3) + H+
									377.21	(Leu/Ile -N -3H) + Choi + (Agm -NH3) + H+
									307.13	(Leu/Ile +CO -2H) + (Choi +CO -H) + H+
									281.17	Choi + (Agm -NH3) + H+
									279.11	(Leu/Ile +CO -2H) + (Choi -H) + H+
									210.07	(Choi -C3H5NO) + (Agm -NH3) + H+
									140.16	Choi + H+
	12.7	749.34	Plac	Leu/Ile,Cl	Choi,Xyl	Aeap			749.34	Plac + Leu/Ile,Cl + (Choi,Xyl) + Aeap + H+
									713.36	Plac + (Leu/Ile -2H) + (Choi,Xyl) + Aeap + H+
									593.3	(Leu/Ile +CO -2H) + (Choi,Xyl) + Aeap + H+
									550.29	(Leu/Ile -N -3H) + (Choi,Xyl) + Aeap + H+
									508.27	(Leu/Ile -N -3H) + (Choi,Xyl) + (Aeap -CN2H2) + H+
									461.24	(Leu/Ile +CO -2H) + Choi + Aeap + H+
									419.24	(Leu/Ile +CO -2H) + Choi + (Aeap -CN2H2) + H+
									376.2
									279.16	(Leu/Ile +CO -2H) + (Choi -H) + H+
									236.09
									140.08	Choi + H+
M.a. NIES-89	6.7	717.31	Hpla,Cl,Su	Leu	Choi	Argal			717.31	(Hpla,Cl,Su) + Leu + Choi + Argal + H+
		Aeruginosin 89; Ishida et al., 1999							637.35	(Hpla,Cl) + Leu + Choi + Argal + H+
									619.35	(Hpla,Cl) + Leu + Choi + Argal - H2O + H+
									577.3	(Hpla,Cl) + Leu + Choi + (Argal -CN2H2) - H2O + H+
									479.2	(Hpla,Cl) + Leu + (Choi +CO) + H+
									308.22	Choi + (Argal -H2O) + H+
									291.23	Choi + (Argal -H2O -NH3) + H+
									266.14	(Choi -H2O) + (Argal -CN2H2) + H+
									221.12
									140	Choi + H+
	8.4	717.3	Hpla,Cl,Su	Leu	Choi	Argal			717.31	(Hpla,Cl,Su) + Leu + Choi + Argal + H+
									637.35	(Hpla,Cl) + Leu + Choi + Argal + H+
									619.35	(Hpla,Cl) + Leu + Choi + Argal - H2O + H+
									577.3	(Hpla,Cl) + Leu + Choi + (Argal -CN2H2) - H2O + H+
									479.2	(Hpla,Cl) + Leu + (Choi +CO) + H+
									308.22	Choi + (Argal -H2O) + H+
									291.23	Choi + (Argal -H2O -NH3) + H+
									266.14	(Choi -H2O) + (Argal -CN2H2) + H+
									221.12
									140	Choi + H+
	9.3	717.34	Hpla,Cl,Su	Leu	Choi	Argal			717.31	(Hpla,Cl,Su) + Leu + Choi + Argal + H+
									637.35	(Hpla,Cl) + Leu + Choi + Argal + H+
									619.35	(Hpla,Cl) + Leu + Choi + Argal - H2O + H+
									577.3	(Hpla,Cl) + Leu + Choi + (Argal -CN2H2) - H2O + H+
									479.2	(Hpla,Cl) + Leu + (Choi +CO) + H+
									308.22	Choi + (Argal -H2O) + H+
									291.23	Choi + (Argal -H2O -NH3) + H+
									266.14	(Choi -H2O) + (Argal -CN2H2) + H+
									221.12
									140	Choi + H+

## Sheet: Table S5. List of Aer peptides
Table S5: List of Aer peptides and characterisation of Aer peptide structures as observed for 124 Planktothrix strains.
				Position 1										Position 2				Position 3									Position 4							Peptides
Lineage	Strain No	PCA Cluster	Number of Aer	aa		Cl	aerJ	Su	aerL2	Me	ORF9	Su	ORF4	aa		Cl	aerH	aa	Xyl	aerI	Su	ORF7	Su	aerL1	Ac	ORF2	aa		C2	aerC	orf3	Prenyl	H2O	[M+H]+ (Rt [min])	Sequence	[M+H]+ (Rt [min])	Sequence	[M+H]+ (Rt [min])	Sequence	[M+H]+ (Rt [min])	Sequence	[M+H]+ (Rt [min])	Sequence	[M+H]+ (Rt [min])	Sequence	[M+H]+ (Rt [min])	Sequence	[M+H]+ (Rt [min])	Sequence
1	No2A	I	2		Hpla	Cl	yes	Su	yes		no		no	Leu/Ile			no	Choi		no		no		no		yes	Argal			no	no			717,3 (6,8)	Hplac,Cl,Su-Leu/Ile-Choi-Argal	715,3 (6,8)	Hplac,Cl,Su-Leu/Ile-Choi-Argal (-2H)
1	No31/1	II	1		Hpla		no		no		yes		no	Leu			yes	Choi	Xyl	yes		no		no		no		Agm	C2	yes	yes			731,5 (5,6)	Hplac-Leu-Choi,Xyl-Aeap
1	No32	II	3	Plac	Hpla		no		no		no		no	Leu		Cl	yes	Choi	Xyl	yes		no		no		no		Agm	C2	yes	yes			731,5 (5,6)	Hplac-Leu-Choi,Xyl-Aeap	715,5 (10,4)	Plac-Leu-Choi,Xyl-Aeap	749,4 (12,4)	Plac-Leu,Cl-Choi,Xyl-Aeap
1	No39	II	0																															no Aer
1	No41	I	2		Hpla	Cl	yes	Su	yes		no		no	Leu/Ile			no	Choi		no		no		no		yes	Argal			no	no			717,3 (6,9)	Hplac,Cl,Su-Leu/Ile-Choi-Argal	715,3 (6,9)	Hplac,Cl,Su-Leu/Ile-Choi-Argal (-2H)
1	No63	I	2		Hpla	Cl	yes	Su	yes		no		no	Leu/Ile			no	Choi		no		no		no		yes	Argal			no	no			717,3 (7,1)	Hplac,Cl,Su-Leu/Ile-Choi-Argal	715,3 (7,1)	Hplac,Cl,Su-Leu/Ile-Choi-Argal (-2H)
1	No66	I	2		Hpla	Cl	yes	Su	yes		no		no	Leu/Ile			no	Choi		no		no		no		yes	Argal			no	no			717,3 (7,2)	Hplac,Cl,Su-Leu/Ile-Choi-Argal	715,3 (7,2)	Hplac,Cl,Su-Leu/Ile-Choi-Argal (-2H)
1	No79	II	4	Plac	Hpla		no		no		no		no	Leu			yes	Choi	Xyl	yes		no		no		no		Agm	C2	yes	yes	Prenyl		731,5 (5,5)	Hplac-Leu-Choi,Xyl-Aeap	691,5 (8,8)	Plac-Leu-Choi,Xyl-Agm	715,5 (10,4)	Plac-Leu-Choi,Xyl-Aeap	759,6 (22,0)	Plac-Leu-Choi,Xyl-Agm,Prenyl
1	No250	II	6	Plac			yes		no		yes	Su	yes	Leu(Ile)		Cl	yes	Choi	Xyl	yes	Su	yes		no		no		Agm		no	no			805,5 (7,4)	Plac,Su-Leu,Cl-Choi,Xyl-Agm	771,5 (7,8)	Plac-Leu-Choi,Xyl,Su-Agm	805,5 (10,2)	Plac-Leu,Cl-Choi,Xyl,Su-Agm	691,6 (10,7)	Plac-Leu-Choi,Xyl-Agm	725,5 (13,7)	Plac-Leu,Cl-Choi,Xyl-Agm	559,5 (18,7)	Plac-Leu-Choi-Agm
1	No251	II	6	Plac			yes		no		yes	Su	yes	Leu(Ile)		Cl	yes	Choi	Xyl	yes	Su	yes		no		no		Agm		no	no			805,5 (7,4)	Plac,Su-Leu,Cl-Choi,Xyl-Agm	771,5 (7,8)	Plac-Leu-Choi,Xyl,Su-Agm	805,5 (10,2)	Plac-Leu,Cl-Choi,Xyl,Su-Agm	691,6 (10,7)	Plac-Leu-Choi,Xyl-Agm	725,5 (13,8)	Plac-Leu,Cl-Choi,Xyl-Agm	559,5 (18,7)	Plac-Leu-Choi-Agm
1	No252	II	7	Plac			yes		no		no	Su	yes	Leu(Ile)		Cl	yes	Choi	Xyl	yes	Su	yes		no		no		Agm		no	no			805,5 (7,4)	Plac,Su-Leu,Cl-Choi,Xyl-Agm	771,5 (7,8)	Plac-Leu-Choi,Xyl,Su-Agm	805,5 (10,3)	Plac-Leu,Cl-Choi,Xyl,Su-Agm	691,6 (10,6)	Plac-Leu-Choi,Xyl-Agm	725,5 (13,7)	Plac-Leu,Cl-Choi,Xyl-Agm	559,5 (18,7)	Plac-Leu-Choi-Agm	559,5 (21,4)	Plac-Leu-Choi-Agm
1	No253	I	2		Hpla	Cl	yes	Su	yes		no		no	Leu/Ile			no	Choi		no		no		no	Ac	yes	Argal			no	no			759,3 (13,7)	Hplac,Cl,Su-Leu/Ile-Choi,Ac-Argal	759,3 (17,6)	Hplac,Cl,Su-Leu/Ile-Choi,Ac-Argal
1	No254	II	7	Plac			yes		no		no	Su	yes	Leu(Ile)		Cl	yes	Choi	Xyl	yes	Su	yes		no		no		Agm		no	no			805,5 (7,4)	Plac,Su-Leu,Cl-Choi,Xyl-Agm	771,5 (7,8)	Plac-Leu-Choi,Xyl,Su-Agm	805,5 (10,2)	Plac-Leu,Cl-Choi,Xyl,Su-Agm	691,6 (10,7)	Plac-Leu-Choi,Xyl-Agm	725,5 (13,7)	Plac-Leu,Cl-Choi,Xyl-Agm	559,5 (18,7)	Plac-Leu-Choi-Agm	559,5 (21,3)	Plac-Leu-Choi-Agm
1	No255	II	6	Plac			yes		no		yes	Su	yes	Leu(Ile)		Cl	yes	Choi	Xyl	yes	Su	yes		no		no		Agm		no	no			805,5 (7,5)	Plac,Su-Leu,Cl-Choi,Xyl-Agm	771,5 (7,8)	Plac-Leu-Choi,Xyl,Su-Agm	805,5 (10,2)	Plac-Leu,Cl-Choi,Xyl,Su-Agm	691,6 (10,6)	Plac-Leu-Choi,Xyl-Agm	725,5 (13,7)	Plac-Leu,Cl-Choi,Xyl-Agm	559,5 (18,7)	Plac-Leu-Choi-Agm
1	No256	I	2		Hpla	Cl	yes	Su	yes		no		no	Leu/Ile			no	Choi		no		no		no		yes	Argal			no	no			717,4 (6,6)	Hplac,Cl,Su-Leu/Ile-Choi-Argal	715,4 (6,6)	Hplac,Cl,Su-Leu/Ile-Choi-Argal (-2H)
1	No257	II	6	Plac			yes		no		yes	Su	yes	Leu(Ile)		Cl	yes	Choi	Xyl	yes	Su	yes		no		no		Agm		no	no			805,5 (7,5)	Plac,Su-Leu,Cl-Choi,Xyl-Agm	771,5 (8,0)	Plac-Leu-Choi,Xyl,Su-Agm	805,5 (10,2)	Plac-Leu,Cl-Choi,Xyl,Su-Agm	691,6 (10,7)	Plac-Leu-Choi,Xyl-Agm	725,5 (13,7)	Plac-Leu,Cl-Choi,Xyl-Agm	559,5 (18,7)	Plac-Leu-Choi-Agm
1	No259	I	6		Hpla	Cl	yes	Su	yes		no		no	Leu/Ile			no	Choi		no		no		no		yes	Argal	Agm		no	no			717,4 (6,6)	Hplac,Cl,Su-Leu/Ile-Choi-Argal	715,4 (6,6)	Hplac,Cl,Su-Leu/Ile-Choi-Argal (-2H)	689,2 (8,0)	Hplac,Cl,Su-Leu/Ile-Choi-Agm	687,2 (8,0)	Hplac,Cl,Su-Leu/Ile-Choi-Agm (-2H)	609,3 (13,1)	Hplac,Cl-Leu/Ile-Choi-Agm	607,3 (13,6)	Hplac,Cl-Leu/Ile-Choi-Agm (-2H)
1	No263	I	2		Hpla	Cl	yes	Su	yes		no		no	Leu/Ile			no	Choi		no		no		no	Ac	yes	Argal			no	no			759,3 (13,9)	Hplac,Cl,Su-Leu-Choi,Ac-Argal	759,3 (17,4)	Hplac,Cl,Su-Leu-Choi,Ac-Argal
1	No274	I	2		Hpla	Cl	yes	Su	yes		no		no	Leu/Ile			no	Choi		no		no		no		yes	Argal			no	no			717,4 (6,6)	Hplac,Cl,Su-Leu/Ile-Choi-Argal	715,4 (6,6)	Hplac,Cl,Su-Leu/Ile-Choi-Argal (-2H)
1	No281	I	6		Hpla	Cl	yes	Su	yes		no		no	Leu/Ile			no	Choi		no		no		no		yes	Argal	Agm		no	no			717,4 (6,6)	Hplac,Cl,Su-Leu/Ile-Choi-Argal	715,4 (6,6)	Hplac,Cl,Su-Leu/Ile-Choi-Argal (-2H)	689,2 (8,2)	Hplac,Cl,Su-Leu/Ile-Choi-Agm	687,2 (8,2)	Hplac,Cl,Su-Leu/Ile-Choi-Agm (-2H)	609,3 (13,2)	Hplac,Cl-Leu/Ile-Choi-Agm	607,3 (13,8)	Hplac,Cl-Leu/Ile-Choi-Agm (-2H)
1	No299	I	2		Hpla	Cl	yes	Su	yes		no		no	Leu/Ile			no	Choi		no		no		no		yes	Argal			no	no			717,4 (6,7)	Hplac,Cl,Su-Leu/Ile-Choi-Argal	715,4 (6,7)	Hplac,Cl,Su-Leu/Ile-Choi-Argal (-2H)
1	No307	I	6		Hpla	Cl	yes	Su	yes		no		no	Leu/Ile			no	Choi		no		no		no		yes	Argal	Agm		no	no			717,4 (6,5)	Hplac,Cl,Su-Leu/Ile-Choi-Argal	715,4 (6,5)	Hplac,Cl,Su-Leu/Ile-Choi-Argal (-2H)	689,2 (8,0)	Hplac,Cl,Su-Leu/Ile-Choi-Agm	687,2 (8,0)	Hplac,Cl,Su-Leu/Ile-Choi-Agm (-2H)	609,3 (12,7)	Hplac,Cl-Leu/Ile-Choi-Agm	607,3 (13,5)	Hplac,Cl-Leu-Choi-Agm (-2H)
1	No320	II	4	Plac			no		no		yes	no	yes	Leu		Cl	yes	Choi	Xyl	yes		yes		no		no		Agm	C2	yes	yes			691,5 (8,8)	Plac-Leu-Choi,Xyl-Agm	715,5 (10,4)	Plac-Leu-Choi,Xyl-Aeap	725,4 (11,4)	Plac-Leu,Cl-Choi,Xyl-Agm	749,4 (12,7)	Plac-Leu,Cl-Choi,Xyl-Aeap
1	No354	II	6		Hpla		no		no		no		no		Phe		yes	Choi	Xyl	yes	Su	yes	Su	yes		no		Agm	C2	yes	yes			821,5 (4,7)	Hplac-Phe-Choi,Xyl,Su-Agm	845,5 (5,5)	Hplac-Phe-Choi,Xyl,Su-Aeap	689,4 (6,1)	Hplac-Phe-Choi,Su-Agm	713,4 (6,8)	Hplac-Phe-Choi,Su-Aeap	609,5 (11,9)	Hplac-Phe-Choi-Agm	633,4 (12,5)	Hplac-Phe-Choi-Aeap
1	No394	II	1		Hpla		no		no		yes		no		Phe		no	Choi		no		yes	Su	yes		no		Agm		no	no			689,4 (6,1)	Hplac-Phe-Choi,Su-Agm
1	No759	I	2		Hpla	Cl	yes	Su	yes		no		no	Leu/Ile			no	Choi		no		no		no		yes	Argal			no	no			717,3 (6,6)	Hplac,Cl,Su-Leu/Ile-Choi-Argal	715,3 (6,6)	Hplac,Cl,Su-Leu/Ile-Choi-Argal (-2H)
1	No760	II	0																															no Aer
1	No781	I	5		Hpla	Cl	yes	Su	yes		no		no	Leu/Ile			no	Choi		no		no		no		yes	Argal			no	no		H2O	717,4 (5,0)	Hplac,Cl,Su-Leu/Ile-Choi-Argal	735,4 (5,0)	Hplac,Cl,Su-Leu/Ile-Choi-Argal (H2O)	717,4 (5,9)	Hplac,Cl,Su-Leu/Ile-Choi-Argal	717,4 (7,5)	Hplac,Cl,Su-Leu/Ile-Choi-Argal	655,4 (9,1)	Hplac,Cl-Leu/Ile-Choi-Argal (H2O)
1	No787	I	2		Hpla	Cl	yes	Su	yes		no		no	Leu/Ile			no	Choi		no		no		no		yes	Argal			no	no			717,3 (7,1)	Hplac,Cl,Su-Leu/Ile-Choi-Argal	715,3 (7,1)	Hplac,Cl,Su-Leu/Ile-Choi-Argal (-2H)
1	No788	I	3		Hpla	Cl	yes	Su	yes		no		no	Leu/Ile			no	Choi		no		no		no	Ac	yes	Argal			no	no			717,4 (4,9)	Hplac,Cl,Su-Leu/Ile-Choi-Argal	759,3 (13,8)	Hplac,Cl,Su-Leu/Ile-Choi,Ac-Argal	759,3 (17,3)	Hplac,Cl,Su-Leu/Ile-Choi,Ac-Argal
1	No790	I	3		Hpla	Cl	yes	Su	yes		no		no	Leu/Ile			no	Choi		no		no		no	Ac	yes	Argal			no	no			717,4 (5,0)	Hplac,Cl,Su-Leu/Ile-Choi-Argal	759,3 (13,6)	Hplac,Cl,Su-Leu/Ile-Choi,Ac-Argal	759,3 (17,4)	Hplac,Cl,Su-Leu/Ile-Choi,Ac-Argal
1	No828	II	7	Plac	Hpla		no		no		no	no	yes	Leu			yes	Choi	Xyl	yes	Su	yes		no		no		Agm	C2	yes	yes	Prenyl		731,5 (5,6)	Hplac-Leu-Choi,Xyl-Aeap	771,5 (6,3)	Plac-Leu-Choi,Xyl,Su-Agm	795,5 (7,8)	Plac-Leu-Choi,Xyl,Su-Aeap	691,5 (8,8)	Plac-Leu-Choi,Xyl-Agm	715,5 (10,5)	Plac-Leu-Choi,Xyl-Aeap	839,5 (18,9)	Plac-Leu-Choi,Xyl,Su-Agm,Prenyl	759,6 (22,1)	Plac-Leu-Choi,Xyl-Agm,Prenyl
1	No829	I	4		Hpla	Cl	yes	Su	yes		no		no	Leu/Ile			no	Choi		no		no		no		yes	Argal			no	no		H2O	717,4 (5,0)	Hplac,Cl,Su-Leu/Ile-Choi-Argal	735,4 (5,0)	Hplac,Cl,Su-Leu/Ile-Choi-Argal (H2O)	717,4 (5,9)	Hplac,Cl,Su-Leu/Ile-Choi-Argal	717,4 (7,4)	Hplac,Cl,Su-Leu/Ile-Choi-Argal
1	No976	II	3		Hpla	Cl	yes		no	Me	yes		no	Leu		Cl	yes	Choi	Xyl	yes	Su	yes		no		no		Agm		no	no			821,3 (5,6)	Hplac-Leu,Cl-Choi,Xyl,Su-Agm	855,4 (7,0)	Hplac,Cl-Leu,Cl-Choi,Xyl,Su-Agm	869,3 (13,5)	Hplac,Cl,Me-Leu,Cl-Choi,Xyl,Su-Agm
1	PH123	II	0																															no
1	SAG5.81	I	2		Hpla	Cl	yes	Su	yes		yes		no	Leu/Ile			no	Choi		no		no		no		yes	Argal			no	no			717,3 (7,1)	Hplac,Cl,Su-Leu/Ile-Choi-Argal	715,3 (7,1)	Hplac,Cl,Su-Leu/Ile-Choi-Argal (-2H)
1	CCAP1459.15	I	2		Hpla	Cl	yes	Su	yes		no		no	Leu/Ile			no	Choi		no		no		no		yes	Argal			no	no			717,3 (7,1)	Hplac,Cl,Su-Leu/Ile-Choi-Argal	715,3 (7,1)	Hplac,Cl,Su-Leu/Ile-Choi-Argal (-2H)
1	NIVA-CYA116	I	5		Hpla	Cl	yes	Su	yes		no		no	Leu/Ile			no	Choi		no		no		no	Ac	yes	Argal	Agm		no	no			689,2 (8,1)	Hplac,Cl,Su-Leu/Ile-Choi-Agm	687,2 (8,1)	Hplac,Cl,Su-Leu/Ile-Choi-Agm (-2H)	759,3 (13,4)	Hplac,Cl,Su-Leu/Ile-Choi,Ac-Argal	731,2 (16,0)	Hplac,Cl,Su-Leu/Ile-Choi,Ac-Agm	759,3 (17,8)	Hplac,Cl,Su-Leu/Ile-Choi,Ac-Argal
1	NIVA-CYA126/8	II	2	Plac	Hpla		no		no		no		no	Leu			yes	Choi	Xyl	yes		no		no		no		Agm	C2	yes	yes			731,5 (5,4)	Hplac-Leu-Choi,Xyl-Aeap	715,5 (10,1)	Plac-Leu-Choi,Xyl-Aeap
1	PCC7805	II	6		Hpla	Cl	yes		no	Me	yes	no	yes	Leu		Cl	yes	Choi	Xyl	yes	Su	yes		no		no		Agm		no	no			741,4 (7,9)	Hplac,Cl-Leu-Choi,Xyl-Agm	775,3 (9,6)	Hplac,Cl-Leu,Cl-Choi,Xyl-Agm	835,4 (11,1)	Hplac,Cl,Me-Leu-Choi,Xyl,Su-Agm	869,3 (13,6)	Hplac,Cl,Me-Leu,Cl-Choi,Xyl,Su-Agm	755,5 (14,4)	Hplac,Cl,Me-Leu-Choi,Xyl-Agm	789,4 (17,3)	Hplac,Cl,Me-Leu,Cl-Choi,Xyl-Agm
1	PCC7811	I	2		Hpla	Cl	yes	Su	yes		no		no	Leu/Ile			no	Choi		no		no		no		yes	Argal			no	no			717,3 (6,5)	Hplac,Cl,Su-Leu/Ile-Choi-Argal	715,3 (6,5)	Hplac,Cl,Su-Leu/Ile-Choi-Argal (-2H)
1	NIES-596	II	9		Hpla	Cl	yes		no	Me	yes	Su	yes	Leu		Cl	yes	Choi	Xyl	yes	Su	yes		no		no		Agm		no	no			821,3 (4,6)	Hplac,Su-Leu,Cl-Choi,Xyl-Agm	707,4 (5,3)	Hplac-Leu-Choi,Xyl-Agm	821,3 (5,5)	Hplac-Leu,Cl-Choi,Xyl,Su-Agm	855,4 (6,9)	Hplac,Cl-Leu,Cl-Choi,Xyl,Su-Agm	741,4 (7,8)	Hplac,Cl-Leu-Choi,Xyl-Agm	775,5 (9,6)	Hplac,Cl-Leu,Cl-Choi,Xyl-Agm	869,3 (10,4)	Hplac,Cl,Me,Su-Leu,Cl-Choi,Xyl-Agm	869,3 (13,5)	Hplac,Cl,Me-Leu,Cl-Choi,Xyl,Su-Agm
1A	No277	II	0																															no Aer
1A	No364	II	6		Hpla	Cl	yes		no	Me	yes		no	Leu		Cl	yes	Choi	Xyl	yes	Su	yes	Su	yes		no		Agm	C2	yes	yes			835,4 (10,1)	Hplac,Cl,Me-Leu-Choi,Xyl,Su-Agm	859,3 (12,9)	Hplac,Cl,Me-Leu-Choi,Xyl,Su-Aeap	869,3 (13,5)	Hplac,Cl,Me-Leu,Cl-Choi,Xyl,Su-Agm	703,3 (13,8)	Hplac,Cl,Me-Leu-Choi,Su-Agm	893,4 (15,0)	Hplac,Cl,Me-Leu,Cl-Choi,Xyl,Su-Aeap	727,4 (15,0)	Hplac,Cl,Me-Leu-Choi,Su-Aeap
1A	No365	II	2		Hpla	Cl	yes		no	Me	yes		no	Leu		Cl	yes	Choi	Xyl	yes	Su	yes		yes		no		Agm	C2	yes	yes			869,3 (13,4)	Hplac,Cl,Me-Leu,Cl-Choi,Xyl,Su-Agm	893,4 (14,9)	Hplac,Cl,Me-Leu,Cl-Choi,Xyl,Su-Aeap
1A	No371	II	3		Hpla		no		no		yes		no		Phe		yes	Choi	Xyl	yes	Su	yes		no		no		Agm	C2	yes	yes			821,5 (4,8)	Hplac-Phe-Choi,Xyl,Su-Agm	845,5 (5,5)	Hplac-Phe-Choi,Xyl,Su-Aeap	609,5 (11,9)	Hplac-Phe-Choi-Agm
1A	No372	II	3		Hpla		no		no		no		no		Phe		yes	Choi	Xyl	yes	Su	yes		no		no		Agm	C2	yes	yes			821,5 (4,7)	Hplac-Phe-Choi,Xyl,Su-Agm	845,5 (5,5)	Hplac-Phe-Choi,Xyl,Su-Aeap	609,5 (11,9)	Hplac-Phe-Choi-Agm
1A	No384	II	5		Hpla	Cl	yes		no	Me	yes		no	Leu		Cl	yes	Choi	Xyl	yes	Su	yes	Su	yes		no		Agm	C2	yes	yes			835,4 (1,1)	Hplac,Cl,Me-Leu-Choi,Xyl,Su-Agm	859,3 (12,9)	Hplac,Cl,Me-Leu-Choi,Xyl,Su-Aeap	703,3 (13,8)	Hplac,Cl,Me-Leu-Choi,Su-Agm	893,4 (14,9)	Hplac,Cl,Me-Leu,Cl-Choi,Xyl,Su-Aeap	727,4 (14,9)	Hplac,Cl,Me-Leu-Choi,Su-Aeap
1A	No390	II	2		Hpla		no		no		yes	no	yes		Phe		yes	Choi		no		yes	Su	yes		no		Agm		no	no			689,4 (6,1)	Hplac-Phe-Choi,Su-Agm	609,5 (11,9)	Hplac-Phe-Choi-Agm
1A	No396	II	3	Plac			no		no		no		no		Phe		yes	Choi	Xyl	yes	Su	yes	Su	yes		no		Agm	C2	yes	yes			829,5 (9,8)	Plac-Phe-Choi,Xyl,Su-Aeap	673,4 (10,1)	Plac-Phe-Choi,Su-Agm	697,4 (12,2)	Plac-Phe-Choi,Su-Aeap
1A	No553	II	4		Hpla		no		no		no		no		Phe		yes	Choi	Xyl	yes	Su	yes		no		no		Agm	C2	yes	yes			821,5 (4,7)	Hplac-Phe-Choi,Xyl,Su-Agm	845,5 (5,5)	Hplac-Phe-Choi,Xyl,Su-Aeap	741,5 (7,4)	Hplac-Phe-Choi,Xyl-Agm	609,5 (11,9)	Hplac-Phe-Choi-Agm
1A	No557	II	4		Hpla		no		no		no		no		Phe		yes	Choi	Xyl	yes	Su	yes		no		no		Agm	C2	yes	yes			821,5 (4,7)	Hplac-Phe-Choi,Xyl,Su-Agm	845,5 (5,5)	Hplac-Phe-Choi,Xyl,Su-Aeap	741,5 (7,4)	Hplac-Phe-Choi,Xyl-Agm	609,5 (12,0)	Hplac-Phe-Choi-Agm
2	No3	II	2	Plac			no		no		no		no	Leu		Cl	yes	Choi	Xyl	yes	Su	yes		no		no		Agm	C2	yes	yes			795,5 (9,5)	Plac-Leu-Choi,Xyl,Su-Aeap	829,5 (11,6)	Plac-Leu,Cl-Choi,Xyl,Su-Aeap
2	No21-	II	0																															no Aer
2	No40	II	0																															no Aer
2	No64	II	0																															no Aer
2	No67	II	2	Plac			no		no		no		no	Leu(Ile)		Cl	yes	Choi	Xyl	yes		no		no		no		Agm		no	yes			691,6 (10,6)	Plac-Leu-Choi,Xyl-Agm	725,5 (13,6)	Plac-Leu,Cl-Choi,Xyl-Agm
2	No80	II	4	Plac			no		no		no		no	Leu		Cl	yes	Choi	Xyl	yes	Su	yes		no		no		Agm	C2	yes	yes			771,5 (7,8)	Plac-Leu-Choi,Xyl,Su-Agm	795,5 (9,4)	Plac-Leu-Choi,Xyl,Su-Aeap	805,5 (10,2)	Plac-Leu,Cl-Choi,Xyl,Su-Agm	829,5 (11,6)	Plac-Leu,Cl-Choi,Xyl,Su-Aeap
2	No82	II	3	Plac	Hpla		no		no		no		no		Phe		yes	Choi		no		yes		no		no		Agm	C2	yes	yes			633,4 (12,5)	Hplac-Phe-Choi-Aeap	593,3 (19,8)	Plac-Phe-Choi-Agm	617,3 (20,8)	Plac-Phe-Choi-Aeap
2	No83	II	3	Plac	Hpla		no		no		no		no		Phe		yes	Choi		no		yes		no		no		Agm	C2	yes	yes			633,4 (12,6)	Hplac-Phe-Choi-Aeap	593,3 (20,0)	Plac-Phe-Choi-Agm	617,3 (20,9)	Plac-Phe-Choi-Aeap
2	No91/1	II	3	Plac			no		no		no		no	Leu		Cl	yes	Choi	Xyl	yes	Su	yes		no		no		Agm	C2	yes	yes			771,5 (7,8)	Plac-Leu-Choi,Xyl,Su-Agm	805,5 (10,1)	Plac-Leu,Cl-Choi,Xyl,Su-Agm	829,5 (11,6)	Plac-Leu,Cl-Choi,Xyl,Su-Aeap
2	No97	II	3	Plac			no		no		no		no	Leu		Cl	yes	Choi	Xyl	yes	Su	yes		no		no		Agm	C2	yes	yes			771,5 (7,7)	Plac-Leu-Choi,Xyl,Su-Agm	805,5 (10,2)	Plac-Leu,Cl-Choi,Xyl,Su-Agm	829,5 (11,5)	Plac-Leu,Cl-Choi,Xyl,Su-Aeap
2	No108	II	2	Plac			no		no		no		no	Leu		Cl	yes	Choi	Xyl	yes	Su	yes		no		no		Agm		no	no			771,5 (6,4)	Plac-Leu-Choi,Xyl,Su-Agm	805,3 (8,1)	Plac-Leu,Cl-Choi,Xyl,Su-Agm
2	No110	II	0																															no Aer
2	No111	II	3	Plac			no		no		no		no	Leu		Cl	yes	Choi	Xyl	yes	Su	yes		no		no		Agm	C2	yes	yes			771,5 (7,8)	Plac-Leu-Choi,Xyl,Su-Agm	795,5 (9,5)	Plac-Leu-Choi,Xyl,Su-Aeap	829,5 (11,5)	Plac-Leu,Cl-Choi,Xyl,Su-Aeap
2	No139	II	0																															no Aer
2	No145	II	0																															no Aer
2	No161	II	0																															no Aer
2	No166	II	0																															no Aer
2	No169	II	0																															no Aer
2	No170	II	0																															no Aer
2	No178	II	0																															no Aer
2	No260	II	0																															no Aer
2	No403	II	2	Plac			no		no		no		no	Leu		Cl	yes	Choi	Xyl	yes	Su	yes		no		no		Agm	C2	yes	yes			795,5 (7,9)	Plac-Leu-Choi,Xyl,Su-Aeap	829,3 (9,5)	Plac-Leu,Cl-Choi,Xyl,Su-Aeap
2	No405	II	1		Hpla		no		no		no		no	Leu(Ile)		Cl	yes	Choi	Xyl	yes	Su	yes		no		no		Agm	C2	yes	yes			845,5 (5,5)	Hplac-Leu,Cl-Choi,Xyl,Su-Aeap
2	No406	II	1		Hpla		no		no		no		no	Leu(Ile)		Cl	yes	Choi	Xyl	yes	Su	yes		no		no		Agm	C2	yes	yes			845,5 (5,5)	Hplac-Leu,Cl-Choi,Xyl,Su-Aeap
2	No496/1	II	1		Hpla		no		no		no		no	Leu(Ile)		Cl	yes	Choi	Xyl	yes	Su	yes		no		no		Agm	C2	yes	yes			845,5 (5,4)	Hplac-Leu,Cl-Choi,Xyl,Su-Aeap
2	No550	II	1		Hpla		no		no		no		no	Leu(Ile)		Cl	yes	Choi	Xyl	yes	Su	yes		no		no		Agm	C2	yes	yes			845,5 (5,4)	Hplac-Leu,Cl-Choi,Xyl,Su-Aeap
2	No551	II	1		Hpla		no		no		no		no	Leu(Ile)		Cl	yes	Choi	Xyl	yes	Su	yes		no		no		Agm	C2	yes	yes			845,5 (5,5)	Hplac-Leu,Cl-Choi,Xyl,Su-Aeap
2	No761	II	0																															no Aer
2	No762	II	0																															no Aer
2	No776	II	5	Plac	Hpla		no		no		no	no	yes		Phe		yes	Choi	Xyl	yes		yes		no		no		Agm	C2	yes	yes			765,5 (9,8)	HPlac-Phe-Choi,Xyl-Aeap	765,5 (11,0)	HPlac-Phe-Choi,Xyl-Aeap	725,5 (12,4)	Plac-Phe-Choi,Xyl-Agm	749,5 (13,7)	Plac-Phe-Choi,Xyl-Aeap	617,3 (21,0)	Plac-Phe-Choi-Aeap
2	No778	II	5	Plac	Hpla		no		no		no	no	yes		Phe		yes	Choi	Xyl	yes		yes		no		no		Agm	C2	yes	yes			765,5 (9,8)	HPlac-Phe-Choi,Xyl-Aeap	765,5 (11,1)	HPlac-Phe-Choi,Xyl-Aeap	725,5 (12,4)	Plac-Phe-Choi,Xyl-Agm	749,5 (13,7)	Plac-Phe-Choi,Xyl-Aeap	617,3 (21,0)	Plac-Phe-Choi-Aeap
2	No804	II	2	Plac			no		no		no		no	Leu		Cl	yes	Choi	Xyl	yes	Su	yes		no		no		Agm	C2	yes	yes			805,5 (10,2)	Plac-Leu,Cl-Choi,Xyl,Su-Agm	829,5 (11,6)	Plac-Leu,Cl-Choi,Xyl,Su-Aeap
2	No806	II	1	Plac			no		no		no		no	Leu(Ile)			no	Choi	Xyl	yes	Su	yes		no		no		Agm	C2	yes	yes			795,5 (9,0)	Plac-Leu-Choi,Xyl,Su-Aeap
2	No808	II	1	Plac			no		no		no		no	Leu(Ile)			no	Choi	Xyl	yes	Su	yes		no		no		Agm	C2	yes	yes			795,5 (9,0)	Plac-Leu-Choi,Xyl,Su-Aeap
2	No839	II	5	Plac	Hpla		no		no		no	no	yes		Phe		yes	Choi	Xyl	yes		yes		no		no		Agm	C2	yes	yes			765,5 (9,7)	HPlac-Phe-Choi,Xyl-Aeap	765,5 (11,1)	HPlac-Phe-Choi,Xyl-Aeap	725,5 (12,4)	Plac-Phe-Choi,Xyl-Agm	749,5 (13,8)	Plac-Phe-Choi,Xyl-Aeap	617,3 (21,0)	Plac-Phe-Choi-Aeap
2	CCAP1459.11A	II	0																															no Aer
2	CCAP1459.16	II	0																															no Aer
2	CCAP1459.17	II	0																															no Aer
2	CCAP1459.30	II	1	Plac			no		no		no		no	Leu		Cl	yes	Choi	Xyl	yes	Su	yes		no		no		Agm	C2	yes	yes			829,5 (11,5)	Plac-Leu,Cl-Choi,Xyl,Su-Aeap
2	CCAP1459.31	II	0																															no Aer
2	NIVA-CYA98	II	3	Plac	Hpla		no		no		no		no		Phe		yes	Choi		no		yes		no		no		Agm	C2	yes	yes			633,4 (12,6)	Hplac-Phe-Choi-Aeap	593,3 (20,0)	Plac-Phe-Choi-Agm	617,3 (21,0)	Plac-Phe-Choi-Aeap
2	NIVA-CYA406	II	3	Plac	Hpla		no		no		no		no		Phe		yes	Choi		no		yes		no		no		Agm	C2	yes	yes			633,4 (12,6)	Hplac-Phe-Choi-Aeap	593,3 (20,0)	Plac-Phe-Choi-Agm	617,3 (20,9)	Plac-Phe-Choi-Aeap
2	NIVA-CYA407	II	0																															no Aer
2	NIVA-CYA540	II	3	Plac			no		no		no	Su	yes	Leu			no	Choi		no		yes	Su	yes		no		Agm	C2	yes	yes			639,3 (8,3)	Plac-Leu-Choi-Agm (Su)	663,3 (9,4)	Plac-Leu-Choi-Aeap (Su)	663,5 (11,1)	Plac-Leu-Choi-Aeap (Su)
2	PCC7821	II	3	Plac	Hpla		no		no		no		no		Phe		yes	Choi		no		yes		no		no		Agm	C2	yes	yes			633,4 (12,6)	Hplac-Phe-Choi-Aeap	593,3 (19,9)	Plac-Phe-Choi-Agm	617,3 (20,8)	Plac-Phe-Choi-Aeap
2A	No757	II	0																															no Aer
2A	No758	II	0																															no Aer
2A	No763	II	0																															no Aer
2A	No764	II	0																															no Aer
2A	No765	II	0																															no Aer
2A	No766	II	0																															no Aer
2A	No769	II	0																															no Aer
2A	No770	II	0																															no Aer
2A	No771	II	0																															no Aer
2A	No772	II	0																															no Aer
2A	No873	II	0																															no Aer
2A	CCAP1459.36	II	5	Plac			no		no		no	Su	yes	Leu			no	Choi		no		yes	Su	yes		no		Agm	C2	yes	yes			639,3 (8,3)	Plac-Leu-Choi-Agm (Su)	663,3 (9,3)	Plac-Leu-Choi-Aeap (Su)	663,5 (11,1)	Plac-Leu-Choi-Aeap (Su)	583,5 (16,1)	Plac-Leu-Choi-Aeap	583,5 (19,5)	Plac-Leu-Choi-Aeap
2A	NIVA-CYA15	II	0																															no Aer
2A	NIVA-CYA34	II	4	Plac			no		no		no	Su	yes	Leu			no	Choi		no		yes	Su	yes		no		Agm	C2	yes	yes			639,3 (8,4)	Plac-Leu-Choi-Agm (Su)	663,3 (9,4)	Plac-Leu-Choi-Aeap (Su)	663,5 (11,2)	Plac-Leu-Choi-Aeap (Su)	583,5 (16,4)	Plac-Leu-Choi-Aeap
2A	NIVA-CYA56/3	II	0																															no Aer
2A	NIVA-CYA405	II	3	Plac			no		no		no	Su	yes	Leu			no	Choi		no		yes	Su	yes		no		Agm	C2	yes	yes			639,3 (8,3)	Plac-Leu-Choi-Agm (Su)	663,3 (9,3)	Plac-Leu-Choi-Aeap (Su)	663,5 (11,2)	Plac-Leu-Choi-Aeap (Su)
3	No704	III	0																															no Aer
3	No707	III	0																															no Aer
3	No708	III	0																															no Aer
3	No710	III	0																															no Aer
3	No711	III	0																															no Aer
3	No712	III	0																															no Aer
3	No713	III	0																															no Aer
3	No980	I	2		Hpla	Cl	yes	Su	yes		no		no	Leu			no	Choi		no		no		no	Ac	yes	Argal			no	no			759,3 (14,6)	Hplac,Cl,Su-Leu-Choi,Ac-Argal	793,3 (15,5)	Hplac,2Cl,Su-Leu-Choi,Ac-Argal
3	No1020	I	1		Hpla	Cl	yes	Su	yes		no		no	Leu/Ile			no	Choi		no		no		no		no	Argal			no	no			717,3 (6,9)	Hplac,Cl,Su-Leu/Ile-Choi-Argal
3	PCC9214	III	0																															no Aer
3	CCAP1460.6	III	0																															no Aer
Corresponding structural modification detected
Gene present but no modification (obvious reson)
Gene present but no modification (no obvious reson)
[truncated: 2 more columns]

## Sheet: Table S6. List of all strains
Table S6: List of all Planktothrix strains, pigmentation and origin, and presence of mcy genes and microcystin as described [6, 24] and grouped according to the phylogenetic lineages as described [23]. Taxonomic affiliation according to Suda et al. [35], Kurmayer et al. [24], Gaget et al. [36].
Phylogenetic lineage	Taxonomic affiliation	Strain	Pigmentation	Origin	Year of isolation	Isolator	mcy gene cluster (y/n)	MC (y/n)
1	P. agardhii	No2A	green	L. Markusbölefjärden (FI)	uk	uk	n	n
1	P. agardhii	No31/1	green	Wannsee (DE)	2001	Kurmayer R	y	y
1	P. agardhii	No32	green	Wannsee (DE)	2001	Kurmayer R	y	y
1	P. agardhii	No39	green	Wannsee (DE)	2001	Kurmayer R	y	y
1	P. agardhii	No41	green	Jägerteich (AT)	2001	Kurmayer R	n	n
1	P. agardhii	No63	green	Jägerteich (AT)	2001	Kurmayer R	n	n
1	P. agardhii	No66	green	Jägerteich (AT)	2001	Kurmayer R	n	n
1	P. agardhii	No79	green	L. Arresø (DK)	2001	Kurmayer R	y	y
1	P. agardhii	No250	green	Albufera Lagune (ES)	2003	Kurmayer R	n	n
1	P. agardhii	No251	green	Albufera Lagune (ES)	2003	Kurmayer R	n	n
1	P. agardhii	No252	green	Albufera Lagune (ES)	2003	Kurmayer R	n	n
1	P. agardhii	No253	green	Albufera Lagune (ES)	2003	Kurmayer R	n	n
1	P. agardhii	No254	green	Albufera Lagune (ES)	2003	Kurmayer R	n	n
1	P. agardhii	No255	green	Albufera Lagune (ES)	2003	Kurmayer R	n	n
1	P. agardhii	No256	green	Albufera Lagune (ES)	2003	Kurmayer R	n	n
1	P. agardhii	No257	green	Albufera Lagune (ES)	2003	Kurmayer R	n	n
1	P. agardhii	No259	green	Wannsee (DE)	2003	Kurmayer R	n	n
1	P. agardhii	No263	green	Wannsee (DE)	2003	Kurmayer R	n	n
1	P. agardhii	No274	green	Wannsee (DE)	2003	Kurmayer R	n	n
1	P. agardhii	No281	green	Wannsee (DE)	2003	Kurmayer R	n	n
1	P. agardhii	No299	green	Klinkenbergerplas (NL)	2004	Kurmayer R	n	n
1	P. agardhii	No307	green	Klinkenbergerplas (NL)	2004	Kurmayer R	n	n
1	P. agardhii	No320	green	Klinkenbergerplas (NL)	2004	Kurmayer R	n	n
1	P. agardhii	No354	green	Moose L. (CA)	2006	Kurmayer R	n	n
1	P. agardhii	No394	green	Moose L. (CA)	2006	Kurmayer R	n	n
1	P. agardhii	No759	green	São Domingos (PT)	2007	Kurmayer R	n	n
1	P. agardhii	No760	green	São Domingos (PT)	2007	Kurmayer R	n	n
1	P. agardhii	No781	green	L. Nero (RU)	2008	Kurmayer R	n	n
1	P. agardhii	No787	green	São Domingos (PT)	2007	Kurmayer R	n	n
1	P. agardhii	No788	green	São Domingos (PT)	2007	Kurmayer R	n	n
1	P. agardhii	No790	green	São Domingos (PT)	2007	Kurmayer R	n	n
1	P. agardhii	No828	green	L. Nero (RU)	2008	Kurmayer R	n	n
1	P. agardhii	No829	green	L. Nero (RU)	2008	Kurmayer R	n	n
1	P. agardhii	No976	green	Ft. Lowell, Tucson (US)	2009	Kurmayer R	n	n
1	P. agardhii	CCAP1459/15	green	Lough Neagh (UK)	1979	Jaworski GHM	n	n
1	P. agardhii	NIES-596	green	Veluwermeer (NL)	uk	uk	n	n
1	P. agardhii	NIVA-CYA116	green	L. Arungen (NO)	1983	Skulberg R	n	n
1	P. agardhii	NIVA-CYA126/8	green	L. Langsjön (FI)	1984	Skulberg R	y	y
1	P. agardhii	PH123	green	Lake Lange Sø (DK)	1993	Henriksen P	y	y
1	P. agardhii	PCC7805	green	Veluwemeer (NL)	1972	Kappers FI	n	n
1	P. agardhii	PCC7811	green	Paris, Vert le Petit (FR)	1964	Tassigny M	n	n
1	P. agardhii	SAG5.81	green	Kiessee (DE)	1963	Pringsheim EG	n	n
1A	P. agardhii	No277	green	Wannsee (DE)	2003	Kurmayer R	n	n
1A	P. agardhii	No364	green	Moose L. (CA)	2006	Kurmayer R	n	n
1A	P. agardhii	No365	green	Moose L. (CA)	2006	Kurmayer R	n	n
1A	P. rubescens	No371	red	Moose L. (CA)	2006	Kurmayer R	n	n
1A	P. rubescens	No372	red	Moose L. (CA)	2006	Kurmayer R	n	n
1A	P. agardhii	No384	green	Moose L. (CA)	2006	Kurmayer R	n	n
1A	P. agardhii	No390	green	Moose L. (CA)	2006	Kurmayer R	n	n
1A	P. rubescens	No396	red	Moose L. (CA)	2006	Kurmayer R	n	n
1A	P. rubescens	No553	red	Moose L. (CA)	2006	Kurmayer R	n	n
1A	P. rubescens	No557	red	Moose L. (CA)	2006	Kurmayer R	n	n
2	P. rubescens	No3	red	Mondsee (AT)	2001	Kurmayer R	y	y
2	P. rubescens	No21-	red	Figur (AT)	1999	Kurmayer R	y	y
2	P. rubescens	No40	red	Mondsee (AT)	2001	Kurmayer R	y	y
2	P. rubescens	No64	red	Wörthersee (AT)	2001	Kurmayer R	y	y
2	P. rubescens	No67	red	Wörthersee (AT)	2001	Kurmayer R	y	inactive
2	P. rubescens	No80	red	Schwarzensee (AT)	2001	Kurmayer R	y	y
2	P. rubescens	No82	red	Ammersee (DE)	2001	Kurmayer R	y	y
2	P. rubescens	No83/2	red	Ammersee (DE)	2001	Kurmayer R	y	y
2	P. rubescens	No91/1	red	Mondsee (AT)	2001	Kurmayer R	y	inactive
2	P. rubescens	No97	red	Mondsee (AT)	2001	Kurmayer R	y	y
2	P. rubescens	No108	red	Irrsee (AT)	2001	Kurmayer R	y	y
2	P. rubescens	No110	red	Mondsee (AT)	2001	Kurmayer R	y	inactive
2	P. rubescens	No111	red	Mondsee (AT)	2001	Kurmayer R	y	y
2	P. rubescens	No139	red	Grabensee (AT)	2002	Kurmayer R	y	inactive
2	P. rubescens	No145	red	Grabensee (AT)	2002	Kurmayer R	y	inactive
2	P. rubescens	No161	red	Grabensee (AT)	2002	Kurmayer R	y	inactive
2	P. rubescens	No166	red	Grabensee (AT)	2002	Kurmayer R	y	inactive
2	P. rubescens	No169	red	Grabensee (AT)	2002	Kurmayer R	y	inactive
2	P. rubescens	No170	red	Grabensee (AT)	2002	Kurmayer R	y	inactive
2	P. rubescens	No178	red	Grabensee (AT)	2002	Kurmayer R	y	inactive
2	P. agardhii	No260	green	Wannsee (DE)	2003	Kurmayer R	y	y
2	P. rubescens	No403	red	Moore(Crane) L. (CA)	2006	Kurmayer R	y	inactive
2	P. rubescens	No405	red	Moore(Crane) L. (CA)	2006	Kurmayer R	y	inactive
2	P. rubescens	No406	red	Moore(Crane) L. (CA)	2006	Kurmayer R	y	inactive
2	P. rubescens	No496/1	red	Moore(Crane) L. (CA)	2006	Kurmayer R	y	inactive
2	P. rubescens	No550	red	Moore(Crane) L. (CA)	2006	Kurmayer R	y	inactive
2	P. rubescens	No551	red	Moore(Crane) L. (CA)	2006	Kurmayer R	y	inactive
2	P. rubescens	No761	red	R. Garcia (IT)	2007	Kurmayer R	y	y
2	P. rubescens	No762	red	R. Garcia (IT)	2007	Kurmayer R	y	y
2	P. rubescens	No776	red	R. Nicolletti (IT)	2007	Kurmayer R	y	y
2	P. rubescens	No778	red	R. Nicolletti (IT)	2007	Kurmayer R	y	y
2	P. agardhii	No804	green	Winnecook L. (US)	2007	Kurmayer R	y	y
2	P. agardhii	No806	green	Winnecook L. (US)	2007	Kurmayer R	y	y
2	P. agardhii	No808	green	Winnecook L. (US)	2007	Kurmayer R	y	y
2	P. rubescens	No839	red	R. Garcia (IT)	2007	Kurmayer R	y	y
2	P. agardhii	CCAP1459/11A	green	L. Windermere (UK)	1975	Jaworski GHM	y	y
2	P. agardhii	CCAP1459/16	green	Blelham Tarn (UK)	1979	Jaworski GHM	y	y
2	P. agardhii	CCAP1459/17	green	Blelham Tarn (UK)	1981	Jaworski GHM	y	y
2	P. rubescens	CCAP1459/30	red	Plöner See (DE)	uk	Meffert M-E	y	y
2	P. agardhii	CCAP1459/31	green	White Lough (IR)	1971	Fitzsimons AG	y	y
2	P. rubescens	NIVA-CYA98	red	L. Steinsfjorden (NO)	1982	Skulberg R	y	y
2	P. rubescens	NIVA-CYA406	red	L. Steinsfjorden (NO)	1998	Skulberg R	y	y
2	P. rubescens	NIVA-CYA407	red	L. Steinsfjorden (NO)	1998	Skulberg R	y	y
2	P. rubescens	NIVA-CYA540	red	L. Steinsfjorden (NO)	2004	Lentz M	y	y
2	P. rubescens	PCC7821	red	L. Gjersjoen (NO)	1971	Romstad R	y	y
2A	P. agardhii	No757	green	L. Hormajärvi (FI)	2007	Kurmayer R	y	y
2A	P. agardhii	No758	green	L. Hormajärvi (FI)	2007	Kurmayer R	y	y
2A	P. agardhii	No763	green	L. Hormajärvi (FI)	2007	Kurmayer R	y	y
2A	P. agardhii	No764	green	L. Hormajärvi (FI)	2007	Kurmayer R	y	y
2A	P. agardhii	No765	green	L. Hormajärvi (FI)	2007	Kurmayer R	y	y
2A	P. agardhii	No766	green	L. Hormajärvi (FI)	2007	Kurmayer R	y	y
2A	P. agardhii	No769	green	L. Hormajärvi (FI)	2007	Kurmayer R	y	y
2A	P. agardhii	No770	green	L. Hormajärvi (FI)	2007	Kurmayer R	y	y
2A	P. agardhii	No771	green	L. Hormajärvi (FI)	2007	Kurmayer R	y	y
2A	P. agardhii	No772	green	L. Hormajärvi (FI)	2007	Kurmayer R	y	y
2A	P. agardhii	No873	green	L. Hiidenvesi (FI)	2007	Kurmayer R	y	y
2A	P. agardhii	CCAP1459/36	green	L. Gjersjoen (NO)	1968	Skulberg O	y	inactive
2A	P. agardhii	NIVA-CYA15	green	L. Kolbotnvatnet (NO)	1976	Romstad R	y	y
2A	P. agardhii	NIVA-CYA34	green	L. Kolbotnvatnet (NO)	1976	Skulberg R	y	inactive
2A	P. agardhii	NIVA-CYA56/3	green	L. Steinsfjorden (NO)	1978	Källqvist T	y	y
2A	P. agardhii	NIVA-CYA405	green	L. Steinsfjorden (NO)	1998	Skulberg R	y	y
3	P. pseudagardhii	No704	green	Saka (UG)	2007	Kurmayer R	n	n
3	P. pseudagardhii	No707	green	Saka (UG)	2007	Kurmayer R	n	n
3	P. pseudagardhii	No708	green	Saka (UG)	2007	Kurmayer R	n	n
3	P. pseudagardhii	No710	green	Saka (UG)	2007	Kurmayer R	n	n
3	P. pseudagardhii	No711	green	Saka (UG)	2007	Kurmayer R	n	n
3	P. pseudagardhii	No712	green	Saka (UG)	2007	Kurmayer R	n	n
3	P. pseudagardhii	No713	green	Saka (UG)	2007	Kurmayer R	n	n
3	P. pseudagardhii	No980	green	Ft. Lowell, Tucson (US)	2009	Kurmayer R	n	n
3	P. pseudagardhii	No1020	green	Vaal River (ZA)	2013	Barnard S	n	n
3	P. mougeotii	CCAP1460/6	green	Nakhon Pathon (TH)	1996	Suda S	n	n
3	P. tepida	PCC9214	green	Landjia (CF)	1989	Thiery I	n	n

## Sheet: Table S7. Sequencing results
Table S7: Sequences obtained from PCR products for various regions of aer BGC from Planktothrix strains No63, No253, No790, No980 and No1020 as well as some selected aer gene fragments.
>No.63_aerBGC
NNNNNNNNNNNNNNNNNNNNNNNNNNNNNNNNNNNNNNNNNNNNNNNNNNNNNNNNNNNNNNNNNNNNNNNNNNNNNNNNNNNNNNNNNNNNNNNNNNNNNNNNNNNNNNNNNNNNNNNNNNNNNNNNNNNNNNNNNNNNNNAACTAGAAGAaTTATCCTCTAATGTGGGGTCAAAATTACCCGATCATCTCTTACCCACTCTCTATGTGCAAGTTTCTAACTTACCCTTAACAAATACTGGTTGTGTCGATGAGTTAGCCTTAAAAAATATAGAAATTATCGACGAAAATTTAGTAAATAATACCGAAAAAAAACTACAGTCTTTATCAGGGATTGAGCAAGTTGCTGTGGTCATTACTTCCCAAAAATACAAAAATCTCCCGCTACATCTATCGGAA…
>No.790_aerBGC
NNNNNNNNNNNNNNNNNNNNNNNNNNNNNNNNNNNNNNNNNNNNNNNNNNNNNNNNNNNNNNNNNNNNNNNNNNNNNNNNNNNNNNNNNNNNNNNNNNNNNNNNNNNNNNNNNNNNNNNNNNNNNNNNNNNNNNNNNNNNNNNACTAGAACAATTATCCTCTAATGTGGGGTCAAAATTACCCGATCATCTCTTACCCACTCTCTATGTGCAAGTTTCTAACTTACCCTTAACAAATACTGGTTGTGTCGATGAGTTAGCCTTAAAAAATATAGAAATTATCGACGAAAATTTAGTAAATAATACCGAAAAAAAACTACAGTCTTTATCAGGGATTGAGCAAGTTGCTGTGGTCATTACTTCCCAAAAATACAAAAATCTCCCGCTACATCTATCGGAA…
>No.253_aerBGC
NNNNNNNNNNNNNNNNNNNNNNNNNNNNNNNNNNNNNNNNNNNNNNNNNNNNNNNNNNNNNNNNNNNNNNNNNNNNNNNNNNNNNNNNNNNNNNNNNNNNNNNNNNNNNNNNNNNNNNNNNNNNNNNNNNNNNNNNNNNNNAAACTAGAACAATTATCCTCTAATGTGGGGTCAAAATTACCCGATCATCTCTTACCCACTCTCTATGTGCAAGTTTCTAACTTACCCTTAACAAATACTGGTTGTGTCGATGAGTTAGCCTTAAAAAATATAGAAATTATCGACGAAAATTTAGTAAATAATACCGAAAAAAAACTACAGTCTTTATCAGGGATTGAGCAAGTTGCTGTGGTCATTACTTCCCAAAAATACAAAAATCTCCCGCTACATCTATCGGAA…
>No.980_aerBGC
NNNNNNNNNNNNNNNNNNNNNNNNNNNNNNNNNNNNNNNNNNNNNNNNNNNNNNNNNNNNNNNNNNNNNNNNNNNNNNNNNNNNNNNNNNNNNNNNNNNNNNNNNNNNNNNNNNNNNNNNNNNNNNNNNNNNNNNNNNNNNNNNNNNNNNNNNNNNTCCTCAGATCTACAGTCTAAGTTACCGGACAATCTCCTGCCTAATATCTATGTGCAAATTTCTAGCTTACCCTTGACAGATAGCGGTGATGTTGATGAAGTTGCATTAAAAAATATTGAAATTATCGACGATAACCAAGTTAAGCAGACAGAAGATAAACTTCGATCTTTGCCAAACCTTGATCAAGTTGCAGTCGTCATTAATTCCCACAAAAGCAAAATTCTACCCCTTCATCTATCAGAC…
>No.1020_aerBGC
NNNNNNNNNNNNNNNNNNNNNNNNNNNNNNNNNNNNNNNNNNNNNNNNNNNNNNNNNNNNNNNNNNNNNNNNNNNNNNNNNNNNNNNNNNNNNNNNNNNNNNNNNNNNNNNNNNNNNNNNNNNNNNNNNNNNNNNNNNNNNNNNNNNNNNNAATTGTCCTCGGAGCTACAGTCTAAATTACCGAACAATCTCCTGGCGAATGTCTATGTGCAAATTTCTAGTTTACCCTTGACCGATAGCGGTGATATCGATGAAACTGCATTAAAGAATATCGAAATTATCGATGATAATCAAGTTCAGGAGACAGAAGAAAAACTACGGTCTTTGTTAGATATTGATCAAGTTGCCATTGTCCTGACTTCCCAAAAAATTAAAATTCCACCACTGCATCTATCGGAC…
>No145_AerSc4+/-
GAATCCTCAGCAAAAAGTCGGGGAATTACCCTTACTTACTGACCCAGAAAAACAACAAATATTAGTGGAATGGAATCAAACTCAAGTCCCCTATCGGGATCATCAATGTATTCATCAGTTATTTGAAGAACAGGTTGCCAAAAATCCTGATGCTGTGGCGGTCATTTATGAACAGGAATCCCTCACCTATCAACAGTTAAATCAAAAAGCAAATCAACTCGCCCATTATCTGCAAAGTTTAGGGATTAAAACCGAGGAATTAGTAGGAGTTTGTGTAGAGCGATCGCCATTAATAATTATTGGTATTTTAGGAATTCTTAAAGCGGGTGCAGCTTATTTACCTTTAGATCCCAACTATCCATCAGAACGTCTAGCTTATATGCTAGAAGATTCTGCGGT…
>No161_AerSc4+/-
AAGTCGGGGAATTACCCTTACTTACTGACCCAGAAAAACAACAAATATTAGTGGAATGGAATCAAACTCAAGTCCCCTATCGGGATCATCAATGTATTCATCAGTTATTTGAAGAACAGGTTGCCAAAAATCCTGATGCTGTGGCGGTCATTTATGAACAGGAATCCCTCACCTATCAACAGTTAAATCAAAAAGCAAATCAACTCGCCCATTATCTGCAAAGTTTAGGGATTAAAACCGAGGAATTAGTAGGAGTTTGTGTAGAGCGATCGCCATTAATAATTATTGGTATTTTAGGAATTCTTAAAGCGGGTGCAGCTTATTTACCTTTAGATCCCAACTATCCATCAGAACGTCTAGCTTATATGCTAGAAGATTCTGCGGTATCTGTATTATTAA…
>No40_Aer5+/-
TTTACCCGAACTCCATCACTTTAATCAATCGGTATTCTTAGAAGTTCCGGCCCATCTACAGCCGGATTTATTAAAACCAGCCATTGCCAAATTACTGTATCATCATGATGCTTTACGTTTACGCTTTGTGCATAAACAAGGACAATGGCAACAGTATCACAGCGATGATTGGGAGTCTTTTGGTTTTGAAGTCATGGATTTATCCCCGATGTCTTCGGGTGAACAATTGACCACAATGGCAGAAATTTCAGAGGCTCAACAGCGCTCCCTAAATTTAGAAAAAGGCCCCTTAATTTCGGTGGTTTTCTTTCAATTAGGTGACGCAGGAAGATTGTTAATTATTATTCATCATCTAGTAGTCGATGGGGTTTCCTGGCGCATTTTCCTAGAAGATTTACT…
>No806_AerSc3+/66Sc3-
GCAAATGTCCTTAACCTACCCCAAATCGGTATTCACGACAATTTCTTTGAACTCGGAGGACATTCATTGCTGGGGAGTCAAGTCATATCTCGTTTGCGGGATGTTTTCTCGTTGGAATTATCTTTACAGAGTTTATTAGAATACCCGACTGTGGCTAGTTTAACTCAAACCCTTGAGGTGCTGAATGTAGTCAAAAATAGTCATAGTGCTATGACAGAAACCCAAGAAGATTACGAAGAAGGAGAATTATGAAAATATGTTGATTGAGGCTTTTTGGAGTTCGTTTCATGTAGAATGTAAAGTTATATATGTATTTGATATTTCTGGTCAGGGATATGCTATAAACAATGACCAGAAAACGAACCCAAATCAAAAAAAACTAAACCGCTATTCACACAA…
>No67_AerSc14+/-
AAAGCTGTACCAAAATATTATGTACATCCTCACGATTAGATGATCATTCATATAGATGGGTGATTAAATTGAGAAGTTATGGAATTGAGATAGCAGATCTAATCTTTAAGCATTTTCCCAAAGCCAAAATTATTTTCTTATATCGGGATACTGAAACTTGGATGAAGTCTGTTTTTCGTGCATCTTTAGGAGAAATTCCTAATACAGTTGATTCTCTAAAAGCAATGCAAAATCAAGTCAGTCAAGTTAGTCCCCTAATTCATCAGGATGAACAGGATCAACCCTTATCTTATCTGCAAATTTTAACCTTAGCATGGTTATCAGTCATGGAAGGTTATTTGCGACTCCATCAACAAGGAGTTTTGGCTCTAGCGATTCGTTTTCAGGATTTGATAACAG…
>No372_AerSc14+/-
GCTGTACCAAAATATTATGTACATCCTCACCATTAGATGATCATTCATATAGATGGGTGATTAAATTGAGAAGTTATGGAATTGAGATAGCAGATCTAATCTTTAAGCATTTTCCTAAAGCCAAAATTATTTTCTTATATCGGGATACTGAAACTTGGATGAAGTCTGTTTTTCGTGCATCTTTAGGAGAAATTCCTAATACAGTTGATTCTCTAAAAGCAATGCAAAATCAAGTCAGTCAAGTTAGTCCCCTAATTCATCAGGATGAACGGGATCAACCCTTATCTTATCTGCAAATTTTAACCTTAGCATGGTTATCAGTCATGGAAGGTTATTTGCGACTCCATCAGCAAGGAGTTTTAGCTCTAGCGATTCGTTTTCAGGATTTGATAACAGCAC…
>No557_AerSc14+/-
GCTGTACCAAAATATTATGTACATCCTCACCATTAGATGATCATTCATATAGATGGGTGATTAAATTGAGAAGTTATGGAATTGAGATAGCAGATCTAATCTTTAAGCATTTTCCTAAAGCCAAAATTATTTTCTTATATCGGGATACTGAAACTTGGATGAAGTCTGTTTTTCGTGCATCTTTAGGAGAAATTCCTAATACAGTTGATTCTCTAAAAGCAATGCAAAATCAAGTCAGTCAAGTTAGTCCCCTAATTCATCAGGATGAACGGGATCAACCCTTATCTTATCTGCAAATTTTAACCTTAGCATGGTTATCAGTCATGGAAGGTTATTTGCGACTCCATCAGCAAGGAGTTTTAGCTCTAGCGATTCGTTTTCAGGATTTGATAACAGCAC…

## Sheet: References
References
6	Kurmayer, R.; Deng, L.; Entfellner, E., Role of toxic and bioactive secondary metabolites in colonization and bloom formation by filamentous cyanobacteria Planktothrix. Harmful Algae 2016, 54, 69-86. doi: 10.1016/j.hal.2016.01.004.
23	Entfellner, E.; Frei, M.; Christiansen, G.; Deng, L.; Blom, J.; Kurmayer, R., Evolution of Anabaenopeptin Peptide Structural Variability in the Cyanobacterium Planktothrix. Front Microbiol 2017, 8, 219. doi: 10.3389/fmicb.2017.00219.
24	Kurmayer, R.; Blom, J. F.; Deng, L.; Pernthaler, J., Integrating phylogeny, geographic niche partitioning and secondary metabolite synthesis in bloom-forming Planktothrix. ISME J 2015, 9, (4), 909-21. doi: 10.1038/ismej.2014.189.
35	Suda, S.; Watanabe, M. M.; Otsuka, S.; Mahakahant, A.; Yongmanitchai, W.; Nopartnaraporn, N.; Liu, Y.; Day, J. G., Taxonomic revision of water-bloom-forming species of oscillatorioid cyanobacteria. Int J Syst Evol Microbiol 2002, 52, (Pt 5), 1577-1595. doi: 10.1099/00207713-52-5-1577.
36	Gaget, V.; Welker, M.; Rippka, R.; de Marsac, N. T., A polyphasic approach leading to the revision of the genus Planktothrix (Cyanobacteria) and its type species, P. agardhii, and proposal for integrating the emended valid botanical taxa, as well as three new species, Planktothrix paucivesiculata sp. nov. ICNP, Planktothrix tepida sp. nov. ICNP, and Planktothrix serta sp. nov. ICNP, as genus and …
